# Supplementary material for: MicroRNAs in Renal Cell Carcinoma: Diagnostic Implications of Serum miR-1233 Levels
Source: PLoS One. 2011 Sep 30;6(9):e25787. doi: 10.1371/journal.pone.0025787 (PMC3184173; doi:10.1371/journal.pone.0025787)
Supplement: Table S1 — (XLS) [file pone.0025787.s001.xls]

## Sheet: Results - Low Density Array A
Well	Assay ID	Gene	A_serum	B_serum	C_serum	D_serum	E_serum	F_serum	G_serum	H_serum	I_serum	J_serum	K_serum	L_serum	G_rcc	H_rcc	I_rcc	J_rcc	K_rcc	L_rcc	G_norm	H_norm	I_norm	J_norm	K_norm	L_norm
A1	377	hsa-let-7a	Undetermined	Undetermined	28.9541	Undetermined	Undetermined	Undetermined	Undetermined	Undetermined	30.0949	Undetermined	30.302	28.0872	Undetermined	18.3166	19.3027	19.0517	18.3729	18.7274	19.617	18.4519	20.407	19.2885	17.9638	18.0949
A10	2218	hsa-miR-10b	Undetermined	Undetermined	Undetermined	Undetermined	Undetermined	Undetermined	Undetermined	Undetermined	Undetermined	Undetermined	Undetermined	Undetermined	19.8003	17.9	19.6935	18.7237	18.123	18.1982	18.6883	17.1891	18.2776	17.368	16.9744	16.8083
A11	1973	U6 snRNA	Undetermined	26.3731	26.2857	25.0892	25.3068	25.878	21.9263	20.9337	23.3574	25.0545	24.077	21.003	15.3735	13.8893	14.8802	14.5377	13.5468	16.3434	15.3505	13.839	14.8797	14.5193	13.6221	13.8838
A12	1973	U6 snRNA	26.5174	26.4676	26.1285	25.106	25.4657	25.9518	21.9924	21.1595	23.3277	24.9247	23.9216	20.9862	15.4217	12.9839	14.7228	14.767	13.5926	16.4326	15.0935	13.8701	15.0566	14.525	13.552	13.8916
A13	389	hsa-miR-15a	31.9924	Undetermined	Undetermined	Undetermined	Undetermined	Undetermined	29.4349	Undetermined	Undetermined	Undetermined	Undetermined	Undetermined	23.0454	22.5521	24.476	24.1802	24.7331	23.7999	25.8304	24.7316	25.8673	24.972	26.484	23.5883
A14	390	hsa-miR-15b	27.3951	25.3444	24.6609	25.5052	24.7848	26.0642	24.2017	26.3268	24.3465	24.6085	25.5489	23.2984	21.2988	Undetermined	20.6653	20.4766	20.6065	20.0385	22.8573	21.5547	22.8916	22.2534	20.7779	20.4771
A15	391	hsa-miR-16	20.3458	19.0988	19.688	20.1427	18.8948	19.6551	17.1308	19.0014	18.6195	17.9135	19.4142	17.9425	17.5792	16.2087	17.5705	17.6285	17.9254	17.2954	19.0707	17.8326	19.4913	18.6782	17.9211	16.3554
A16	2308	hsa-miR-17	21.1405	19.7102	20.1722	20.6571	19.7858	21.357	18.2388	19.786	19.1917	19.3835	20.8269	19.2097	17.6834	16.4401	17.3835	17.7124	17.3351	17.3325	18.3269	17.3036	18.6892	17.4067	16.6361	16.1801
A17	2422	hsa-miR-18a	29.8127	26.9727	27.1722	27.6492	27.1441	29.0681	26.5004	29.3835	25.9967	26.6582	27.7192	26.8523	25.1185	23.2698	24.8626	25.4658	25.6609	25.2079	26.5276	25.8086	26.8959	26.3044	25.8902	24.7458
A18	2217	hsa-miR-18b	Undetermined	Undetermined	Undetermined	Undetermined	33.1763	Undetermined	31.1976	Undetermined	31.7434	Undetermined	Undetermined	33.005	30.457	28.73	29.7042	Undetermined	30.1698	30.6167	Undetermined	30.8476	Undetermined	Undetermined	30.3155	28.4849
A19	395	hsa-miR-19a	25.4307	23.7409	24.1662	24.6744	23.8316	25.1585	22.5214	23.3708	22.8942	22.6698	Undetermined	22.8659	23.8511	22.2682	23.572	23.8243	24.9011	23.1649	25.9918	24.1144	24.9123	24.0184	24.9939	22.4266
A2	379	hsa-let-7c	37.664	30.8903	31.775	30.2922	30.1155	31.5159	29.5983	32.3987	29.8885	29.505	31.1994	30.0275	21.4152	20.8517	19.9114	20.4888	18.9384	19.2697	20.5796	19.2285	20.6488	19.8501	18.5292	19.0344
A20	396	hsa-miR-19b	20.8494	19.2019	19.6647	20.2899	19.0686	20.6569	17.7608	18.9105	18.6033	18.0958	19.851	18.1383	18.8261	17.2696	18.8866	18.9407	18.9312	18.3838	19.655	19.0489	19.6486	18.6271	19.1292	16.8601
A21	580	hsa-miR-20a	22.9202	20.2682	20.9239	21.3357	20.6471	21.9771	20.0538	21.1242	19.7754	20.0231	21.2468	19.689	18.066	17.1698	18.3487	18.0275	17.9818	17.9311	19.2559	18.4527	19.5093	18.1644	17.9392	16.7204
A22	1014	hsa-miR-20b	25.6929	24.0286	24.5568	24.9223	24.3303	25.8182	22.371	24.194	23.4987	23.5005	25.1342	23.6672	22.7268	21.5455	21.8258	22.486	22.2238	22.27	22.4412	21.7427	22.1217	21.536	20.708	20.0648
A23	397	hsa-miR-21	25.6758	23.555	23.3909	24.0627	23.4447	24.9506	23.3781	23.7969	22.295	22.3777	23.2282	22.0939	16.1762	14.3515	16.4787	17.3659	17.5859	16.2708	18.0942	16.7833	19.7877	18.6774	18.1885	16.7862
A24	398	hsa-miR-22	Undetermined	Undetermined	Undetermined	Undetermined	Undetermined	Undetermined	Undetermined	Undetermined	29.5451	29.2422	Undetermined	Undetermined	23.2181	21.2498	22.9176	23.8923	22.9881	22.1878	22.2197	21.946	21.656	21.9542	21.7029	Undetermined
A3	2283	hsa-let-7d	28.9427	27.6743	25.9911	26.5095	Undetermined	28.6992	26.0578	28.2493	26.0746	26.3858	26.6221	25.0926	19.5545	18.641	19.2694	19.5316	18.7694	0	20.1779	18.5621	20.1523	19.2064	18.1253	17.9596
A4	2406	hsa-let-7e	27.4334	26.6672	24.5186	24.7439	25.4828	27.2133	25.2007	28.3036	25.0264	25.5132	24.8834	23.4911	16.876	Undetermined	16.69	16.83	15.9699	16.5223	17.3123	15.4575	17.7118	16.46	15.7922	15.4574
A5	382	hsa-let-7f	Undetermined	Undetermined	Undetermined	Undetermined	Undetermined	Undetermined	Undetermined	Undetermined	Undetermined	Undetermined	Undetermined	Undetermined	22.9171	22.0422	22.7913	22.8796	22.1313	22.4312	22.9058	21.6575	23.9978	22.3579	22.0948	21.403
A6	2282	hsa-let-7g	28.0661	26.4355	25.932	26.2658	25.9332	27.0754	24.7495	26.9463	25.9258	26.2305	26.9873	24.8685	19.6134	18.2674	19.5508	19.6428	19.4097	19.189	19.6965	18.5145	20.0041	19.155	18.6827	17.7343
A7	2222	hsa-miR-1	Undetermined	32.1461	32.4468	32.2788	33.9416	35.4832	30.1911	33.3704	35.1909	33.6769	32.5395	31.9804	28.0714	27.5404	28.0833	27.1712	27.5768	29.3704	28.3097	25.5448	27.4819	26.4856	27.0486	25.7751
A8	583	hsa-miR-9	Undetermined	31.9418	32.6854	35.6681	34.3279	Undetermined	35.5289	Undetermined	34.8438	33.1916	Undetermined	31.8637	26.7091	23.086	22.5517	26.1114	25.2043	25.9209	24.0098	23.1285	Undetermined	21.8492	23.2269	21.2111
A9	387	hsa-miR-10a	32.2935	30.636	29.9703	33.721	30.3199	31.4356	30.807	31.7074	31.2273	31.1581	31.3783	29.5161	20.7217	19.7522	20.9471	20.8125	18.9713	19.6164	20.082	18.5978	19.5882	18.6282	18.2965	17.5633
B1	399	hsa-miR-23a	Undetermined	33.4198	Undetermined	33.6928	Undetermined	Undetermined	33.4072	Undetermined	31.0453	33.0935	Undetermined	Undetermined	29.4238	27.0671	28.841	Undetermined	25.3497	26.0046	Undetermined	Undetermined	30.8759	Undetermined	Undetermined	26.4142
B10	411	hsa-miR-28	30.1705	28.8764	27.1597	28.2451	27.9306	30.2827	27.0765	29.3725	27.1692	27.6356	28.3297	26.9149	22.1941	20.1202	21.6659	21.3757	21.3748	21.2414	22.7263	Undetermined	22.9423	21.8688	21.0867	20.7067
B11	1973	U6 snRNA	26.3482	26.6398	26.0642	25.084	25.4183	25.8486	21.8905	21.5286	23.234	24.9044	23.8171	21.0095	15.1989	13.8047	14.8506	14.564	13.5853	16.2663	15.0431	13.8176	14.8872	14.5705	13.5493	13.7249
B12	1973	U6 snRNA	26.4587	26.6813	26.112	24.9888	25.4602	25.8749	21.9447	21.0758	23.1849	Undetermined	24.0367	20.9968	15.0825	13.795	14.8106	14.5921	13.7107	16.3145	15.2671	13.768	15.1227	14.5389	13.7124	13.8727
B13	2112	hsa-miR-29a	26.6407	25.2866	25.0621	25.8948	24.7791	25.8718	23.9115	24.2351	24.037	24.1765	25.7243	22.4259	17.6932	17.6366	18.6081	18.1254	17.5818	17.1065	18.108	17.2227	18.4103	17.1941	17.6347	16.0506
B14	413	hsa-miR-29b	34.1262	33.334	31.515	35.7138	33.3832	32.8597	33.1338	32.0003	29.9261	30.5894	31.2127	31.2016	22.4476	22.2973	23.849	23.7819	23.8458	21.7886	22.9947	22.6372	22.9787	22.2599	22.5066	21.1967
B15	587	hsa-miR-29c	27.6586	25.9553	25.5313	26.7277	25.9426	27.5001	24.7535	25.2875	24.741	25.2243	26.313	23.9646	18.7943	18.77	20.1326	19.5736	19.5032	18.2465	18.7539	18.6291	19.5732	18.2435	19.2178	17.4008
B16	602	hsa-miR-30b	25.1827	23.9247	22.6784	23.2058	23.1182	24.8304	22.9075	24.057	22.5396	22.6755	23.136	21.6347	15.9537	16.0864	16.104	15.6187	15.3612	15.4	15.3996	14.8347	15.8843	14.7838	14.0661	13.733
B17	419	hsa-miR-30c	24.9401	23.4683	22.3058	23.0267	22.8009	24.4662	22.6556	23.656	22.2835	22.2827	22.7686	21.3219	15.3269	15.2776	15.3887	14.729	14.3383	14.4018	14.4995	13.6137	15.0076	13.8183	12.8093	12.6711
B18	2279	hsa-miR-31	27.9822	27.1224	26.6374	27.9824	27.033	27.4718	26.9996	25.6896	27.472	26.692	28.3016	26.4283	23.9339	21.5837	19.136	25.0419	20.982	22.5982	21.7427	19.7602	22.3305	19.9579	20.3054	18.4349
B19	2109	hsa-miR-32	35.362	32.2636	33.4536	34.4048	32.1927	32.5895	30.8722	Undetermined	31.5506	30.6653	31.7474	31.1793	26.9027	26.491	27.8608	27.2978	28.3493	26.1564	26.9877	26.8789	27.8511	26.7961	27.086	25.4496
B2	400	hsa-miR-23b	Undetermined	Undetermined	Undetermined	Undetermined	Undetermined	Undetermined	Undetermined	Undetermined	Undetermined	Undetermined	Undetermined	Undetermined	24.9388	25.5814	24.9907	Undetermined	22.8672	24.4339	23.5782	22.035	23.2416	22.4248	21.5639	21.8619
B20	2085	hsa-miR-33b	Undetermined	Undetermined	Undetermined	Undetermined	Undetermined	Undetermined	Undetermined	Undetermined	34.7471	Undetermined	Undetermined	Undetermined	Undetermined	Undetermined	Undetermined	Undetermined	34.472	Undetermined	Undetermined	Undetermined	Undetermined	Undetermined	Undetermined	33.5131
B21	426	hsa-miR-34a	31.3324	31.9467	Undetermined	31.6699	28.9459	31.1739	31.8554	Undetermined	31.1935	31.2193	30.9797	29.8897	18.6027	17.7923	19.0345	19.4891	18.9101	18.5903	21.5778	19.1529	21.9168	20.3968	20.1501	Undetermined
B22	428	hsa-miR-34c	Undetermined	37.2358	Undetermined	Undetermined	Undetermined	Undetermined	Undetermined	Undetermined	Undetermined	36.3201	Undetermined	34.9069	28.4668	25.3167	28.0388	29.5947	27.0472	28.3494	30.279	27.948	30.0044	29.0828	28.253	Undetermined
B23	431	hsa-miR-92a	22.7218	20.5799	21.1021	Undetermined	20.6321	21.7931	19.8456	21.5099	19.8954	19.3808	21.0375	20.5142	19.5285	18.4937	18.9629	19.2454	18.2617	18.1758	19.7897	18.6656	19.6764	18.763	17.7453	Undetermined
B24	1090	hsa-miR-93	25.2423	23.7052	24.1274	Undetermined	23.655	24.837	21.071	23.4083	22.5886	22.6665	23.9617	22.2417	21.2579	19.5018	20.6684	20.6249	20.3025	19.9737	22.0541	20.7462	22.1999	21.4809	20.1126	Undetermined
B3	402	hsa-miR-24	22.4269	21.2624	20.5087	Undetermined	20.2369	22.6923	18.7842	19.838	19.6127	20.2207	20.8341	18.2855	16.2016	14.4875	15.7504	15.7465	14.6276	15.0557	16.6335	14.9492	17.0569	15.7715	14.6313	14.3398
B4	403	hsa-miR-25	25.4691	23.2127	23.6129	23.9575	Undetermined	24.1193	22.8145	24.2035	22.5108	22.0368	Undetermined	22.1685	20.9841	19.377	20.8095	20.3857	19.896	19.8792	22.204	21.0477	22.4063	21.3541	Undetermined	19.9089
B5	405	hsa-miR-26a	26.0877	24.2936	23.1663	23.8254	23.697	25.1314	23.3082	24.8631	22.8145	23.2085	23.556	22.3149	17.36	16.2936	17.8196	16.9112	16.4759	16.8184	17.1078	16.0022	17.6636	16.3803	15.9691	Undetermined
B6	407	hsa-miR-26b	26.4218	24.726	24.5725	25.0533	24.3466	24.9648	24.2527	25.7214	23.7979	24.3078	25.1219	23.3679	19.3981	18.2645	19.1844	18.9091	18.7912	18.2706	19.8032	18.6771	20.0665	18.8705	18.9731	17.4711
B7	408	hsa-miR-27a	27.4552	25.5679	25.1062	26.0603	25.2193	27.1905	25.2372	25.7942	23.9816	24.6802	25.1672	23.227	20.2931	19.4383	20.5624	20.0942	19.4432	19.1593	21.3034	20.7836	21.4238	20.1746	20.7346	18.9987
B8	409	hsa-miR-27b	29.4923	27.1867	26.9665	27.7271	27.0794	28.9691	26.4725	29.0631	26.3556	26.3818	27.6556	25.8727	20.6266	21.2392	21.2837	20.7049	19.741	19.919	20.6847	19.9484	20.7506	19.4889	19.5346	18.6455
B9	2446	hsa-miR-28-3p	27.6968	27.2227	26.5902	27.3347	26.0853	28.1717	24.1759	25.8932	25.8114	25.9699	27.3404	25.0294	21.5592	20.2021	21.2562	20.9638	20.5049	20.4706	21.9291	20.8925	22.3011	21.3235	19.8162	19.9938
C1	433	hsa-miR-95	33.6232	31.8804	Undetermined	33.2105	31.0735	31.7196	30.9935	32.3431	Undetermined	32.5679	Undetermined	31.1854	23.4669	22.0488	23.445	23.6694	22.4031	21.7641	22.8203	21.4352	23.716	22.6893	21.0622	20.6822
C10	2169	hsa-miR-106a	21.27	19.7337	20.2311	20.6469	19.9038	21.4373	18.1895	19.7596	19.1758	19.3615	20.7312	19.0268	17.8271	16.7385	17.4966	17.6852	17.3522	17.078	17.9747	17.5502	18.6845	17.5222	16.6235	16.0776
C11	1094	RNU44	Undetermined	Undetermined	Undetermined	Undetermined	34.3998	32.3903	30.1399	31.61	Undetermined	Undetermined	34.0051	33.1291	19.9644	18.2168	19.7777	19.2273	18.4752	19.5103	20.3458	18.7901	19.996	19.6158	17.7934	18.9601
C12	442	hsa-miR-106b	24.5102	22.8527	23.3993	23.9911	23.1018	24.0155	22.2779	23.5452	22.2172	22.3514	24.276	22.0015	19.7769	18.6154	19.6141	19.5693	19.7877	18.9169	20.7141	20.8731	21.8938	20.7662	20.8946	19.2094
C13	443	hsa-miR-107	34.0619	Undetermined	Undetermined	Undetermined	Undetermined	Undetermined	32.1509	Undetermined	32.2346	Undetermined	32.6504	Undetermined	26.5937	25.6288	27.1262	25.0592	25.1204	24.6548	24.3561	23.5902	25.056	24.208	22.4562	23.0137
C14	2245	hsa-miR-122	26.9639	26.82	26.1161	25.3375	22.6629	25.6358	26.3233	25.2175	26.1248	27.8589	27.2757	25.4161	23.7422	23.5841	24.8444	21.6986	23.8793	24.2921	31.1077	30.3488	Undetermined	28.8532	29.1666	Undetermined
C15	1182	hsa-miR-124a	Undetermined	Undetermined	Undetermined	Undetermined	Undetermined	Undetermined	Undetermined	Undetermined	Undetermined	Undetermined	Undetermined	Undetermined	Undetermined	32.2062	Undetermined	32.0851	Undetermined	Undetermined	29.7595	29.7993	28.316	30.4745	30.8413	31.5541
C16	2199	hsa-miR-125a-3p	Undetermined	33.5662	33.3776	36.8718	Undetermined	34.2165	32.0706	34.5858	31.5277	32.1352	32.5502	29.968	28.7315	26.62	28.675	27.7962	27.1951	27.4054	26.8026	26.6998	27.0012	27.126	26.2027	25.9371
C17	2198	hsa-miR-125a-5p	30.387	28.9655	29.1193	29.7714	27.795	31.0331	26.2796	27.922	27.7295	28.4435	29.0569	27.4277	22.2322	19.787	21.5865	21.2899	20.4763	20.8603	21.1712	20.103	21.1867	20.5309	19.4512	19.2466
C18	449	hsa-miR-125b	29.5615	28.5369	29.0784	29.7216	27.6383	29.4873	30.7476	28.9716	28.4512	26.9928	30.4611	29.6418	19.7866	17.8466	18.8676	18.6663	17.2891	17.9206	18.6535	17.6009	19.044	17.602	17.192	17.0456
C19	2228	hsa-miR-126	21.9243	20.9559	20.3839	21.2022	20.4229	22.0651	18.7041	20.0296	19.8311	20.3194	21.1136	19.3064	15.4161	13.3556	14.8436	14.3135	13.9015	14.1924	15.4725	14.9535	15.877	15.2767	14.8093	13.7582
C2	186	hsa-miR-96	Undetermined	Undetermined	Undetermined	33.7154	38.1285	Undetermined	Undetermined	Undetermined	Undetermined	Undetermined	Undetermined	35.1727	32.7317	30.3771	30.724	31.71	32.8949	31.535	31.7807	29.4609	30.9112	30.802	31.6678	29.6153
C20	452	hsa-miR-127	28.8964	27.143	27.0517	27.3337	30.542	30.3712	26.166	28.9357	27.7074	27.5616	30.6699	28.1336	23.5504	20.2053	24.1269	23.2592	21.9408	25.1944	20.5785	19.6724	22.9426	21.8373	21.0512	21.4443
C21	2229	hsa-miR-127-5p	Undetermined	Undetermined	Undetermined	Undetermined	Undetermined	Undetermined	Undetermined	Undetermined	Undetermined	Undetermined	Undetermined	Undetermined	Undetermined	Undetermined	Undetermined	Undetermined	Undetermined	Undetermined	Undetermined	Undetermined	Undetermined	Undetermined	Undetermined	Undetermined
C22	2216	hsa-miR-128a	30.5935	29.211	29.4167	29.5825	29.2992	31.3737	28.3768	30.2563	28.0766	29.1267	29.5273	27.5309	25.079	24.1111	23.56	24.7423	22.9199	24.8049	24.3471	23.9376	25.2864	23.9607	23.4407	23.2818
C23	1184	hsa-miR-129-3p	Undetermined	Undetermined	Undetermined	Undetermined	Undetermined	Undetermined	Undetermined	Undetermined	Undetermined	Undetermined	Undetermined	Undetermined	28.4954	31.0595	31.0682	Undetermined	29.9199	32.1065	29.7101	29.3118	30.4258	28.9271	28.9123	28.783
C24	590	hsa-miR-129	Undetermined	Undetermined	Undetermined	Undetermined	Undetermined	Undetermined	Undetermined	Undetermined	Undetermined	Undetermined	Undetermined	Undetermined	Undetermined	Undetermined	Undetermined	Undetermined	Undetermined	Undetermined	Undetermined	Undetermined	Undetermined	Undetermined	31.8363	Undetermined
C3	577	hsa-miR-98	Undetermined	Undetermined	Undetermined	Undetermined	Undetermined	Undetermined	Undetermined	Undetermined	Undetermined	Undetermined	38.5443	Undetermined	24.212	Undetermined	25.4073	24.4665	25.0719	25.2152	25.3618	24.3823	26.2055	25.1087	23.9242	23.2782
C4	435	hsa-miR-99a	Undetermined	30.4372	33.1239	30.7132	30.9846	Undetermined	31.0813	33.8869	31.1152	30.9897	31.9469	28.0288	19.5678	17.3987	18.4581	19.5845	18.0181	18.3996	18.3058	17.8727	19.2633	18.3479	17.7737	17.527
C5	436	hsa-miR-99b	30.9239	29.3043	28.9967	29.8581	28.881	31.4042	29.5819	30.395	28.162	29.1819	29.9487	29.0607	21.427	19.8339	21.3494	20.7099	19.613	20.5542	21.0482	19.9149	21.161	20.1946	18.9175	19.328
C6	437	hsa-miR-100	35.0244	31.1515	31.4916	31.7078	30.3279	30.9925	32.2783	31.6109	30.3764	31.0474	29.9821	29.4399	19.6863	17.1364	18.2786	19.2666	17.7916	17.7963	18.4557	17.8297	19.1252	18.1202	17.5072	17.0438
C7	2253	hsa-miR-101	28.899	26.9246	27.792	27.9942	27.1512	27.8575	27.6235	29.0993	26.21	25.8327	27.6357	26.2252	23.284	23.3988	24.3994	23.3918	24.318	23.2551	24.3879	24.4867	24.5353	23.7198	25.2732	22.4221
C8	439	hsa-miR-103	28.6348	28.125	27.0033	27.5012	28.0608	29.5394	25.6674	28.578	26.4465	27.3589	28.0754	26.9792	21.7081	20.1457	21.2878	21.5167	20.9529	21.2655	21.8721	20.8532	22.6624	21.5953	20.514	20.3248
C9	2167	hsa-miR-105	Undetermined	Undetermined	Undetermined	Undetermined	Undetermined	Undetermined	Undetermined	Undetermined	Undetermined	Undetermined	Undetermined	Undetermined	Undetermined	Undetermined	Undetermined	Undetermined	Undetermined	Undetermined	Undetermined	Undetermined	Undetermined	Undetermined	Undetermined	Undetermined
D1	454	hsa-miR-130a	28.2748	26.3939	25.5107	26.4444	26.1765	28.1956	25.2456	27.9447	24.2898	25.1802	25.2462	24.6738	21.1926	20.7733	21.525	21.0831	20.72	20.8736	21.1526	21.1358	22.6449	21.1767	20.9999	19.527
D10	1129	hsa-miR-137	Undetermined	Undetermined	Undetermined	Undetermined	Undetermined	Undetermined	Undetermined	Undetermined	Undetermined	Undetermined	Undetermined	Undetermined	31.8035	Undetermined	Undetermined	Undetermined	31.4202	Undetermined	34.8704	35.1897	34.6145	29.1472	Undetermined	29.5475
D11	2284	hsa-miR-138	Undetermined	32.5042	31.1339	Undetermined	31.1423	30.723	32.5963	30.139	33.9908	32.1018	30.6709	31.0586	26.8206	22.2178	25.5323	26.6693	25.1386	25.5046	19.6788	18.1053	20.1962	19.3638	18.2961	18.6505
D12	2313	hsa-miR-139-3p	31.8751	30.9734	30.1698	31.8523	30.3334	Undetermined	26.8597	28.4707	30.4648	30.0395	33.2138	30.7032	Undetermined	26.8028	28.0285	25.0667	23.3282	26.7845	26.2917	24.2703	26.6748	25.5185	23.7404	23.8769
D13	2289	hsa-miR-139-5p	27.1186	26.0279	24.9963	25.9219	25.461	27.9853	23.7686	24.8138	25.5186	25.5969	26.206	24.8858	22.0848	19.9299	21.1014	19.5913	18.2203	20.3233	20.2575	18.9768	21.1346	20.2351	18.5809	18.6963
D14	2234	hsa-miR-140-3p	29.2797	28.848	28.8748	29.6561	28.6535	29.169	25.9724	27.4959	27.6833	27.0853	28.4458	26.7439	25.5214	23.3168	25.2647	24.3169	23.2838	23.8883	25.2777	24.0093	25.6729	24.7044	23.0958	23.1221
D15	1187	hsa-miR-140	26.7384	25.6836	25.2442	25.9704	24.9692	26.7653	23.7876	24.343	24.2869	24.6973	25.5873	22.2047	20.4776	18.7713	20.3472	19.8965	19.2125	19.7269	20.0818	19.761	20.681	19.8809	19.9885	18.4962
D16	463	hsa-miR-141	33.8137	31.62	31.7921	31.1859	33.0341	34.2638	31.5177	30.4268	33.1083	32.4721	32.6371	31.023	31.9795	27.5674	29.5774	30.1795	26.9759	28.3906	22.6661	22.7051	23.6725	22.2116	23.8359	21.1755
D17	464	hsa-miR-142-3p	24.9375	23.7631	22.4658	23.4819	22.9936	24.2175	22.7727	23.6792	22.6665	22.5301	22.7738	21.689	19.9002	18.6893	20.2199	21.348	22.7958	18.9357	23.1989	21.9616	23.6707	22.8707	24.0219	19.9797
D18	2248	hsa-miR-142-5p	29.1838	28.5236	27.8744	28.4526	27.4492	28.9982	26.896	28.3949	26.635	27.62	28.2357	26.2171	24.9222	23.766	25.2103	26.7198	27.962	24.7109	27.9608	27.1236	29.9162	28.5753	30.0707	25.9757
D19	2249	hsa-miR-143	29.401	28.9829	27.9785	28.1156	27.9569	29.1999	27.3537	27.1482	26.4238	26.4718	29.0003	25.248	20.1181	18.1195	18.9383	18.5621	17.9731	18.6872	19.4445	18.2673	20.0543	18.9326	18.8766	17.4478
D2	456	hsa-miR-130b	29.4541	28.3307	27.5171	28.5224	27.307	29.6844	27.0079	28.8941	26.4043	26.8492	27.2342	26.4835	24.9032	22.939	24.4975	24.411	24.3444	24.3632	25.3618	24.4512	26.2901	25.1703	24.4513	23.9606
D20	2278	hsa-miR-145	28.5529	27.6593	26.9747	27.0999	26.9913	28.8995	26.4686	28.2881	26.036	25.8316	27.7529	25.9257	17.8205	15.9466	16.3435	15.8529	14.3036	16.3467	16.4673	15.2075	17.7748	16.2766	14.9731	15.2118
D21	468	hsa-miR-146a	22.5703	21.7442	21.6427	22.1813	21.2773	23.6931	18.8065	20.517	20.3691	20.9711	22.0656	19.7416	18.4866	16.7553	18.4296	18.552	17.5596	18.1185	18.8467	18.2323	20.2395	19.1388	18.37	17.2761
D22	2361	hsa-miR-146b-3p	33.5172	Undetermined	36.507	34.6576	34.2733	33.6222	Undetermined	Undetermined	Undetermined	36.6995	34.994	Undetermined	26.9289	26.4808	28.2713	28.6672	28.8992	27.3648	26.4756	26.6437	29.3965	27.9919	26.8226	27.3974
D23	1097	hsa-miR-146b	25.9915	25.4108	25.0005	26.203	24.7762	25.7287	23.365	24.1744	24.7515	25.2286	26.2534	24.1333	17.8023	17.5799	19.3054	19.6021	20.9862	19.0373	18.7461	17.8675	20.9753	19.4362	19.182	Undetermined
D24	2262	hsa-miR-147b	Undetermined	Undetermined	Undetermined	Undetermined	Undetermined	Undetermined	Undetermined	Undetermined	Undetermined	Undetermined	Undetermined	Undetermined	34.9483	33.7125	34.8898	Undetermined	Undetermined	34.8974	Undetermined	Undetermined	Undetermined	Undetermined	Undetermined	Undetermined
D3	457	hsa-miR-132	28.095	26.4513	26.4505	27.061	26.41	27.6209	25.8794	27.2592	25.7626	26.2902	26.6488	24.2246	21.2287	18.1191	19.9739	20.5517	19.0041	19.9413	19.5115	18.9765	21.6334	20.6516	19.4344	18.8829
D4	2246	hsa-miR-133a	29.5186	29.635	29.2017	29.4433	30.1653	30.4197	23.7694	26.3844	27.8505	26.5736	28.479	29.5887	24.6247	22.8299	24.0006	23.5092	23.2673	24.6768	23.2469	21.3052	24.168	22.5708	21.638	21.4412
D5	2247	hsa-miR-133b	Undetermined	Undetermined	Undetermined	33.5361	Undetermined	Undetermined	29.9946	Undetermined	33.3147	31.4821	33.4547	Undetermined	28.6376	27.3431	29.02	28.4359	27.6929	29.7981	27.7225	25.9872	27.9605	26.5505	26.0294	26.126
D6	1186	hsa-miR-134	30.8229	30.0772	30.5497	29.9201	32.2721	34.7804	26.4725	30.5877	30.0108	30.3423	32.8813	31.9948	30.5129	25.8479	30.9859	29.7196	27.8367	32.2143	27.3506	25.7713	29.1135	28.9098	26.2994	27.4306
D7	460	hsa-miR-135a	Undetermined	Undetermined	34.3387	34.653	33.586	Undetermined	Undetermined	Undetermined	33.5938	35.399	Undetermined	Undetermined	27.3784	22.0079	27.3176	24.8256	24.4868	28.6626	21.9066	22.9995	22.8813	22.0465	22.2178	20.8514
D8	2261	hsa-miR-135b	Undetermined	Undetermined	34.0394	Undetermined	Undetermined	Undetermined	Undetermined	33.7637	Undetermined	Undetermined	35.2152	34.0053	23.2773	23.278	24.2884	25.0002	23.3223	22.8405	22.6629	21.7678	24.3514	22.7576	23.2995	21.3868
D9	592	hsa-miR-136	Undetermined	Undetermined	Undetermined	Undetermined	Undetermined	Undetermined	34.0372	39.9951	Undetermined	Undetermined	39.157	Undetermined	Undetermined	34.0769	38.488	36.4227	Undetermined	Undetermined	34.0141	33.6825	34.2376	38.8035	Undetermined	33.7598
E1	470	hsa-miR-148a	30.0323	27.7454	27.3715	27.2407	26.4758	28.7997	Undetermined	28.1783	26.0401	26.3148	26.7275	24.6846	22.6612	22.4009	22.4272	22.1471	22.9667	21.2318	24.201	22.1346	23.2117	21.8669	21.8904	20.959
E10	2334	hsa-miR-182	35.0932	34.6559	33.3577	34.9109	33.9304	34.5689	32.3326	35.1436	37.0519	33.0859	35.7848	33.2183	31.4164	28.4877	29.1081	31.8223	30.5971	30.4842	28.6525	26.9827	29.7471	28.5625	27.5292	27.2817
E11	1006	RNU48	33.6543	35.4396	32.2433	33.9915	30.2945	28.4845	24.3942	25.8146	30.2905	32.4565	28.5693	28.516	17.947	15.8496	16.7585	16.7178	15.6778	16.9533	17.5155	15.441	16.7881	16.0787	14.1508	15.5352
E12	2269	hsa-miR-183	34.1981	33.0472	31.8401	32.2447	32.5136	33.9206	31.7374	33.7749	32.1542	31.6357	33.5613	32.6	33.0738	30.3605	30.6555	32.8909	31.652	31.1025	30.3192	27.818	30.2328	29.5001	28.0479	27.9856
E13	485	hsa-miR-184	Undetermined	32.8143	Undetermined	Undetermined	Undetermined	Undetermined	Undetermined	Undetermined	34.1331	34.3295	34.9863	Undetermined	33.5235	30.8563	32.763	28.585	29.5272	30.6452	24.548	22.2364	22.9667	21.7202	21.9541	21.8829
E14	2271	hsa-miR-185	27.1309	26.192	26.3601	27.0206	26.2093	27.6331	24.1608	26.0742	25.1575	24.7133	26.3304	25.3049	24.8134	22.5696	24.4066	24.3337	24.2313	23.9725	24.8366	23.7771	24.8873	24.4287	23.6062	22.5902
E15	2285	hsa-miR-186	24.23	23.7812	23.9992	24.6541	23.1825	25.048	21.3395	Undetermined	22.9871	22.6439	24.7044	21.7323	20.8081	19.3878	20.3785	20.4197	20.2281	19.5013	20.9238	20.0139	21.551	20.1511	19.5749	18.7559
E16	1193	hsa-miR-187	Undetermined	Undetermined	Undetermined	Undetermined	Undetermined	Undetermined	Undetermined	Undetermined	Undetermined	Undetermined	Undetermined	Undetermined	27.4358	Undetermined	27.1492	29.7079	28.2871	26.5816	24.6714	23.6414	23.0998	23.7169	22.1841	22.2215
E17	2106	hsa-miR-188-3p	Undetermined	Undetermined	Undetermined	Undetermined	Undetermined	Undetermined	Undetermined	Undetermined	Undetermined	Undetermined	Undetermined	Undetermined	Undetermined	Undetermined	Undetermined	Undetermined	Undetermined	Undetermined	Undetermined	Undetermined	Undetermined	Undetermined	Undetermined	Undetermined
E18	489	hsa-miR-190	34.6398	Undetermined	31.9393	33.1339	32.2918	31.5396	35.0189	Undetermined	30.4902	30.8131	32.6855	30.5836	24.9998	26.977	25.2469	24.4684	26.3309	23.9009	25.1716	24.6738	25.0422	23.9756	24.4228	22.4335
E19	2299	hsa-miR-191	22.3923	21.9149	21.1211	21.9736	20.9732	23.1868	18.7344	20.4539	20.1354	20.9754	21.8861	19.612	18.9988	16.6922	17.9917	18.3115	17.4947	17.8679	18.4861	16.8578	18.6603	17.7978	16.3322	16.4848
E2	471	hsa-miR-148b	31.2552	30.3445	29.4946	30.0518	29.8501	32.2984	29.7244	30.6236	28.6483	29.0572	29.7569	27.7901	27.052	26.3259	26.7601	26.255	26.5013	26.517	28.2487	26.3402	26.9506	26.5621	26.1875	25.4581
E20	491	hsa-miR-192	26.1614	25.1225	26.1168	25.6985	23.787	26.1026	23.7876	24.7812	24.978	24.7047	26.5426	24.7557	18.336	19.2627	18.8663	18.6607	17.956	18.0204	17.542	17.5675	17.7325	17.4653	16.5748	15.962
E21	2250	hsa-miR-193a-3p	Undetermined	Undetermined	Undetermined	Undetermined	34.959	Undetermined	38.8502	Undetermined	38.2796	Undetermined	Undetermined	Undetermined	27.3994	28.0323	27.824	29.4708	28.3452	25.9928	28.9712	30.1075	29.9858	29.0165	28.2081	27.3741
E22	2281	hsa-miR-193a-5p	31.5557	29.2809	28.731	30.075	26.9925	30.4883	28.6101	28.8036	26.9904	28.3649	27.8741	25.6873	22.703	21.5734	22.3334	22.5406	21.5306	21.3341	23.57	22.5019	23.8572	22.9726	21.7087	22.1941
E23	2367	hsa-miR-193b	28.1759	29.702	28.6139	29.547	25.9759	29.0185	28.0154	26.7649	28.9105	27.9652	29.81	28.545	20.1536	18.5181	19.9238	20.1769	20.2429	20.0531	19.4484	18.9377	20.0778	19.4329	18.0852	18.8465
E24	493	hsa-miR-194	30.6219	29.9588	30.4603	30.4942	28.9379	30.003	27.483	28.3054	28.696	28.8186	29.9947	28.3816	19.9438	21.099	20.1381	19.8347	19.6334	19.297	18.8621	18.8889	19.5607	18.9614	17.9432	17.3894
E3	2255	hsa-miR-149	Undetermined	Undetermined	Undetermined	Undetermined	Undetermined	Undetermined	Undetermined	Undetermined	Undetermined	Undetermined	Undetermined	Undetermined	26.3315	24.4205	Undetermined	24.6789	23.5909	23.5475	23.7752	22.0992	23.8275	22.8039	21.2591	22.0793
E4	473	hsa-miR-150	22.4435	21.2976	21.4199	22.8799	20.4587	20.98	19.5246	20.3636	22.2575	23.2818	24.2393	21.9173	17.1551	14.7458	16.8131	17.8274	17.7623	16.4534	18.928	16.4425	20.9676	18.7337	16.9876	16.1871
E5	475	hsa-miR-152	28.5515	27.2584	26.9444	27.74	26.5292	29.0064	26.0865	27.2725	25.9285	26.3018	27.6555	25.7824	21.5585	20.5575	21.4041	20.8385	20.7403	20.1521	21.4463	20.7452	21.5123	20.6538	19.8983	19.2834
E6	1191	hsa-miR-153	Undetermined	39.201	Undetermined	Undetermined	Undetermined	Undetermined	Undetermined	Undetermined	Undetermined	Undetermined	Undetermined	Undetermined	Undetermined	36.3623	Undetermined	Undetermined	Undetermined	Undetermined	Undetermined	35.7719	37.5731	Undetermined	Undetermined	35.8546
E7	477	hsa-miR-154	Undetermined	Undetermined	Undetermined	Undetermined	Undetermined	Undetermined	Undetermined	Undetermined	Undetermined	Undetermined	Undetermined	Undetermined	Undetermined	Undetermined	Undetermined	Undetermined	Undetermined	Undetermined	32.399	33.0742	Undetermined	Undetermined	32.0276	33.185
E8	480	hsa-miR-181a	30.8616	30.2829	28.8333	29.5704	29.7702	30.4519	28.2112	29.8	28.2429	28.8063	30.399	28.7991	21.9608	19.9487	22.0885	22.0863	20.5462	20.9323	23.6494	21.7914	23.0995	21.9715	21.2288	20.9425
E9	482	hsa-miR-181c	38.5343	35.2829	35.5143	37.0733	36.3961	36.376	33.8705	33.4936	32.474	35.5009	36.2387	33.4057	27.5982	25.4052	28.2768	27.9367	26.7218	27.2331	28.4452	27.4678	29.4332	27.9432	27.3694	27.1832
F1	494	hsa-miR-195	26.158	24.3971	24.8201	24.7011	24.6776	25.4402	22.8069	24.682	23.6263	23.2774	24.9191	23.598	18.5708	17.4795	18.8687	18.4408	18.285	18.6207	20.7494	18.8396	20.8207	18.999	18.9512	Undetermined
F10	2300	hsa-miR-200c	33.458	32.0423	30.3034	32.585	33.161	33.725	29.396	33.0195	30.3388	31.6641	32.9589	29.8465	Undetermined	25.7746	Undetermined	Undetermined	25.4955	28.7232	Undetermined	20.2446	20.915	20.537	19.3373	Undetermined
F11	2363	hsa-miR-202	Undetermined	34.1163	32.7622	Undetermined	31.7971	Undetermined	Undetermined	Undetermined	Undetermined	31.7492	Undetermined	35.1945	31.1426	30.2443	33.7227	31.3749	Undetermined	31.2266	Undetermined	31.7642	31.1902	31.9921	32.0098	Undetermined
F12	507	hsa-miR-203	Undetermined	Undetermined	32.3058	32.2663	30.7337	31.3634	Undetermined	29.5537	33.6549	32.4444	31.9172	30.6455	22.8292	23.3933	24.2623	22.6804	22.9892	24.4418	Undetermined	22.918	23.9244	21.7998	21.4333	Undetermined
F13	508	hsa-miR-204	30.7709	30.5932	29.4464	31.4403	30.0867	30.5706	28.4463	Undetermined	29.8611	29.1687	29.3992	29.8131	16.9866	23.1195	18.0814	16.8075	16.5849	16.4682	Undetermined	15.1148	16.3463	15.4013	14.6794	Undetermined
F14	509	hsa-miR-205	34.7462	Undetermined	34.8165	32.789	34.5238	Undetermined	33.4154	Undetermined	Undetermined	Undetermined	34.0103	Undetermined	Undetermined	30.1336	Undetermined	33.384	Undetermined	31.6062	Undetermined	29.4673	Undetermined	30.3124	28.8589	Undetermined
F15	2290	hsa-miR-208b	Undetermined	Undetermined	Undetermined	Undetermined	Undetermined	Undetermined	Undetermined	Undetermined	Undetermined	Undetermined	Undetermined	Undetermined	Undetermined	Undetermined	Undetermined	Undetermined	Undetermined	Undetermined	Undetermined	Undetermined	Undetermined	Undetermined	Undetermined	Undetermined
F16	512	hsa-miR-210	30.4758	29.1899	29.4271	Undetermined	29.6187	Undetermined	25.7748	28.3922	27.9946	26.878	29.6996	29.9228	18.5977	18.9691	19.8751	19.1207	18.7398	18.6473	Undetermined	22.9413	Undetermined	22.6983	21.5811	Undetermined
F17	2306	hsa-miR-214	33.0245	33.506	32.9564	32.9729	33.1219	34.2492	Undetermined	Undetermined	Undetermined	29.6166	33.2044	Undetermined	23.9864	21.126	22	21.8008	20.2477	22.6278	Undetermined	19.8203	Undetermined	20.9341	19.667	Undetermined
F18	518	hsa-miR-215	31.5295	26.8373	29.7671	28.0774	30.0883	30.7119	Undetermined	Undetermined	30.0435	31.2054	30.8244	30.8745	Undetermined	Undetermined	Undetermined	23.2997	Undetermined	Undetermined	Undetermined	Undetermined	Undetermined	Undetermined	Undetermined	Undetermined
F19	2220	hsa-miR-216a	Undetermined	Undetermined	Undetermined	Undetermined	33.9108	Undetermined	Undetermined	Undetermined	Undetermined	Undetermined	Undetermined	Undetermined	Undetermined	30.6292	Undetermined	29.4197	26.7119	Undetermined	Undetermined	27.9085	Undetermined	26.6999	26.3996	Undetermined
F2	2215	hsa-miR-196b	Undetermined	33.0807	33.3261	Undetermined	31.6653	32.5472	31.1662	33.6899	33.7092	33.6454	34.321	31.5694	23.7541	21.415	24.6064	22.742	23.4857	22.037	23.4903	21.4191	23.3618	22.1757	21.6046	21.3118
F20	2326	hsa-miR-216b	Undetermined	Undetermined	Undetermined	Undetermined	Undetermined	Undetermined	Undetermined	Undetermined	35.7654	Undetermined	Undetermined	Undetermined	Undetermined	28.9123	Undetermined	Undetermined	30.3124	36.742	Undetermined	Undetermined	Undetermined	24.7214	22.9363	Undetermined
F21	2337	hsa-miR-217	Undetermined	Undetermined	Undetermined	Undetermined	36.1107	Undetermined	Undetermined	Undetermined	Undetermined	Undetermined	Undetermined	Undetermined	Undetermined	30.4912	34.0743	30.4736	27.9557	Undetermined	Undetermined	Undetermined	Undetermined	27.2827	26.3103	Undetermined
F22	521	hsa-miR-218	30.5404	Undetermined	30.1461	31.9537	30.7654	Undetermined	33.2211	29.9776	31.0342	31.5593	32.0422	28.871	Undetermined	20.8883	Undetermined	21.8508	21.5586	21.8469	Undetermined	Undetermined	Undetermined	19.9062	19.5094	Undetermined
F23	522	hsa-miR-219	Undetermined	Undetermined	Undetermined	Undetermined	Undetermined	Undetermined	Undetermined	Undetermined	Undetermined	Undetermined	Undetermined	Undetermined	Undetermined	Undetermined	Undetermined	Undetermined	Undetermined	36.0261	Undetermined	Undetermined	Undetermined	32.4205	32.6906	Undetermined
F24	524	hsa-miR-221	27.7078	25.2838	24.3218	25.3453	24.7094	Undetermined	Undetermined	Undetermined	23.4419	Undetermined	25.8797	23.6556	Undetermined	Undetermined	Undetermined	Undetermined	21.9833	22.4288	Undetermined	Undetermined	Undetermined	21.6991	20.5912	Undetermined
F3	497	hsa-miR-197	26.5887	25.7539	25.3843	25.9513	24.6917	27.4123	22.5624	23.6663	24.2492	25.0316	26.0992	23.6085	23.4283	21.4137	22.7506	22.6547	21.3144	21.3506	23.191	20.988	24.6571	22.9258	20.4142	21.7763
F4	2273	hsa-miR-198	Undetermined	Undetermined	Undetermined	Undetermined	Undetermined	Undetermined	Undetermined	Undetermined	Undetermined	36.1019	Undetermined	Undetermined	30.4181	28.2745	30.2589	Undetermined	32.3689	28.8164	Undetermined	34.6178	Undetermined	Undetermined	33.5422	33.4023
F5	498	hsa-miR-199a	33.0954	31.5539	33.1658	Undetermined	31.5863	Undetermined	31.3882	34.4147	30.3811	32.4886	31.9457	33.1699	29.2683	26.608	27.2094	26.9176	25.925	28.213	27.0186	25.8861	27.0994	25.7536	25.7592	24.907
F6	2304	hsa-miR-199a-3p	27.6157	25.2197	24.5059	25.7713	24.5354	27.0116	23.6595	25.2684	23.3328	24.2057	25.3357	23.7058	22.5407	19.2795	20.7313	20.4826	19.5874	21.64	19.9135	18.9338	21.1215	19.2409	19.5737	18.3352
F7	500	hsa-miR-199b	36.8027	36.7106	36.4292	Undetermined	38.0337	33.5102	33.6616	32.6031	36.9926	Undetermined	34.9738	Undetermined	32.1738	28.9046	28.632	29.0354	28.3572	31.9435	29.1182	27.89	29.1964	28.3317	28.2246	27.2682
F8	502	hsa-miR-200a	Undetermined	Undetermined	Undetermined	Undetermined	Undetermined	Undetermined	Undetermined	Undetermined	Undetermined	Undetermined	Undetermined	Undetermined	21.0616	22.2509	21.3854	21.2103	20.5826	20.2334	Undetermined	19.6942	20.082	19.0854	19.7999	17.9012
F9	2251	hsa-miR-200b	Undetermined	32.3349	Undetermined	32.6509	33.4006	Undetermined	31.3695	Undetermined	33.1474	34.3947	33.3653	33.5674	22.0939	22.5352	21.4062	21.5518	20.8203	20.6514	Undetermined	19.1016	19.866	19.1397	19.0093	Undetermined
G1	2276	hsa-miR-222	23.0552	22.8676	22.3162	23.4595	22.1432	24.0866	20.4154	20.9914	21.8051	21.1619	23.2542	20.4048	17.9978	15.4994	18.0633	18.1496	17.2488	17.2825	18.8379	16.7965	18.4253	17.7307	17.2163	16.2674
G10	529	hsa-miR-302a	Undetermined	Undetermined	Undetermined	Undetermined	Undetermined	Undetermined	Undetermined	Undetermined	Undetermined	Undetermined	Undetermined	Undetermined	Undetermined	31.814	35.3592	Undetermined	31.1881	Undetermined	Undetermined	Undetermined	34.4981	31.7547	32.4432	30.577
G11	338	ath-miR159a	Undetermined	Undetermined	Undetermined	Undetermined	Undetermined	Undetermined	Undetermined	Undetermined	Undetermined	Undetermined	Undetermined	Undetermined	Undetermined	Undetermined	Undetermined	Undetermined	Undetermined	Undetermined	Undetermined	Undetermined	Undetermined	Undetermined	Undetermined	Undetermined
G12	531	hsa-miR-302b	Undetermined	Undetermined	Undetermined	Undetermined	Undetermined	Undetermined	Undetermined	Undetermined	Undetermined	Undetermined	Undetermined	Undetermined	Undetermined	31.4208	Undetermined	Undetermined	32.3745	Undetermined	32.0033	33.9663	32.0062	29.4168	29.9582	29.9246
G13	533	hsa-miR-302c	Undetermined	Undetermined	Undetermined	Undetermined	Undetermined	Undetermined	Undetermined	Undetermined	Undetermined	Undetermined	Undetermined	Undetermined	32.7214	35.4978	Undetermined	Undetermined	Undetermined	Undetermined	32.2087	Undetermined	Undetermined	30.8401	Undetermined	33.0497
G14	2277	hsa-miR-320	22.9651	22.9455	23.0597	23.8179	22.5972	24.0975	19.8462	20.9177	21.9417	21.1883	22.7199	21.3516	19.3795	18.1845	19.34	18.788	18.2668	18.459	19.2911	18.3166	19.9489	19.2177	18.5372	18.3037
G15	2227	hsa-miR-323-3p	32.46	30.8912	31.1812	31.0772	32.462	31.9186	29.8201	32.1248	30.178	31.6798	32.2344	31.0985	31.6695	27.5603	31.7372	31.0135	29.9522	31.5705	27.0221	27.0776	31.4811	29.2676	28.838	29.1257
G16	2161	hsa-miR-324-3p	29.8429	28.9525	29.0651	30.1492	28.6638	30.0824	26.7016	28.1157	27.972	27.3761	29.8366	27.1832	24.3744	23.2041	24.3359	24.1106	23.5567	23.4832	23.6638	22.9134	23.6071	23.3699	22.1502	22.2234
G17	539	hsa-miR-324-5p	29.5656	28.3006	28.2564	29.8003	29.5256	30.9091	26.7286	28.5119	26.9911	27.749	28.6322	26.9024	23.3068	22.2399	22.9805	22.9927	22.6627	22.4881	21.7918	21.6419	22.4234	22.0887	21.4349	21.1283
G18	542	hsa-miR-326	Undetermined	Undetermined	Undetermined	35.5165	Undetermined	Undetermined	36.035	Undetermined	33.6563	36.6985	37.6759	34.7376	Undetermined	33.6501	34.4305	35.013	31.948	32.2269	Undetermined	35.2137	34.326	34.8924	32.8789	32.5651
G19	543	hsa-miR-328	27.9494	25.5999	25.1195	25.7118	24.9784	27.294	25.0204	26.3037	24.2718	24.8533	25.678	24.0866	22.3849	21.4391	22.0202	20.9875	20.0684	20.4633	21.2387	20.0157	21.5083	20.944	18.7181	19.9749
G2	2295	hsa-miR-223	18.2333	16.7486	15.7303	16.6412	15.6351	17.6989	14.9147	15.3327	14.874	15.8153	16.8186	12.9771	17.8195	15.5499	17.0202	17.3952	17.1872	16.2546	19.0098	16.9328	19.2392	19.0117	18.2076	16.5703
G20	1101	hsa-miR-329	38.8436	32.6572	Undetermined	34.6137	Undetermined	Undetermined	33.1765	Undetermined	34.9741	37.8827	Undetermined	36.7099	34.9868	30.963	Undetermined	34.7689	32.8859	37.9005	33.1632	31.966	36.4362	33.4779	32.8197	34.2287
G21	544	hsa-miR-330	34.0425	33.1954	33.2266	33.1816	33.4614	36.1524	30.4221	31.6358	31.0616	31.8217	33.743	31.3719	29.1738	28.2131	29.0755	28.9977	28.2604	28.5722	29.5428	28.5517	30.7844	29.5915	27.6521	28.2502
G22	2230	hsa-miR-330-5p	Undetermined	Undetermined	Undetermined	Undetermined	Undetermined	Undetermined	Undetermined	Undetermined	Undetermined	Undetermined	Undetermined	Undetermined	Undetermined	Undetermined	Undetermined	Undetermined	32.9237	Undetermined	Undetermined	Undetermined	Undetermined	Undetermined	Undetermined	33.9472
G23	545	hsa-miR-331	27.0188	25.6983	25.2069	26.268	25.1433	26.9568	23.7712	25.6224	24.5557	25.1048	25.8126	23.939	19.7504	18.345	19.1282	18.6685	18.0409	18.6362	19.0271	18.5756	20.0337	19.1736	17.5862	17.5193
G24	2233	hsa-miR-331-5p	Undetermined	Undetermined	Undetermined	Undetermined	Undetermined	Undetermined	Undetermined	Undetermined	Undetermined	Undetermined	Undetermined	Undetermined	28.7506	28.291	28.9269	29.0077	28.2903	28.0101	28.1648	28.7248	28.5752	28.3091	27.0932	27.0464
G3	2099	hsa-miR-224	34.0718	29.2004	30.0852	29.2009	28.3034	33.3896	27.9831	30.4788	27.7646	29.841	31.3353	30.493	24.1978	20.8662	21.6335	22.5185	23.1801	23.245	26.4556	23.4552	27.544	26.038	25.2241	24.9522
G4	2101	hsa-miR-296-3p	Undetermined	Undetermined	Undetermined	Undetermined	Undetermined	Undetermined	Undetermined	Undetermined	Undetermined	Undetermined	Undetermined	Undetermined	Undetermined	Undetermined	Undetermined	Undetermined	Undetermined	Undetermined	Undetermined	Undetermined	Undetermined	Undetermined	30.6665	33.8954
G5	527	hsa-miR-296	33.056	31.0625	33.0399	30.9103	31.1202	32.3377	30.7819	32.0803	30.2823	30.2059	33.2302	32.3828	26.0292	23.737	Undetermined	25.3435	26.5478	25.5408	27.7444	26.2817	27.8765	26.9374	25.2239	25.4294
G6	1015	hsa-miR-299-3p	Undetermined	Undetermined	Undetermined	Undetermined	Undetermined	Undetermined	Undetermined	Undetermined	Undetermined	Undetermined	35.2549	Undetermined	Undetermined	Undetermined	38.1244	Undetermined	Undetermined	Undetermined	Undetermined	Undetermined	Undetermined	Undetermined	Undetermined	Undetermined
G7	600	hsa-miR-299-5p	Undetermined	Undetermined	Undetermined	Undetermined	Undetermined	Undetermined	Undetermined	Undetermined	Undetermined	Undetermined	Undetermined	Undetermined	Undetermined	31.1128	Undetermined	Undetermined	32.1009	Undetermined	32.3396	31.7363	Undetermined	Undetermined	32.4409	32.5826
G8	528	hsa-miR-301	28.807	27.2348	26.6655	27.898	27.3332	28.8063	25.5467	27.8517	25.8932	26.8704	27.2594	25.7157	24.7011	23.6666	24.962	24.1808	25.1718	23.9377	25.0674	24.6088	25.9893	24.9859	23.9707	23.1274
G9	2392	hsa-miR-301b	32.1916	32.9558	30.7853	32.6989	30.9207	33.8087	29.9496	33.5345	29.7498	31.1669	31.7787	29.915	30.3291	27.8717	29.4126	29.1897	30.4153	29.2247	30.7402	29.7748	31.9648	31.3347	29.9346	29.1212
H1	546	hsa-miR-335	29.41	27.1535	26.5655	27.0424	27.1653	28.6969	26.0468	27.6423	25	26.0021	26.3874	25.7789	27.0289	23.2445	25.0074	24.8553	24.8037	26.0482	25.1214	22.8778	24.8753	23.3617	23.6035	22.0048
H10	2147	hsa-miR-342-5p	Undetermined	Undetermined	Undetermined	Undetermined	Undetermined	Undetermined	34.3054	Undetermined	Undetermined	Undetermined	Undetermined	Undetermined	28.944	27.6487	27.0384	28.979	28.4629	27.6899	Undetermined	29.8202	32.1128	30.5114	27.9803	27.7838
H11	2186	hsa-miR-345	27.7692	27.9547	27.2191	27.9296	26.649	28.7492	25.4759	26.0069	25.8696	26.6663	27.0453	24.4446	22.5149	21.6885	22.4603	21.7377	21.5449	22.9881	21.933	21.4629	22.9881	21.7415	20.5939	20.9662
H12	554	hsa-miR-361	31.8953	31.2044	29.6236	30.6319	29.0336	34.4847	28.193	28.3065	27.729	27.6811	29.0777	27.1499	23.7007	22.8992	24.4264	23.183	22.6311	23.2497	23.2505	22.9762	24.4293	23.1046	22.1156	21.8231
H13	2117	hsa-miR-362-3p	Undetermined	34.0468	34.0054	31.7263	30.6759	32.6259	32.2113	Undetermined	30.974	32.4044	33.3476	30.3516	26.9452	26.187	26.896	26.8373	26.2383	25.4886	25.4947	26.0985	27.3503	25.2412	27.4268	23.8768
H14	1273	hsa-miR-362	33.7689	34.1846	34.9857	32.5877	32.0358	34.9931	30.8554	31.0304	33.9724	32.199	32.7176	30.5338	26.1134	24.1824	25.3384	24.9859	24.1566	23.808	23.3893	23.0249	23.3618	22.767	22.1488	21.7244
H15	1271	hsa-miR-363	32.7638	28.8481	30.7672	30.6244	30.0337	31.994	28.7275	33.1085	29.4148	28.8383	30.9145	28.9973	28.5962	26.6072	25.182	26.3111	26.1378	27.0922	25.1138	25.1426	25.052	23.9673	24.227	23.0973
H16	1020	hsa-miR-365	33.2919	30.3075	29.3828	29.928	27.8098	30.0434	29.7533	30.9118	28.1	29.4379	29.3626	27.3556	21.8199	20.9664	21.6222	21.5205	21.1967	20.9345	21.7131	21.4241	23.0754	21.9853	20.5618	20.7002
H17	555	hsa-miR-367	Undetermined	Undetermined	Undetermined	Undetermined	Undetermined	Undetermined	Undetermined	Undetermined	Undetermined	Undetermined	Undetermined	Undetermined	Undetermined	Undetermined	Undetermined	Undetermined	Undetermined	Undetermined	32.7495	35.3664	Undetermined	31.9283	Undetermined	Undetermined
H18	557	hsa-miR-369-3p	Undetermined	Undetermined	Undetermined	35.2123	Undetermined	Undetermined	Undetermined	Undetermined	Undetermined	Undetermined	Undetermined	32.1704	33.7794	29.6613	32.9767	31.7551	Undetermined	Undetermined	30.8094	29.5349	Undetermined	33.1134	Undetermined	34.2231
H19	1021	hsa-miR-369-5p	Undetermined	Undetermined	Undetermined	Undetermined	Undetermined	Undetermined	35.7604	Undetermined	Undetermined	Undetermined	Undetermined	Undetermined	Undetermined	33.3281	35.7408	35.031	30.8345	33.7907	30.6995	31.5697	32.5891	Undetermined	32.7931	31.4344
H2	2156	hsa-miR-337-5p	Undetermined	Undetermined	Undetermined	36.1411	Undetermined	Undetermined	32.6912	Undetermined	32.6854	Undetermined	35.7238	32.5849	29.5981	26.8436	31.2191	30.3982	29.9129	32.7634	27.8068	26.7963	29.5289	28.8135	29.3435	28.0588
H20	2275	hsa-miR-370	30.7989	31.4473	29.2404	34.0841	Undetermined	Undetermined	27.4188	31.9582	30.0137	30.2083	Undetermined	30.8471	Undetermined	26.0757	Undetermined	31.1599	27.4912	Undetermined	25.8371	24.722	28.5715	27.5056	25.7145	27.0307
H21	2124	hsa-miR-371-3p	Undetermined	Undetermined	Undetermined	Undetermined	Undetermined	Undetermined	Undetermined	Undetermined	Undetermined	Undetermined	Undetermined	Undetermined	Undetermined	Undetermined	Undetermined	Undetermined	Undetermined	Undetermined	Undetermined	Undetermined	Undetermined	Undetermined	Undetermined	Undetermined
H22	560	hsa-miR-372	35.1831	34.0863	Undetermined	Undetermined	Undetermined	Undetermined	Undetermined	Undetermined	Undetermined	Undetermined	Undetermined	Undetermined	38.7399	31.9116	34.1994	33.5024	36.3266	Undetermined	33.0869	35.3658	38.2773	33.8048	38.8978	31.8206
H23	561	hsa-miR-373	Undetermined	Undetermined	Undetermined	Undetermined	Undetermined	Undetermined	Undetermined	Undetermined	Undetermined	Undetermined	Undetermined	Undetermined	33.9652	31.1321	Undetermined	36.5826	Undetermined	Undetermined	Undetermined	Undetermined	Undetermined	36.0032	Undetermined	32.6827
H24	563	hsa-miR-374	26.2682	24.8803	24.6144	25.1474	24.2009	25.616	23.13	25.5057	24.0575	24.4244	24.7351	23.2937	20.3068	18.5339	20.0042	19.6939	20.2863	19.5999	20.3252	20.3161	21.556	20.3449	20.635	18.7885
H3	2252	hsa-miR-338-3p	35.6971	32.7188	34.7286	35.7799	32.318	37.2194	33.5403	33.9822	31.9227	34.7328	33.8739	30.1875	28.3872	26.7759	Undetermined	29.2677	28.236	27.6984	27.6295	28.7723	29.4544	27.8644	28.2128	27.5604
H4	2184	hsa-miR-339-3p	29.8322	29.5435	30.2475	30.0635	28.1896	30.7564	25.9237	27.5775	28.2272	27.7051	29.1752	27.1558	25.1972	23.4193	25.946	24.8744	23.826	24.0944	23.9541	23.6308	25.6267	23.9423	22.7617	Undetermined
H5	2257	hsa-miR-339-5p	Undetermined	Undetermined	31.8334	Undetermined	Undetermined	Undetermined	30.6644	Undetermined	30.6987	31.0054	Undetermined	29.7057	25.4477	22.7307	25.5916	24.3861	23.2381	23.0593	25.9887	24.4598	27.0408	24.7495	22.825	22.9786
H6	2258	hsa-miR-340	29.1057	27.7895	26.9558	27.6494	27.0779	28.7078	26.3494	28.4131	25.9357	26.7603	27.9442	25.2861	23.7108	22.3583	23.6368	23.523	23.8455	22.7915	23.8723	23.5108	25.3221	23.9641	23.4349	23.0274
H7	2623	hsa-miR-155	30.1484	29.256	28.9143	29.3625	28.4209	29.4243	26.9537	26.956	28.91	28.5191	29.3343	27.9054	19.0763	17.1507	18.288	21.2758	20.6238	19.5009	22.2152	21.1645	24.4215	22.9088	22.1698	20.9431
H8	2619	hsa-let-7b	27.9045	25.616	25.8464	25.7439	26.5312	27.3707	23.4066	25.5072	24.1336	25.6052	26.3791	24.8095	19.0512	17.8911	18.6748	18.0515	17.2538	16.9794	18.2998	17.2525	17.7419	17.7741	16.3864	16.2838
H9	2260	hsa-miR-342-3p	25.0215	24.6377	24.4093	24.8295	23.7029	24.5478	22.4837	23.0171	24.6461	24.313	25.5781	23.947	19.1668	17.6282	18.3197	19.4185	18.4857	18.7565	20.097	18.9257	20.975	20.1809	18.4356	18.2741
I1	1319	hsa-miR-374-5p	26.7478	25.0897	24.4448	24.8789	24.253	26.3166	23.3653	26.1674	23.9881	24.483	25.0009	23.4127	19.7422	17.6826	19.3921	18.6954	18.9989	19.202	19.0899	18.9831	20.7502	19.2981	18.9864	18.1199
I10	573	hsa-miR-383	Undetermined	Undetermined	Undetermined	Undetermined	Undetermined	Undetermined	Undetermined	Undetermined	37.1694	Undetermined	Undetermined	Undetermined	Undetermined	Undetermined	Undetermined	Undetermined	Undetermined	Undetermined	Undetermined	Undetermined	Undetermined	Undetermined	35.1924	Undetermined
I11	2331	hsa-miR-409-5p	Undetermined	Undetermined	Undetermined	34.2193	Undetermined	Undetermined	Undetermined	Undetermined	32.5391	36.4787	Undetermined	Undetermined	Undetermined	31.0909	Undetermined	34.1567	32.3969	Undetermined	29.1726	29.1116	Undetermined	31.5813	31.3046	32.0652
I12	1274	hsa-miR-410	30.4471	28.5092	28.4049	28.8538	30.9465	32.3847	27.1416	30.3241	28.3775	29.4138	32.3863	28.3879	27.7336	24.857	29.0571	27.821	26.9163	29.4376	24.6917	24.7207	29.3902	27.4758	28.0694	26.5307
I13	1610	hsa-miR-411	30.4792	29.3725	29.1129	29.0538	33.6454	34.3898	28.0803	Undetermined	29.9997	29.6758	34.0757	29.2233	26.5913	22.8415	27.6061	26.8384	26.1773	28.9332	23.5126	23.8888	26.565	25.2545	25.3282	24.2063
I14	2297	hsa-miR-422a	33.2797	Undetermined	32.1546	34.9489	31.8635	33.9815	31.8552	30.8921	32.3418	32.3294	34.5873	32.4563	28.1276	25.7567	26.9519	27.6468	29.0747	27.7774	25.4908	24.5373	25.9608	25.5767	25.379	25.5227
I15	2340	hsa-miR-423-5p	30.0927	29.0119	28.6268	28.6527	28.7024	30.1153	26.8237	27.5215	26.6125	27.2157	28.0143	27.9466	25.6386	24.7618	25.9754	25.1954	24.5176	24.7646	24.6526	24.8785	25.6069	25.2941	24.0152	24.6089
I16	604	hsa-miR-424	Undetermined	Undetermined	32.1101	Undetermined	32.2117	Undetermined	Undetermined	Undetermined	33.5035	Undetermined	31.5133	34.4314	25.8573	25.5805	24.8327	27.7808	26.6122	26.89	25.7637	26.239	26.7284	26.3033	26.4387	25.0327
I17	1516	hsa-miR-425-5p	28.2199	26.7799	26.9209	27.5319	27.1877	29.6033	23.5097	25.4559	25.6708	25.5747	27.221	25.2417	26.4525	23.6454	25.5608	25.8839	25.367	24.8519	24.4389	25.0674	25.5598	25.441	23.9262	23.5075
I18	1024	hsa-miR-429	Undetermined	Undetermined	Undetermined	35.1753	34.0068	38.073	Undetermined	Undetermined	34.078	Undetermined	Undetermined	Undetermined	24.1736	25.693	24.1717	23.942	23.9386	23.3063	21.4319	22.033	22.4798	21.5609	22.7636	20.4367
I19	1979	hsa-miR-431	Undetermined	Undetermined	Undetermined	Undetermined	Undetermined	Undetermined	29.3453	Undetermined	Undetermined	Undetermined	Undetermined	Undetermined	Undetermined	Undetermined	Undetermined	Undetermined	Undetermined	Undetermined	Undetermined	30.1074	Undetermined	Undetermined	Undetermined	Undetermined
I2	564	hsa-miR-375	28.8547	25.5673	28.1879	25.7818	27.4531	28.1539	29.3556	27.4733	27.4019	27.8881	28.3338	27.3464	29.3681	27.9655	25.9723	29.4236	25.8646	28.2752	25.2317	22.441	27.0649	25.1582	22.9819	23.6828
I20	1028	hsa-miR-433	Undetermined	30.1457	32.5564	32.938	34.3268	Undetermined	28.068	31.397	31.717	32.8633	33.7545	Undetermined	31.2416	27.9168	33.4744	31.2605	28.1439	33.455	26.9691	Undetermined	Undetermined	31.2084	27.9064	28.4042
I21	1030	hsa-miR-449	Undetermined	Undetermined	Undetermined	Undetermined	Undetermined	Undetermined	34.0663	Undetermined	Undetermined	39.969	Undetermined	33.8388	32.5251	28.4387	29.9727	30.5206	29.9786	29.4009	Undetermined	26.7921	31.7038	32.318	30.8585	30.3822
I22	1608	hsa-miR-449b	Undetermined	Undetermined	Undetermined	Undetermined	Undetermined	Undetermined	Undetermined	Undetermined	Undetermined	Undetermined	Undetermined	Undetermined	31.6526	29.0704	30.008	30.4237	29.6021	29.9125	30.693	Undetermined	35.1577	31.5139	31.2308	31.1075
I23	2303	hsa-miR-450a	Undetermined	Undetermined	Undetermined	Undetermined	Undetermined	Undetermined	33.7588	Undetermined	Undetermined	37.8588	Undetermined	32.2823	28.626	27.8591	26.9378	30.33	28.6131	28.9778	27.3489	28.3592	28.9437	27.8225	28.4175	26.7958
I24	2208	hsa-miR-450b-3p	Undetermined	Undetermined	Undetermined	Undetermined	Undetermined	Undetermined	Undetermined	Undetermined	Undetermined	Undetermined	Undetermined	Undetermined	Undetermined	Undetermined	Undetermined	Undetermined	Undetermined	Undetermined	Undetermined	Undetermined	Undetermined	Undetermined	Undetermined	Undetermined
I3	565	hsa-miR-376a	28.8756	27.2979	27.6514	27.8973	30.5891	33.8406	25.6052	30.3715	27.5005	28.4901	30.5467	28.5756	27.1624	22.805	27.5839	26.692	26.1503	29.4456	24.3124	24.1333	27.6949	26.3255	26.2349	25.0877
I4	1102	hsa-miR-376b	Undetermined	Undetermined	Undetermined	Undetermined	Undetermined	Undetermined	Undetermined	Undetermined	32.384	Undetermined	Undetermined	Undetermined	32.0171	30.704	Undetermined	Undetermined	Undetermined	Undetermined	29.9713	31.9031	Undetermined	32.1924	Undetermined	31.647
I5	566	hsa-miR-377	Undetermined	Undetermined	Undetermined	33.2546	Undetermined	Undetermined	Undetermined	Undetermined	Undetermined	Undetermined	Undetermined	Undetermined	Undetermined	Undetermined	Undetermined	Undetermined	Undetermined	Undetermined	32.8433	33.2519	Undetermined	35.267	Undetermined	Undetermined
I6	1138	hsa-miR-379	Undetermined	31.9384	30.9331	31.0023	32.8894	Undetermined	29.7036	Undetermined	Undetermined	32.5687	Undetermined	31.6605	27.7325	23.6553	29.6396	27.8435	26.3367	30.9244	24.5895	24.4703	27.742	27.0291	25.9402	25.5354
I7	569	hsa-miR-380-3p	Undetermined	Undetermined	Undetermined	Undetermined	Undetermined	Undetermined	Undetermined	Undetermined	Undetermined	Undetermined	Undetermined	Undetermined	Undetermined	Undetermined	Undetermined	Undetermined	Undetermined	Undetermined	Undetermined	Undetermined	Undetermined	Undetermined	Undetermined	Undetermined
I8	571	hsa-miR-381	Undetermined	Undetermined	Undetermined	Undetermined	Undetermined	Undetermined	Undetermined	30.8923	33.9805	Undetermined	Undetermined	32.4451	30.9544	30.1171	32.1845	33.1983	30.9541	Undetermined	30.1609	30.9509	32.257	Undetermined	34.1894	30.4323
I9	572	hsa-miR-382	Undetermined	29.1832	29.0919	27.8346	Undetermined	Undetermined	25.737	Undetermined	28.8398	30.4203	Undetermined	30.9096	28.9114	23.0675	Undetermined	27.7824	26.4011	29.4917	24.55	24.2894	27.8848	27.0178	24.4898	24.9133
J1	2207	hsa-miR-450b-5p	Undetermined	Undetermined	Undetermined	Undetermined	Undetermined	Undetermined	Undetermined	Undetermined	Undetermined	Undetermined	Undetermined	31.8626	Undetermined	Undetermined	Undetermined	Undetermined	Undetermined	Undetermined	Undetermined	29.3276	Undetermined	Undetermined	Undetermined	Undetermined
J10	1277	hsa-miR-485-3p	31.7467	30.1893	32.0851	28.6519	Undetermined	Undetermined	Undetermined	Undetermined	30.3153	Undetermined	Undetermined	Undetermined	Undetermined	Undetermined	Undetermined	Undetermined	Undetermined	Undetermined	Undetermined	Undetermined	Undetermined	Undetermined	Undetermined	Undetermined
J11	1036	hsa-miR-485-5p	Undetermined	Undetermined	Undetermined	Undetermined	Undetermined	Undetermined	Undetermined	Undetermined	Undetermined	Undetermined	Undetermined	Undetermined	Undetermined	Undetermined	Undetermined	Undetermined	Undetermined	Undetermined	Undetermined	Undetermined	Undetermined	Undetermined	Undetermined	Undetermined
J12	2093	hsa-miR-486-3p	Undetermined	30.5066	34.1999	31.8856	Undetermined	Undetermined	Undetermined	Undetermined	29.559	Undetermined	Undetermined	Undetermined	Undetermined	Undetermined	Undetermined	Undetermined	Undetermined	Undetermined	Undetermined	Undetermined	Undetermined	Undetermined	Undetermined	Undetermined
J13	1278	hsa-miR-486	Undetermined	25.497	26.706	Undetermined	Undetermined	Undetermined	Undetermined	24.7887	24.3629	Undetermined	Undetermined	Undetermined	Undetermined	Undetermined	Undetermined	Undetermined	Undetermined	Undetermined	Undetermined	Undetermined	Undetermined	Undetermined	Undetermined	Undetermined
J14	1279	hsa-miR-487a	Undetermined	33.9578	Undetermined	Undetermined	Undetermined	Undetermined	Undetermined	Undetermined	Undetermined	Undetermined	Undetermined	Undetermined	Undetermined	Undetermined	Undetermined	Undetermined	Undetermined	Undetermined	Undetermined	Undetermined	Undetermined	Undetermined	Undetermined	Undetermined
J15	1285	hsa-miR-487b	Undetermined	30.8611	31.1422	Undetermined	Undetermined	Undetermined	Undetermined	32.6234	31.5569	Undetermined	Undetermined	Undetermined	Undetermined	Undetermined	Undetermined	Undetermined	Undetermined	Undetermined	Undetermined	Undetermined	Undetermined	Undetermined	Undetermined	Undetermined
J16	2357	hsa-miR-488	Undetermined	Undetermined	Undetermined	Undetermined	Undetermined	Undetermined	Undetermined	Undetermined	Undetermined	Undetermined	Undetermined	Undetermined	Undetermined	Undetermined	Undetermined	Undetermined	Undetermined	Undetermined	Undetermined	Undetermined	Undetermined	Undetermined	Undetermined	Undetermined
J17	2358	hsa-miR-489	Undetermined	33.8828	Undetermined	Undetermined	Undetermined	Undetermined	Undetermined	Undetermined	Undetermined	Undetermined	Undetermined	Undetermined	Undetermined	Undetermined	Undetermined	Undetermined	Undetermined	Undetermined	Undetermined	Undetermined	Undetermined	Undetermined	Undetermined	Undetermined
J18	1037	hsa-miR-490	Undetermined	Undetermined	Undetermined	Undetermined	Undetermined	Undetermined	Undetermined	Undetermined	Undetermined	Undetermined	Undetermined	Undetermined	Undetermined	Undetermined	Undetermined	Undetermined	Undetermined	Undetermined	Undetermined	Undetermined	Undetermined	Undetermined	Undetermined	Undetermined
J19	2360	hsa-miR-491-3p	Undetermined	Undetermined	Undetermined	Undetermined	Undetermined	Undetermined	Undetermined	Undetermined	Undetermined	Undetermined	Undetermined	Undetermined	Undetermined	Undetermined	Undetermined	Undetermined	Undetermined	Undetermined	Undetermined	Undetermined	Undetermined	Undetermined	Undetermined	Undetermined
J2	1141	hsa-miR-451	22.7483	Undetermined	20.324	20.8745	Undetermined	Undetermined	Undetermined	22.3403	19.367	Undetermined	Undetermined	19.9434	Undetermined	Undetermined	Undetermined	Undetermined	Undetermined	Undetermined	Undetermined	Undetermined	Undetermined	Undetermined	Undetermined	Undetermined
J20	1630	hsa-miR-491	Undetermined	30.2797	Undetermined	Undetermined	Undetermined	Undetermined	Undetermined	29.0215	29.547	Undetermined	Undetermined	Undetermined	Undetermined	Undetermined	Undetermined	Undetermined	Undetermined	Undetermined	Undetermined	Undetermined	Undetermined	Undetermined	Undetermined	Undetermined
J21	2364	hsa-miR-493	Undetermined	Undetermined	Undetermined	Undetermined	Undetermined	Undetermined	Undetermined	Undetermined	Undetermined	Undetermined	Undetermined	Undetermined	Undetermined	Undetermined	Undetermined	Undetermined	Undetermined	Undetermined	Undetermined	Undetermined	Undetermined	Undetermined	Undetermined	Undetermined
J22	2365	hsa-miR-494	Undetermined	Undetermined	Undetermined	Undetermined	Undetermined	Undetermined	Undetermined	30.6531	Undetermined	Undetermined	Undetermined	Undetermined	Undetermined	Undetermined	Undetermined	Undetermined	Undetermined	Undetermined	Undetermined	Undetermined	Undetermined	Undetermined	Undetermined	Undetermined
J23	1663	hsa-miR-495	Undetermined	Undetermined	Undetermined	Undetermined	Undetermined	Undetermined	Undetermined	32.3278	Undetermined	Undetermined	Undetermined	Undetermined	Undetermined	Undetermined	Undetermined	Undetermined	Undetermined	Undetermined	Undetermined	Undetermined	Undetermined	Undetermined	Undetermined	Undetermined
J24	1953	hsa-miR-496	Undetermined	Undetermined	Undetermined	Undetermined	Undetermined	Undetermined	Undetermined	Undetermined	Undetermined	Undetermined	Undetermined	Undetermined	Undetermined	Undetermined	Undetermined	Undetermined	Undetermined	Undetermined	Undetermined	Undetermined	Undetermined	Undetermined	Undetermined	Undetermined
J3	2329	hsa-miR-452	35.0994	32.9733	32.9768	31.4002	Undetermined	Undetermined	Undetermined	34.1185	32.1426	Undetermined	Undetermined	32.9366	Undetermined	Undetermined	Undetermined	Undetermined	Undetermined	Undetermined	Undetermined	Undetermined	Undetermined	Undetermined	Undetermined	Undetermined
J4	2318	hsa-miR-453	Undetermined	Undetermined	Undetermined	Undetermined	Undetermined	Undetermined	Undetermined	Undetermined	Undetermined	Undetermined	Undetermined	Undetermined	Undetermined	Undetermined	Undetermined	Undetermined	Undetermined	Undetermined	Undetermined	Undetermined	Undetermined	Undetermined	Undetermined	Undetermined
J5	2323	hsa-miR-454	27.3962	27.9721	26.7693	27.7476	Undetermined	Undetermined	Undetermined	27.082	26.1144	Undetermined	Undetermined	Undetermined	Undetermined	Undetermined	Undetermined	Undetermined	Undetermined	Undetermined	Undetermined	Undetermined	Undetermined	Undetermined	Undetermined	Undetermined
J6	2244	hsa-miR-455-3p	Undetermined	Undetermined	Undetermined	Undetermined	Undetermined	Undetermined	Undetermined	Undetermined	Undetermined	Undetermined	Undetermined	Undetermined	Undetermined	Undetermined	Undetermined	Undetermined	Undetermined	Undetermined	Undetermined	Undetermined	Undetermined	Undetermined	Undetermined	Undetermined
J7	1280	hsa-miR-455	Undetermined	Undetermined	35.3265	Undetermined	Undetermined	Undetermined	Undetermined	Undetermined	35.5478	Undetermined	Undetermined	Undetermined	Undetermined	Undetermined	Undetermined	Undetermined	Undetermined	Undetermined	Undetermined	Undetermined	Undetermined	Undetermined	Undetermined	Undetermined
J8	2338	hsa-miR-483-5p	28.7649	29.2224	27.303	29.4345	Undetermined	Undetermined	Undetermined	25.645	28.0589	Undetermined	Undetermined	Undetermined	Undetermined	Undetermined	Undetermined	Undetermined	Undetermined	Undetermined	Undetermined	Undetermined	Undetermined	Undetermined	Undetermined	Undetermined
J9	1821	hsa-miR-484	22.0373	21.3068	21.1454	22.0549	Undetermined	Undetermined	Undetermined	20.1164	20.0252	Undetermined	Undetermined	Undetermined	Undetermined	Undetermined	Undetermined	Undetermined	Undetermined	Undetermined	Undetermined	Undetermined	Undetermined	Undetermined	Undetermined	Undetermined
K1	2427	hsa-miR-499-3p	Undetermined	Undetermined	Undetermined	Undetermined	Undetermined	Undetermined	Undetermined	Undetermined	Undetermined	Undetermined	Undetermined	Undetermined	Undetermined	33.7589	Undetermined	Undetermined	Undetermined	Undetermined	Undetermined	Undetermined	Undetermined	Undetermined	Undetermined	Undetermined
K10	2089	hsa-miR-505	Undetermined	33.0803	Undetermined	Undetermined	32.2096	Undetermined	Undetermined	Undetermined	32.8447	31.2147	Undetermined	32.0267	27.1437	26.0628	27.6633	26.8304	26.2075	26.289	26.7499	26.2118	27.8787	27.2852	26.4845	25.9074
K11	1051	hsa-miR-507	Undetermined	Undetermined	Undetermined	Undetermined	Undetermined	Undetermined	Undetermined	Undetermined	Undetermined	Undetermined	Undetermined	Undetermined	Undetermined	Undetermined	Undetermined	Undetermined	Undetermined	Undetermined	Undetermined	30.756	Undetermined	Undetermined	Undetermined	35.1618
K12	1052	hsa-miR-508	Undetermined	Undetermined	Undetermined	Undetermined	Undetermined	Undetermined	Undetermined	Undetermined	Undetermined	Undetermined	Undetermined	Undetermined	35.0065	31.7853	33.7038	32.0787	31.2527	31.7257	24.9564	20.5468	26.0545	24.9069	24.6478	22.7889
K13	2092	hsa-miR-508-5p	Undetermined	Undetermined	Undetermined	Undetermined	Undetermined	Undetermined	Undetermined	Undetermined	Undetermined	Undetermined	Undetermined	Undetermined	Undetermined	Undetermined	Undetermined	Undetermined	Undetermined	Undetermined	Undetermined	26.229	Undetermined	Undetermined	Undetermined	31.7261
K14	2235	hsa-miR-509-5p	Undetermined	Undetermined	Undetermined	Undetermined	Undetermined	Undetermined	Undetermined	Undetermined	Undetermined	Undetermined	Undetermined	Undetermined	Undetermined	Undetermined	Undetermined	Undetermined	33.6344	Undetermined	25.3977	21.1648	27.2262	25.2625	26.452	23.7318
K15	2241	hsa-miR-510	Undetermined	Undetermined	Undetermined	Undetermined	Undetermined	Undetermined	Undetermined	Undetermined	Undetermined	Undetermined	Undetermined	Undetermined	Undetermined	Undetermined	Undetermined	Undetermined	Undetermined	Undetermined	30.2853	25.3629	31.6138	29.826	28.5243	27.3921
K16	1823	hsa-miR-512-3p	Undetermined	Undetermined	36.3383	Undetermined	33.1713	Undetermined	Undetermined	Undetermined	Undetermined	Undetermined	Undetermined	Undetermined	Undetermined	32.1586	Undetermined	33.2066	Undetermined	Undetermined	36.6429	34.2188	Undetermined	31.1963	Undetermined	Undetermined
K17	1145	hsa-miR-512-5p	Undetermined	Undetermined	Undetermined	Undetermined	Undetermined	Undetermined	Undetermined	Undetermined	Undetermined	Undetermined	Undetermined	Undetermined	Undetermined	Undetermined	Undetermined	Undetermined	Undetermined	Undetermined	Undetermined	Undetermined	Undetermined	Undetermined	Undetermined	Undetermined
K18	2090	hsa-miR-513-5p	Undetermined	Undetermined	Undetermined	Undetermined	Undetermined	Undetermined	Undetermined	Undetermined	Undetermined	Undetermined	Undetermined	Undetermined	Undetermined	Undetermined	Undetermined	Undetermined	Undetermined	Undetermined	33.453	28.9477	Undetermined	32.0844	36.9575	32.9321
K19	2369	hsa-miR-515-3p	Undetermined	Undetermined	Undetermined	Undetermined	Undetermined	Undetermined	Undetermined	Undetermined	Undetermined	Undetermined	Undetermined	Undetermined	Undetermined	Undetermined	Undetermined	Undetermined	Undetermined	Undetermined	Undetermined	Undetermined	Undetermined	35.2745	Undetermined	Undetermined
K2	1352	hsa-miR-499	Undetermined	Undetermined	Undetermined	Undetermined	Undetermined	Undetermined	Undetermined	Undetermined	Undetermined	Undetermined	Undetermined	Undetermined	32.0787	32.0454	Undetermined	33.1152	32.3	32.616	31.4668	Undetermined	33.618	31.9802	33.0238	30.0474
K20	1112	hsa-miR-515-5p	Undetermined	Undetermined	Undetermined	Undetermined	Undetermined	Undetermined	Undetermined	Undetermined	Undetermined	Undetermined	Undetermined	Undetermined	Undetermined	Undetermined	Undetermined	Undetermined	Undetermined	Undetermined	Undetermined	Undetermined	Undetermined	Undetermined	Undetermined	Undetermined
K21	2416	hsa-miR-516a-5p	Undetermined	Undetermined	Undetermined	Undetermined	Undetermined	Undetermined	Undetermined	Undetermined	Undetermined	Undetermined	Undetermined	Undetermined	Undetermined	Undetermined	Undetermined	Undetermined	Undetermined	Undetermined	Undetermined	Undetermined	Undetermined	Undetermined	Undetermined	Undetermined
K22	1150	hsa-miR-516b	Undetermined	Undetermined	Undetermined	Undetermined	Undetermined	Undetermined	Undetermined	Undetermined	Undetermined	Undetermined	Undetermined	Undetermined	Undetermined	Undetermined	Undetermined	Undetermined	Undetermined	Undetermined	Undetermined	Undetermined	Undetermined	Undetermined	Undetermined	Undetermined
K23	2402	hsa-miR-517a	38.3617	Undetermined	Undetermined	Undetermined	Undetermined	Undetermined	35.5714	Undetermined	Undetermined	Undetermined	Undetermined	34.062	35.0645	32.7842	35.292	35.5842	34.8387	Undetermined	Undetermined	33.6437	Undetermined	31.5551	34.4182	36.0145
K24	1153	hsa-miR-517c	39.7459	Undetermined	Undetermined	Undetermined	Undetermined	Undetermined	36.8035	Undetermined	Undetermined	Undetermined	36.1254	Undetermined	Undetermined	34.8817	33.4536	35.2927	Undetermined	33.8203	Undetermined	32.2574	Undetermined	32.5296	Undetermined	33.6753
K3	2428	hsa-miR-500	35.4479	32.0962	33.8513	Undetermined	33.5696	32.0917	30.175	32.7216	32.8695	31.1207	32.8006	34.7726	26.2069	25.2492	25.2445	25.432	24.2619	24.401	24.4386	24.0628	24.4558	23.3271	23.337	22.5951
K4	2435	hsa-miR-501-3p	Undetermined	Undetermined	Undetermined	Undetermined	Undetermined	Undetermined	Undetermined	Undetermined	Undetermined	Undetermined	Undetermined	Undetermined	Undetermined	Undetermined	Undetermined	Undetermined	29.4906	30.6669	Undetermined	28.1036	30.762	28.8087	27.3294	27.6167
K5	1047	hsa-miR-501	Undetermined	Undetermined	Undetermined	Undetermined	Undetermined	Undetermined	30.1027	Undetermined	Undetermined	Undetermined	Undetermined	Undetermined	29.7034	27.534	27.9015	27.786	26.2445	26.6209	26.4154	24.5088	25.3469	25.1081	24.7188	24.2553
K6	2083	hsa-miR-502-3p	35.2155	32.0762	32.7279	32.9629	32.7542	31.8909	31.5077	34.5317	30.786	31.1391	32.4236	30.7992	27.9433	26.0925	27.2396	26.4747	25.2204	26.1047	25.3513	25.3573	26.2482	24.9618	24.4292	23.9276
K7	1109	hsa-miR-502	33.8368	33.8081	Undetermined	35.2117	Undetermined	38.1967	31.7496	Undetermined	Undetermined	35.6363	34.1108	35.0218	27.7396	26.68	27.3889	27.0431	26.2158	26.7985	25.8069	25.7872	26.3896	25.3011	24.9898	24.1022
K8	1048	hsa-miR-503	Undetermined	35.4535	Undetermined	Undetermined	Undetermined	Undetermined	Undetermined	Undetermined	33.8093	37.2472	Undetermined	Undetermined	29.3899	28.3511	28.1522	32.0763	29.6502	30.3993	29.6539	29.2114	29.9155	30.1531	28.845	27.5123
K9	2084	hsa-miR-504	Undetermined	Undetermined	Undetermined	Undetermined	Undetermined	Undetermined	Undetermined	Undetermined	Undetermined	Undetermined	Undetermined	Undetermined	Undetermined	30.1309	31.1552	28.8783	25.8413	28.3462	30.0429	27.1822	31.4844	28.8168	26.2783	26.131
L1	2397	hsa-miR-518a-3p	Undetermined	Undetermined	Undetermined	Undetermined	Undetermined	Undetermined	Undetermined	Undetermined	Undetermined	Undetermined	Undetermined	Undetermined	Undetermined	Undetermined	Undetermined	39.7306	Undetermined	Undetermined	Undetermined	Undetermined	Undetermined	34.6761	Undetermined	Undetermined
L10	2403	hsa-miR-519d	35.3715	Undetermined	Undetermined	Undetermined	35.5599	Undetermined	Undetermined	Undetermined	Undetermined	Undetermined	Undetermined	33.6723	33.964	34.7287	33.5553	34.006	Undetermined	Undetermined	34.6773	Undetermined	Undetermined	31.1879	Undetermined	35.5524
L11	2370	hsa-miR-519e	Undetermined	Undetermined	Undetermined	Undetermined	Undetermined	Undetermined	Undetermined	Undetermined	Undetermined	Undetermined	Undetermined	Undetermined	Undetermined	Undetermined	Undetermined	Undetermined	Undetermined	Undetermined	Undetermined	Undetermined	Undetermined	37.4417	Undetermined	Undetermined
L12	1167	hsa-miR-520a	Undetermined	Undetermined	Undetermined	Undetermined	Undetermined	Undetermined	Undetermined	Undetermined	Undetermined	Undetermined	Undetermined	Undetermined	Undetermined	Undetermined	Undetermined	Undetermined	Undetermined	Undetermined	Undetermined	Undetermined	Undetermined	Undetermined	Undetermined	Undetermined
L13	1168	hsa-miR-520a#	Undetermined	Undetermined	Undetermined	Undetermined	Undetermined	Undetermined	Undetermined	Undetermined	Undetermined	Undetermined	Undetermined	Undetermined	Undetermined	Undetermined	Undetermined	Undetermined	Undetermined	Undetermined	Undetermined	Undetermined	Undetermined	Undetermined	Undetermined	Undetermined
L14	2393	hsa-miR-520d-5p	Undetermined	Undetermined	Undetermined	Undetermined	Undetermined	Undetermined	Undetermined	Undetermined	Undetermined	Undetermined	Undetermined	Undetermined	Undetermined	Undetermined	Undetermined	Undetermined	Undetermined	Undetermined	Undetermined	Undetermined	Undetermined	Undetermined	Undetermined	Undetermined
L15	1121	hsa-miR-520g	Undetermined	Undetermined	Undetermined	Undetermined	Undetermined	Undetermined	Undetermined	Undetermined	Undetermined	Undetermined	Undetermined	Undetermined	Undetermined	Undetermined	Undetermined	Undetermined	Undetermined	Undetermined	Undetermined	Undetermined	Undetermined	Undetermined	Undetermined	Undetermined
L16	1122	hsa-miR-521	Undetermined	Undetermined	Undetermined	Undetermined	Undetermined	Undetermined	Undetermined	Undetermined	Undetermined	Undetermined	Undetermined	Undetermined	Undetermined	Undetermined	Undetermined	Undetermined	Undetermined	Undetermined	Undetermined	Undetermined	Undetermined	Undetermined	Undetermined	Undetermined
L17	2413	hsa-miR-522	Undetermined	Undetermined	Undetermined	Undetermined	Undetermined	Undetermined	Undetermined	Undetermined	Undetermined	Undetermined	Undetermined	Undetermined	Undetermined	Undetermined	Undetermined	Undetermined	Undetermined	Undetermined	37.2199	Undetermined	33.4565	Undetermined	Undetermined	Undetermined
L18	2386	hsa-miR-523	Undetermined	Undetermined	Undetermined	Undetermined	Undetermined	Undetermined	Undetermined	Undetermined	Undetermined	Undetermined	37.6442	35.5439	34.024	34.1222	Undetermined	Undetermined	Undetermined	Undetermined	Undetermined	Undetermined	Undetermined	Undetermined	34.1332	38.0728
L19	1982	hsa-miR-524-5p	Undetermined	Undetermined	Undetermined	Undetermined	Undetermined	Undetermined	Undetermined	Undetermined	Undetermined	Undetermined	Undetermined	Undetermined	Undetermined	Undetermined	Undetermined	Undetermined	Undetermined	Undetermined	Undetermined	Undetermined	Undetermined	Undetermined	Undetermined	Undetermined
L2	2396	hsa-miR-518a-5p	Undetermined	Undetermined	Undetermined	Undetermined	Undetermined	Undetermined	Undetermined	Undetermined	Undetermined	Undetermined	Undetermined	Undetermined	Undetermined	Undetermined	Undetermined	Undetermined	Undetermined	Undetermined	Undetermined	Undetermined	Undetermined	Undetermined	Undetermined	Undetermined
L20	2385	hsa-miR-525-3p	Undetermined	Undetermined	Undetermined	Undetermined	Undetermined	Undetermined	Undetermined	Undetermined	Undetermined	Undetermined	Undetermined	Undetermined	Undetermined	Undetermined	Undetermined	Undetermined	Undetermined	Undetermined	Undetermined	Undetermined	Undetermined	Undetermined	Undetermined	Undetermined
L21	1174	hsa-miR-525	Undetermined	Undetermined	Undetermined	Undetermined	Undetermined	Undetermined	Undetermined	Undetermined	Undetermined	Undetermined	Undetermined	Undetermined	Undetermined	Undetermined	Undetermined	Undetermined	Undetermined	Undetermined	Undetermined	Undetermined	Undetermined	Undetermined	Undetermined	Undetermined
L22	2382	hsa-miR-526b	Undetermined	Undetermined	Undetermined	Undetermined	Undetermined	Undetermined	Undetermined	Undetermined	Undetermined	Undetermined	Undetermined	Undetermined	Undetermined	Undetermined	Undetermined	Undetermined	Undetermined	Undetermined	Undetermined	Undetermined	Undetermined	Undetermined	Undetermined	Undetermined
L23	2355	hsa-miR-532-3p	30.597	29.276	29.0176	29.95	28.2291	29.537	26.6717	29.5654	27.9262	28.3104	29.6531	27.0632	23.5173	22.0286	22.2958	22.2035	20.7754	20.929	20.5701	19.9883	21.2218	19.9569	Undetermined	19.03
L24	1518	hsa-miR-532	28.2107	26.7308	27.2654	27.956	26.1343	27.7429	24.9937	27.2543	25.9915	25.0712	27.0724	24.9828	22.3208	21.0603	21.5583	21.4207	20.3846	20.4024	19.6363	19.5861	20.0198	19.0425	18.85	18.1324
L3	1156	hsa-miR-518b	Undetermined	Undetermined	36.9485	Undetermined	Undetermined	Undetermined	Undetermined	33.9924	36.9293	36.8229	Undetermined	36.6888	33.7874	32.8435	32.9466	Undetermined	Undetermined	Undetermined	32.0525	31.4201	34.4741	32.1493	31.3307	31.8846
L4	2401	hsa-miR-518c	Undetermined	Undetermined	Undetermined	Undetermined	Undetermined	Undetermined	Undetermined	Undetermined	Undetermined	Undetermined	Undetermined	Undetermined	Undetermined	Undetermined	Undetermined	Undetermined	Undetermined	Undetermined	Undetermined	Undetermined	Undetermined	Undetermined	Undetermined	Undetermined
L5	1159	hsa-miR-518d	Undetermined	Undetermined	Undetermined	36.3544	Undetermined	Undetermined	34.9428	34.5906	Undetermined	Undetermined	Undetermined	Undetermined	Undetermined	Undetermined	Undetermined	Undetermined	Undetermined	Undetermined	34.3298	Undetermined	Undetermined	34.1955	Undetermined	Undetermined
L6	2389	hsa-miR-518d-5p	Undetermined	Undetermined	Undetermined	Undetermined	Undetermined	Undetermined	Undetermined	Undetermined	Undetermined	Undetermined	Undetermined	Undetermined	Undetermined	Undetermined	Undetermined	Undetermined	Undetermined	Undetermined	Undetermined	Undetermined	Undetermined	Undetermined	Undetermined	Undetermined
L7	2395	hsa-miR-518e	Undetermined	Undetermined	Undetermined	Undetermined	31.6384	Undetermined	Undetermined	Undetermined	Undetermined	Undetermined	34.5954	Undetermined	35.3876	Undetermined	Undetermined	Undetermined	Undetermined	Undetermined	34.2545	33.5387	Undetermined	Undetermined	Undetermined	35.5363
L8	2388	hsa-miR-518f	Undetermined	Undetermined	34.9504	Undetermined	Undetermined	Undetermined	Undetermined	Undetermined	35.5878	Undetermined	Undetermined	Undetermined	33.9946	31.9418	37.6476	Undetermined	Undetermined	Undetermined	32.1082	Undetermined	Undetermined	34.6576	33.7359	32.5142
L9	2415	hsa-miR-519a	Undetermined	Undetermined	35.5612	Undetermined	Undetermined	Undetermined	35.4621	Undetermined	Undetermined	37.1645	Undetermined	Undetermined	34.9765	34.0351	36.3526	35.2003	Undetermined	35.6033	Undetermined	33.659	33.9532	32.9649	Undetermined	33.2199
M1	1286	hsa-miR-539	29.3988	29.0933	Undetermined	29.7342	31.0351	31.7607	27.2677	30.9849	30.8001	29.6845	31.9391	29.7895	27.6382	23.4572	28.6692	27.1294	26.29	28.8117	23.1134	22.9387	27.9266	25.929	25.871	25.8178
M10	2408	hsa-miR-548b-5p	Undetermined	Undetermined	Undetermined	Undetermined	Undetermined	35.7971	Undetermined	33.1182	Undetermined	Undetermined	36.0234	Undetermined	32.0559	30.4451	30.8709	33.9367	30.8057	31.7881	29.762	32.6959	28.3483	29.849	28.2461	29.7082
M11	1590	hsa-miR-548c	35.3191	Undetermined	Undetermined	Undetermined	35.3687	35.6362	Undetermined	32.2431	33.2711	36.392	33.4786	34.2464	36.367	33.9888	38.3084	33.7605	34.8452	Undetermined	Undetermined	37.0862	34.8931	Undetermined	Undetermined	34.9198
M12	2429	hsa-miR-548c-5p	Undetermined	34.6262	Undetermined	Undetermined	32.9838	38.1504	Undetermined	Undetermined	32.4651	33.9684	35.4591	32.951	33.0215	31.4453	31.7507	33.711	33.6462	32.1582	30.7352	32.9512	29.0933	30.2548	30.7175	31.1839
M13	1605	hsa-miR-548d	Undetermined	Undetermined	35.1654	Undetermined	Undetermined	Undetermined	Undetermined	Undetermined	34.3063	Undetermined	34.307	35.832	32.9196	34.0845	33.0556	Undetermined	36.4747	33.5578	Undetermined	Undetermined	Undetermined	Undetermined	Undetermined	36.4966
M14	2237	hsa-miR-548d-5p	Undetermined	Undetermined	Undetermined	Undetermined	37.4614	Undetermined	Undetermined	Undetermined	34.2243	Undetermined	36.3376	36.9545	32.0258	30.584	31.8119	34.8823	31.5322	31.1603	30.7986	32.6927	28.9091	29.4608	29.2194	30.5696
M15	1535	hsa-miR-551b	Undetermined	Undetermined	Undetermined	Undetermined	Undetermined	Undetermined	32.9979	Undetermined	33.4547	33.9468	34.7359	34.2922	34.9402	30.5637	32.1006	32.9732	33.2642	30.7491	29.2957	31.719	30.6477	30.6741	31.8828	28.3637
M16	2345	hsa-miR-556-3p	Undetermined	Undetermined	Undetermined	Undetermined	Undetermined	Undetermined	Undetermined	Undetermined	Undetermined	Undetermined	Undetermined	Undetermined	Undetermined	Undetermined	Undetermined	Undetermined	Undetermined	Undetermined	37.0233	Undetermined	Undetermined	Undetermined	Undetermined	Undetermined
M17	2344	hsa-miR-556-5p	Undetermined	Undetermined	Undetermined	Undetermined	Undetermined	Undetermined	Undetermined	Undetermined	Undetermined	Undetermined	Undetermined	Undetermined	Undetermined	Undetermined	Undetermined	Undetermined	Undetermined	Undetermined	Undetermined	Undetermined	Undetermined	Undetermined	Undetermined	Undetermined
M18	1528	hsa-miR-561	Undetermined	Undetermined	Undetermined	Undetermined	Undetermined	Undetermined	Undetermined	Undetermined	Undetermined	Undetermined	Undetermined	Undetermined	Undetermined	Undetermined	39.2489	Undetermined	Undetermined	Undetermined	Undetermined	Undetermined	36.4438	36.6725	Undetermined	Undetermined
M19	2347	hsa-miR-570	Undetermined	Undetermined	Undetermined	Undetermined	35.1082	36.3753	Undetermined	Undetermined	Undetermined	36.4299	Undetermined	Undetermined	31.6484	33.5152	34.0764	32.1302	33.0555	31.7877	31.6153	33.6859	33.1308	34.5662	34.1926	31.7458
M2	2201	hsa-miR-541	Undetermined	Undetermined	Undetermined	Undetermined	Undetermined	Undetermined	Undetermined	Undetermined	Undetermined	Undetermined	Undetermined	Undetermined	Undetermined	Undetermined	Undetermined	Undetermined	Undetermined	Undetermined	Undetermined	Undetermined	Undetermined	Undetermined	Undetermined	Undetermined
M20	2349	hsa-miR-574-3p	32.9425	31.5773	31.1312	31.8443	30.2096	33.3214	31.5654	33.5573	30.5773	31.0568	31.8478	30.2793	26.7806	24.8789	26.0849	25.7298	24.8971	24.7144	25.9885	24.5404	27.9234	26.1923	24.2502	24.5697
M21	2351	hsa-miR-576-3p	Undetermined	32.5467	32.0708	31.0998	31.4124	32.7238	30.3593	30.7527	29.7877	31.1461	31.7928	29.3938	29.0977	27.5293	29.0187	28.9775	27.7609	28.5229	28.6166	28.7899	28.9899	28.5221	28.8103	27.5252
M22	2350	hsa-miR-576-5p	Undetermined	Undetermined	Undetermined	Undetermined	Undetermined	Undetermined	36.7603	Undetermined	Undetermined	Undetermined	Undetermined	Undetermined	Undetermined	Undetermined	Undetermined	Undetermined	Undetermined	Undetermined	Undetermined	Undetermined	Undetermined	Undetermined	Undetermined	Undetermined
M23	2398	hsa-miR-579	34.0526	31.8011	30.4082	31.759	31.2694	32.3463	30.83	Undetermined	29.9427	30.3259	31.2096	29.5084	28.9816	27.4681	29.0337	28.7353	28.61	28.4709	28.7696	30.336	30.9016	28.8573	29.5971	28.3759
M24	2399	hsa-miR-582-3p	Undetermined	34.734	Undetermined	Undetermined	34.8998	Undetermined	32.084	Undetermined	Undetermined	Undetermined	Undetermined	33.6266	33.0781	31.7076	34.5804	Undetermined	32.9035	34.1907	32.6625	35.7966	35.0521	34.3062	33.8693	32.4119
M3	1284	hsa-miR-542-3p	Undetermined	35.4385	33.0892	36.0509	Undetermined	35.4464	Undetermined	33.0833	33.6925	33.8541	Undetermined	31.2338	27.7892	27.2104	25.8379	29.2654	28.5174	28.086	27.1367	28.0855	28.6144	27.1853	28.315	25.7526
M4	2240	hsa-miR-542-5p	Undetermined	Undetermined	Undetermined	37.3017	36.0285	37.9292	34.6356	Undetermined	37.2669	Undetermined	37.7588	32.6742	29.2414	28.1349	26.3459	29.6166	28.7019	28.7923	27.2775	27.777	28.4771	27.8152	26.4181	26.0109
M5	2265	hsa-miR-544	Undetermined	Undetermined	Undetermined	Undetermined	Undetermined	Undetermined	Undetermined	Undetermined	Undetermined	Undetermined	Undetermined	Undetermined	Undetermined	Undetermined	Undetermined	Undetermined	Undetermined	Undetermined	Undetermined	34.3305	Undetermined	Undetermined	Undetermined	35.2317
M6	2267	hsa-miR-545	Undetermined	32.5779	31.5013	30.8763	31.1014	Undetermined	29.6594	34.8965	29.9784	30.0579	32.4103	30.377	29.4297	28.3647	29.7013	29.7611	30.5905	28.774	29.538	29.1401	31.765	30.0247	32.1944	28.9022
M7	1538	hsa-miR-548a	35.19	34.9041	35.5161	37.3553	35.3701	Undetermined	Undetermined	33.3468	33.3328	35.1396	36.6508	38.9149	35.1564	32.8716	34.2586	34.4713	34.2974	35.2257	33.3656	34.7542	34.2795	35.7034	Undetermined	34.5378
M8	2412	hsa-miR-548a-5p	Undetermined	Undetermined	Undetermined	Undetermined	Undetermined	Undetermined	Undetermined	Undetermined	38.9306	Undetermined	Undetermined	Undetermined	Undetermined	Undetermined	Undetermined	34.5992	Undetermined	Undetermined	Undetermined	Undetermined	38.3893	Undetermined	Undetermined	Undetermined
M9	1541	hsa-miR-548b	Undetermined	Undetermined	Undetermined	Undetermined	Undetermined	Undetermined	Undetermined	Undetermined	Undetermined	Undetermined	Undetermined	Undetermined	Undetermined	Undetermined	Undetermined	Undetermined	Undetermined	Undetermined	Undetermined	Undetermined	Undetermined	Undetermined	Undetermined	Undetermined
N1	1983	hsa-miR-582-5p	Undetermined	Undetermined	Undetermined	Undetermined	Undetermined	Undetermined	Undetermined	Undetermined	Undetermined	Undetermined	Undetermined	Undetermined	Undetermined	30.2364	36.7493	34.8315	34.5422	36.6028	36.5369	36.6837	Undetermined	33.763	35.8178	33.2407
N10	2430	hsa-miR-624	Undetermined	Undetermined	Undetermined	Undetermined	Undetermined	Undetermined	Undetermined	Undetermined	Undetermined	Undetermined	Undetermined	Undetermined	Undetermined	Undetermined	Undetermined	Undetermined	Undetermined	Undetermined	Undetermined	Undetermined	Undetermined	Undetermined	Undetermined	Undetermined
N11	2431	hsa-miR-625	32.8842	32.3647	31.9343	31.6984	31.4164	33.4436	29.7473	32.3955	30.6994	31.4613	30.9289	29.6074	29.2705	26.6511	28.1042	28.5515	27.8658	27.77	29.0076	27.7981	29.8369	29.236	27.7779	27.6086
N12	1560	hsa-miR-627	Undetermined	33.4276	33.0568	Undetermined	34.2575	34.0633	31.4583	32.7707	34.0081	32.4635	33.6596	34.7639	32.8444	30.1704	31.6438	32.9664	31.9007	32.2893	32.3949	31.6274	34.5126	32.078	32.2915	32.2252
N13	2433	hsa-miR-628-5p	33.7875	33.3319	32.1994	31.724	32.4107	34.0463	29.5555	29.3999	30.4808	30.7794	31.8427	28.454	26.8094	25.2437	25.8455	26.0345	25.2351	25.4979	24.982	25.235	26.4364	25.2167	25.4589	23.8838
N14	2436	hsa-miR-629	32.7297	31.4115	33.01	31.1901	33.2197	36.6504	30.4671	31.6266	30.8685	31.0587	30.9582	29.6206	28.7939	27.3836	29.072	28.433	28.181	27.5813	30.0995	29.6569	31.1385	29.2753	28.9713	27.961
N15	2088	hsa-miR-636	Undetermined	32.549	32.1099	Undetermined	36.4968	33.9249	29.236	33.1214	31.5978	31.9062	32.9406	32.8644	29.8395	29.8182	30.9122	30.2034	30.64	30.984	29.9039	30.9849	33.0388	32.0478	30.3055	29.1992
N16	1592	hsa-miR-642	Undetermined	32.5876	33.1012	33.1904	30.4586	32.1946	31.3574	29.1721	32.0926	36.7642	32.0282	30.9274	27.3643	23.1573	26.2163	27.3956	26.3119	24.9138	28.0635	26.8952	29.249	27.2676	26.1121	25.7064
N17	1604	hsa-miR-651	Undetermined	Undetermined	Undetermined	Undetermined	35.6744	Undetermined	Undetermined	Undetermined	Undetermined	Undetermined	Undetermined	34.2551	35.0556	31.1985	32.6058	33.5384	31.7821	31.4078	34.1893	32.3079	32.9893	31.4475	34.5479	31.9432
N18	2352	hsa-miR-652	31.34	29.0179	29.1125	30.4299	29.2231	32.3148	26.9313	29.1651	27.4374	27.3478	29.9675	26.8946	25.1482	23.3258	25.1651	25.3071	24.0628	24.8797	23.0078	23.4771	24.3733	23.6449	22.8977	22.5843
N19	2292	hsa-miR-653	Undetermined	Undetermined	Undetermined	Undetermined	Undetermined	Undetermined	Undetermined	Undetermined	Undetermined	Undetermined	Undetermined	Undetermined	32.4808	33.3481	Undetermined	31.3551	29.3664	Undetermined	31.8714	Undetermined	32.6431	31.4845	31.6917	29.9897
N2	2409	hsa-miR-589	Undetermined	36.1844	34.2736	Undetermined	Undetermined	36.0698	34.0776	Undetermined	34.7018	Undetermined	Undetermined	33.5699	33.8209	31.0718	32.1343	33.2202	32.0389	31.9223	33.5497	32.1614	34.2787	32.2359	32.5282	31.3896
N20	2239	hsa-miR-654-3p	Undetermined	Undetermined	31.6081	Undetermined	Undetermined	Undetermined	32.4941	Undetermined	34.5089	33.5642	Undetermined	36.0048	33.4277	30.6811	34.2737	32.7162	30.9504	32.6947	28.8227	29.6273	31.9806	31.4557	30.0315	29.6923
N21	1611	hsa-miR-654	Undetermined	Undetermined	Undetermined	Undetermined	Undetermined	Undetermined	34.2416	Undetermined	Undetermined	Undetermined	Undetermined	Undetermined	Undetermined	Undetermined	Undetermined	Undetermined	Undetermined	Undetermined	29.9097	29.882	Undetermined	Undetermined	32.0817	Undetermined
N22	1612	hsa-miR-655	Undetermined	35.6691	32.8992	33.542	34.0877	38.7514	32.1362	37.0615	33.2286	34.3861	Undetermined	35.6099	30.318	26.8057	31.6132	30.1911	29.3665	31.9087	27.6981	28.1481	31.0822	29.4513	30.5398	28.617
N23	1515	hsa-miR-660	28.0475	26.0883	26.4393	26.9841	25.9311	27.2099	24.979	26.6972	25.7439	24.3766	26.6584	24.9665	22.118	20.8843	21.5624	21.7187	21.0367	20.5487	19.1113	19.811	20.1634	19.1652	20.1874	18.2616
N24	2322	hsa-miR-671-3p	33.6316	33.0258	31.0273	32.3653	30.567	34.4294	29.7826	30.0738	30.9865	29.6966	30.8016	29.6662	29.2683	26.1826	27.6679	27.7776	26.1178	26.3575	26.511	25.8955	28.0031	26.5397	25.2498	26.2514
N3	1984	hsa-miR-590-5p	27.7412	26.4108	26.019	26.756	25.8828	27.3525	24.4027	25.5446	24.9636	24.9286	25.8154	23.8766	23.7117	22.3441	23.9346	23.736	24.6869	22.8024	24.2035	24.5066	25.6105	24.0635	25.637	22.7767
N4	1551	hsa-miR-597	Undetermined	30.2628	31.2978	33.484	30.9691	31.399	34.4196	Undetermined	30.3597	31.9326	31.0411	29.5734	28.0264	27.54	27.9649	27.7335	28.2417	27.1703	28.5726	28.5467	28.4685	28.4229	28.6036	27.4764
N5	1988	hsa-miR-598	31.6516	30.0083	30.0605	30.0579	29.1924	32.1656	28.4477	30.3027	28.5115	28.6512	29.519	28.6141	26.2645	24.1033	Undetermined	24.3845	26.9586	23.7367	24.7791	24.0685	26.2738	24.9889	25.1133	23.2305
N6	1960	hsa-miR-615	Undetermined	Undetermined	Undetermined	Undetermined	Undetermined	Undetermined	Undetermined	Undetermined	Undetermined	Undetermined	Undetermined	Undetermined	32.3322	Undetermined	Undetermined	28.644	27.3997	31.288	Undetermined	28.6685	Undetermined	29.8443	27.0021	27.7643
N7	2353	hsa-miR-615-5p	Undetermined	Undetermined	Undetermined	Undetermined	Undetermined	Undetermined	Undetermined	Undetermined	Undetermined	Undetermined	Undetermined	Undetermined	Undetermined	Undetermined	Undetermined	Undetermined	Undetermined	Undetermined	Undetermined	Undetermined	Undetermined	Undetermined	Undetermined	Undetermined
N8	2414	hsa-miR-616	Undetermined	Undetermined	Undetermined	Undetermined	Undetermined	Undetermined	Undetermined	Undetermined	Undetermined	Undetermined	Undetermined	Undetermined	Undetermined	33.2804	Undetermined	Undetermined	32.8725	32.3613	Undetermined	32.395	32.7379	Undetermined	32.5646	33.9347
N9	1593	hsa-miR-618	33.2995	34.8996	33.8267	Undetermined	Undetermined	Undetermined	37.3683	32.0101	33.2448	Undetermined	39.4303	31.7938	27.8434	29.2832	29.2416	Undetermined	28.3845	28.168	27.8909	28.7193	29.646	28.2569	29.4734	28.3897
O1	2327	hsa-miR-672	Undetermined	Undetermined	Undetermined	Undetermined	Undetermined	Undetermined	Undetermined	Undetermined	Undetermined	Undetermined	Undetermined	Undetermined	Undetermined	33.7815	Undetermined	Undetermined	Undetermined	Undetermined	Undetermined	Undetermined	Undetermined	Undetermined	Undetermined	Undetermined
O10	2204	hsa-miR-875-3p	Undetermined	Undetermined	Undetermined	Undetermined	Undetermined	Undetermined	Undetermined	Undetermined	Undetermined	Undetermined	Undetermined	Undetermined	Undetermined	Undetermined	Undetermined	Undetermined	Undetermined	Undetermined	Undetermined	Undetermined	Undetermined	Undetermined	Undetermined	Undetermined
O11	2225	hsa-miR-876-3p	Undetermined	Undetermined	Undetermined	Undetermined	Undetermined	Undetermined	Undetermined	Undetermined	Undetermined	Undetermined	Undetermined	Undetermined	Undetermined	Undetermined	Undetermined	Undetermined	Undetermined	Undetermined	37.5505	32.1324	32.3096	Undetermined	31.5488	33.1949
O12	2205	hsa-miR-876-5p	Undetermined	Undetermined	Undetermined	Undetermined	Undetermined	Undetermined	Undetermined	Undetermined	Undetermined	Undetermined	Undetermined	Undetermined	Undetermined	Undetermined	Undetermined	35.1321	Undetermined	Undetermined	34.4698	36.3527	35.0651	34.2747	Undetermined	32.4786
O13	2372	hsa-miR-885-3p	Undetermined	Undetermined	Undetermined	Undetermined	Undetermined	Undetermined	Undetermined	Undetermined	Undetermined	Undetermined	Undetermined	Undetermined	Undetermined	Undetermined	Undetermined	Undetermined	Undetermined	Undetermined	Undetermined	Undetermined	Undetermined	Undetermined	Undetermined	Undetermined
O14	2296	hsa-miR-885-5p	28.2082	28.5238	27.9691	27.3203	23.8274	27.4175	27.1445	25.7104	27.4649	28.2288	27.2128	26.0902	24.94	22.8119	24.8942	22.0809	20.7691	20.2281	27.3432	26.2152	27.9591	25.1848	25.5731	24.435
O15	2194	hsa-miR-886-3p	34.3844	33.8939	36.481	Undetermined	34.0962	34.6828	34.2232	30.4263	33.6438	32.851	33.0636	33.2634	20.7633	20.801	19.8872	21.9205	19.9704	21.2765	20.3242	20.5557	22.032	21.9038	19.6056	20.7561
O16	2193	hsa-miR-886-5p	30.5457	30.3276	32.916	33.6589	31.7784	33.2232	28.5857	31.3457	30.1265	30.9537	31.2829	30.6762	20.3384	20.6353	20.0696	22.1492	20.0599	21.2542	19.9841	20.0932	21.6798	21.2278	19.1525	20.1437
O17	2374	hsa-miR-887	Undetermined	Undetermined	Undetermined	Undetermined	Undetermined	Undetermined	Undetermined	Undetermined	Undetermined	Undetermined	Undetermined	Undetermined	Undetermined	Undetermined	Undetermined	Undetermined	Undetermined	Undetermined	Undetermined	Undetermined	Undetermined	Undetermined	Undetermined	Undetermined
O18	2212	hsa-miR-888	Undetermined	Undetermined	Undetermined	Undetermined	Undetermined	Undetermined	Undetermined	Undetermined	34.0052	Undetermined	Undetermined	32.3401	Undetermined	25.8988	29.6445	Undetermined	Undetermined	Undetermined	26.5815	26.8776	26.498	26.1522	27.6423	26.1368
O19	2202	hsa-miR-889	33.8152	32.508	31.5163	33.5061	Undetermined	Undetermined	29.9166	Undetermined	30.9513	31.7842	36.1682	33.7682	30.2404	28.2825	Undetermined	31.0336	30.8702	Undetermined	27.3141	27.921	32.8582	29.9863	30.6886	29.3788
O2	2021	hsa-miR-674	Undetermined	Undetermined	Undetermined	Undetermined	Undetermined	Undetermined	Undetermined	Undetermined	Undetermined	Undetermined	Undetermined	Undetermined	Undetermined	Undetermined	Undetermined	Undetermined	Undetermined	Undetermined	Undetermined	Undetermined	Undetermined	Undetermined	Undetermined	Undetermined
O20	2209	hsa-miR-890	Undetermined	Undetermined	Undetermined	Undetermined	Undetermined	Undetermined	Undetermined	Undetermined	Undetermined	Undetermined	Undetermined	Undetermined	Undetermined	Undetermined	Undetermined	Undetermined	Undetermined	Undetermined	Undetermined	Undetermined	34.3861	Undetermined	35.2981	Undetermined
O21	2191	hsa-miR-891a	Undetermined	Undetermined	Undetermined	Undetermined	Undetermined	35.98	Undetermined	Undetermined	Undetermined	Undetermined	Undetermined	Undetermined	Undetermined	26.467	29.9478	Undetermined	33.7783	Undetermined	26.9856	26.7237	26.8317	26.2925	26.0299	27.1156
O22	2210	hsa-miR-891b	Undetermined	Undetermined	Undetermined	Undetermined	Undetermined	Undetermined	Undetermined	Undetermined	Undetermined	Undetermined	Undetermined	Undetermined	Undetermined	Undetermined	Undetermined	Undetermined	Undetermined	Undetermined	Undetermined	Undetermined	Undetermined	Undetermined	Undetermined	Undetermined
O23	2195	hsa-miR-892a	Undetermined	Undetermined	Undetermined	Undetermined	Undetermined	Undetermined	Undetermined	Undetermined	Undetermined	Undetermined	Undetermined	Undetermined	Undetermined	Undetermined	Undetermined	Undetermined	Undetermined	Undetermined	Undetermined	Undetermined	Undetermined	Undetermined	Undetermined	Undetermined
O24	469	hsa-miR-147	Undetermined	Undetermined	35.5769	Undetermined	Undetermined	Undetermined	Undetermined	Undetermined	Undetermined	Undetermined	Undetermined	Undetermined	35.1215	35.0045	Undetermined	35.366	Undetermined	35.7452	Undetermined	Undetermined	Undetermined	Undetermined	35.4121	Undetermined
O3	2341	hsa-miR-708	Undetermined	Undetermined	Undetermined	33.7613	Undetermined	35.5317	Undetermined	Undetermined	Undetermined	Undetermined	Undetermined	35.4731	24.545	21.9401	23.6858	25.3116	23.1607	22.423	23.4414	23.9328	24.739	23.389	22.8227	22.2226
O4	2324	hsa-miR-744	28.1745	27.7461	26.8047	28.2063	27.0097	30.4357	25.0829	26.877	25.9695	26.4125	26.9576	25.4213	23.8846	22.1515	22.825	23.0742	21.8662	22.1449	22.1035	21.8624	23.491	22.9365	20.2524	21.8855
O5	1990	hsa-miR-758	Undetermined	Undetermined	Undetermined	Undetermined	Undetermined	Undetermined	Undetermined	Undetermined	Undetermined	33.6577	Undetermined	Undetermined	Undetermined	30.8218	Undetermined	Undetermined	34.5704	Undetermined	29.6746	29.4562	32.81	31.5657	29.5875	31.098
O6	2354	hsa-miR-871	Undetermined	Undetermined	Undetermined	Undetermined	Undetermined	Undetermined	Undetermined	Undetermined	Undetermined	Undetermined	Undetermined	Undetermined	Undetermined	Undetermined	Undetermined	Undetermined	Undetermined	Undetermined	Undetermined	Undetermined	Undetermined	Undetermined	Undetermined	Undetermined
O7	2264	hsa-miR-872	Undetermined	Undetermined	Undetermined	Undetermined	Undetermined	Undetermined	Undetermined	Undetermined	Undetermined	Undetermined	Undetermined	Undetermined	Undetermined	Undetermined	Undetermined	Undetermined	Undetermined	Undetermined	Undetermined	Undetermined	Undetermined	Undetermined	Undetermined	Undetermined
O8	2356	hsa-miR-873	34.5632	Undetermined	Undetermined	Undetermined	Undetermined	Undetermined	Undetermined	Undetermined	Undetermined	Undetermined	Undetermined	Undetermined	Undetermined	Undetermined	Undetermined	37.1502	33.861	36.0091	31.1435	32.5044	31.4346	31.3268	32.5389	30.4561
O9	2268	hsa-miR-874	Undetermined	Undetermined	Undetermined	Undetermined	Undetermined	Undetermined	Undetermined	Undetermined	Undetermined	Undetermined	Undetermined	Undetermined	Undetermined	Undetermined	Undetermined	Undetermined	32.9675	31.0925	Undetermined	29.9793	29.4012	Undetermined	25.781	27.6659
P1	511	hsa-miR-208	Undetermined	Undetermined	Undetermined	Undetermined	Undetermined	Undetermined	Undetermined	Undetermined	Undetermined	Undetermined	Undetermined	Undetermined	36.8375	Undetermined	Undetermined	Undetermined	Undetermined	Undetermined	Undetermined	Undetermined	Undetermined	Undetermined	35.1619	Undetermined
P10	540	hsa-miR-325	Undetermined	Undetermined	Undetermined	Undetermined	Undetermined	Undetermined	Undetermined	Undetermined	Undetermined	Undetermined	Undetermined	Undetermined	Undetermined	Undetermined	Undetermined	Undetermined	Undetermined	Undetermined	Undetermined	Undetermined	Undetermined	Undetermined	Undetermined	Undetermined
P11	553	hsa-miR-346	Undetermined	Undetermined	Undetermined	Undetermined	Undetermined	Undetermined	Undetermined	Undetermined	32.8451	Undetermined	Undetermined	Undetermined	Undetermined	Undetermined	Undetermined	Undetermined	Undetermined	Undetermined	Undetermined	Undetermined	Undetermined	Undetermined	Undetermined	Undetermined
P12	2122	hsa-miR-376c	29.4677	27.9165	28.0171	28.5075	30.4591	31.7491	26.0204	29.4054	28.0734	28.2972	31.7566	28.3289	26.9569	22.925	27.4682	26.702	25.8561	28.9564	23.215	23.4933	26.9435	25.3668	25.6879	24.0677
P13	574	hsa-miR-384	Undetermined	Undetermined	Undetermined	Undetermined	Undetermined	Undetermined	Undetermined	Undetermined	Undetermined	Undetermined	Undetermined	Undetermined	Undetermined	Undetermined	38.5553	Undetermined	Undetermined	Undetermined	Undetermined	Undetermined	Undetermined	Undetermined	Undetermined	Undetermined
P14	1023	hsa-miR-412	Undetermined	Undetermined	Undetermined	Undetermined	Undetermined	Undetermined	Undetermined	Undetermined	Undetermined	Undetermined	Undetermined	Undetermined	Undetermined	Undetermined	Undetermined	Undetermined	Undetermined	Undetermined	Undetermined	Undetermined	Undetermined	Undetermined	Undetermined	Undetermined
P15	1029	hsa-miR-448	Undetermined	Undetermined	Undetermined	Undetermined	Undetermined	Undetermined	Undetermined	Undetermined	Undetermined	Undetermined	Undetermined	Undetermined	36.4201	Undetermined	Undetermined	Undetermined	Undetermined	Undetermined	Undetermined	Undetermined	Undetermined	Undetermined	Undetermined	Undetermined
P16	1039	hsa-miR-492	Undetermined	Undetermined	Undetermined	Undetermined	Undetermined	Undetermined	Undetermined	Undetermined	Undetermined	Undetermined	Undetermined	Undetermined	Undetermined	Undetermined	Undetermined	Undetermined	Undetermined	Undetermined	Undetermined	Undetermined	Undetermined	Undetermined	Undetermined	Undetermined
P17	1050	hsa-miR-506	Undetermined	Undetermined	Undetermined	Undetermined	Undetermined	Undetermined	Undetermined	Undetermined	Undetermined	Undetermined	Undetermined	Undetermined	Undetermined	Undetermined	36.278	Undetermined	34.38	Undetermined	27.3871	23.8165	29.7437	28.0706	27.9385	26.236
P18	2155	hsa-miR-509-3-5p	Undetermined	Undetermined	Undetermined	Undetermined	Undetermined	Undetermined	Undetermined	Undetermined	Undetermined	Undetermined	Undetermined	Undetermined	Undetermined	Undetermined	Undetermined	Undetermined	Undetermined	Undetermined	Undetermined	22.5873	Undetermined	32.587	28.859	29.2741
P19	1111	hsa-miR-511	34.5504	32.3542	32.5522	35.4025	32.4803	35.1826	Undetermined	Undetermined	32.9335	32.7213	32.8557	31.1875	28.6926	25.6461	27.5198	27.3351	26.1066	28.0371	27.4089	25.7202	29.1319	26.9888	26.2569	25.5344
P2	514	hsa-miR-211	Undetermined	Undetermined	34.2072	32.4908	31.6824	34.1847	Undetermined	30.8415	33.7846	Undetermined	Undetermined	30.8334	Undetermined	Undetermined	Undetermined	Undetermined	Undetermined	Undetermined	Undetermined	Undetermined	Undetermined	Undetermined	Undetermined	Undetermined
P20	1152	hsa-miR-517b	Undetermined	Undetermined	Undetermined	Undetermined	Undetermined	Undetermined	38.0168	Undetermined	Undetermined	Undetermined	Undetermined	Undetermined	Undetermined	36.6131	Undetermined	36.1285	Undetermined	Undetermined	Undetermined	Undetermined	Undetermined	34.388	Undetermined	Undetermined
P21	1163	hsa-miR-519c	Undetermined	Undetermined	Undetermined	Undetermined	Undetermined	Undetermined	37.9251	Undetermined	Undetermined	Undetermined	Undetermined	Undetermined	Undetermined	Undetermined	Undetermined	Undetermined	Undetermined	Undetermined	Undetermined	Undetermined	Undetermined	Undetermined	Undetermined	Undetermined
P22	1116	hsa-miR-520b	Undetermined	Undetermined	Undetermined	Undetermined	37.4731	Undetermined	Undetermined	Undetermined	Undetermined	Undetermined	39.0433	Undetermined	38.0997	38.2567	Undetermined	39.1679	Undetermined	37.5944	36.084	Undetermined	Undetermined	Undetermined	37.9158	Undetermined
P23	1119	hsa-miR-520e	Undetermined	Undetermined	Undetermined	Undetermined	Undetermined	Undetermined	Undetermined	Undetermined	35.3547	Undetermined	Undetermined	Undetermined	Undetermined	Undetermined	Undetermined	Undetermined	37.6894	36.0727	Undetermined	Undetermined	Undetermined	Undetermined	Undetermined	Undetermined
P24	1120	hsa-miR-520f	Undetermined	Undetermined	Undetermined	Undetermined	Undetermined	Undetermined	Undetermined	Undetermined	Undetermined	Undetermined	Undetermined	Undetermined	Undetermined	Undetermined	Undetermined	Undetermined	Undetermined	Undetermined	Undetermined	Undetermined	Undetermined	Undetermined	Undetermined	Undetermined
P3	515	hsa-miR-212	30.7163	31.0815	31.0971	31.0196	32.3911	32.4843	30.3888	31.0236	31.9237	31.3195	30.9173	28.2433	26.2804	22.5281	24.6173	24.991	23.4458	24.9393	24.048	23.941	26.4099	25.5077	23.9602	23.672
P4	2095	hsa-miR-219-1-3p	Undetermined	Undetermined	Undetermined	Undetermined	Undetermined	Undetermined	Undetermined	Undetermined	Undetermined	Undetermined	Undetermined	Undetermined	Undetermined	33.1655	33.7363	Undetermined	32.0588	Undetermined	31.2137	30.8071	Undetermined	31.4376	30.9149	31.0208
P5	2390	hsa-miR-219-2-3p	Undetermined	Undetermined	Undetermined	Undetermined	Undetermined	Undetermined	Undetermined	Undetermined	Undetermined	Undetermined	Undetermined	Undetermined	Undetermined	Undetermined	Undetermined	Undetermined	Undetermined	Undetermined	Undetermined	Undetermined	Undetermined	Undetermined	Undetermined	Undetermined
P6	523	hsa-miR-220	Undetermined	Undetermined	Undetermined	Undetermined	Undetermined	Undetermined	Undetermined	Undetermined	Undetermined	Undetermined	Undetermined	Undetermined	Undetermined	Undetermined	Undetermined	Undetermined	Undetermined	Undetermined	Undetermined	Undetermined	Undetermined	Undetermined	Undetermined	Undetermined
P7	2206	hsa-miR-220b	Undetermined	Undetermined	Undetermined	Undetermined	Undetermined	Undetermined	Undetermined	Undetermined	Undetermined	Undetermined	Undetermined	Undetermined	Undetermined	Undetermined	Undetermined	Undetermined	Undetermined	Undetermined	Undetermined	Undetermined	Undetermined	Undetermined	Undetermined	Undetermined
P8	2211	hsa-miR-220c	Undetermined	Undetermined	Undetermined	Undetermined	Undetermined	Undetermined	Undetermined	Undetermined	Undetermined	Undetermined	Undetermined	Undetermined	Undetermined	Undetermined	Undetermined	Undetermined	Undetermined	Undetermined	Undetermined	Undetermined	Undetermined	Undetermined	Undetermined	Undetermined
P9	2190	hsa-miR-298	Undetermined	Undetermined	Undetermined	Undetermined	Undetermined	Undetermined	Undetermined	Undetermined	Undetermined	Undetermined	Undetermined	36.4027	Undetermined	Undetermined	Undetermined	Undetermined	Undetermined	Undetermined	Undetermined	Undetermined	Undetermined	Undetermined	Undetermined	Undetermined

## Sheet: Results - Low Density Array B
Well	Assay ID	Gene	A_serum	B_serum	C_serum	D_serum	E_serum	F_serum	G_serum	H_serum	I_serum	J_serum	K_serum	L_serum	G_rcc	H_rcc	I_rcc	J_rcc	K_rcc	L_rcc	G_norm	H_norm	I_norm	J_norm	K_norm	L_norm
A1	268	hsa-miR-7	31.7872	31.6976	30.7786	31.8005	30.1902	30.9208	30.8066	30.9643	32.7504	29.9458	32.1364	31.3448	28.2945	26.1637	28.417	28.5465	28.4501	27.2615	29.6375	28.1257	30.0098	28.5234	28.4937	27.127
A10	483	hsa-miR-182#	Undetermined	Undetermined	Undetermined	Undetermined	Undetermined	Undetermined	Undetermined	Undetermined	Undetermined	Undetermined	Undetermined	Undetermined	Undetermined	Undetermined	Undetermined	Undetermined	Undetermined	Undetermined	Undetermined	Undetermined	Undetermined	Undetermined	Undetermined	Undetermined
A11	1973	U6 snRNA	Undetermined	27.1848	26.4294	25.6804	25.5197	25.9293	21.9105	21.7667	23.5912	25.7297	24.2487	21.27	15.3496	13.8394	14.9743	13.0009	13.3773	16.0653	14.3774	13.6434	15.8369	14.8799	14.1254	14.4494
A12	1973	U6 snRNA	26.2673	27.3871	26.7908	25.8252	25.6003	26.0882	22.1181	21.775	23.5605	25.7212	24.8119	20.9297	15.4377	13.8485	15.1453	14.4206	13.2547	16.0456	14.5872	13.7868	15.9906	14.7504	13.9943	14.4296
A13	510	hsa-miR-206	33.1564	32.9097	35.0047	33.951	33.1286	32.987	Undetermined	30.3072	32.336	32.4362	31.4081	31.4274	30.1598	29.3167	32.251	29.626	29.6542	31.1618	25.9325	25.8066	26.7029	24.7966	25.296	24.447
A14	516	hsa-miR-213	Undetermined	Undetermined	32.3837	36.1332	34.1372	34.0859	Undetermined	Undetermined	35.4637	Undetermined	Undetermined	32.3132	26.2089	24.2066	25.8315	Undetermined	25.7493	25.6799	26.8608	26.6013	27.5369	26.4536	26.3551	25.5202
A15	534	hsa-miR-302c#	Undetermined	Undetermined	Undetermined	Undetermined	Undetermined	Undetermined	Undetermined	Undetermined	Undetermined	Undetermined	Undetermined	Undetermined	Undetermined	Undetermined	Undetermined	36.6476	Undetermined	Undetermined	Undetermined	Undetermined	Undetermined	Undetermined	Undetermined	Undetermined
A16	535	hsa-miR-302d	Undetermined	Undetermined	Undetermined	Undetermined	Undetermined	Undetermined	Undetermined	Undetermined	Undetermined	Undetermined	Undetermined	33.1624	33.8679	Undetermined	34.6114	33.0127	33.398	Undetermined	32.0695	Undetermined	32.4909	30.3576	31.5315	30.5297
A17	567	hsa-miR-378	38.1786	Undetermined	36.3529	Undetermined	32.576	37.6197	37.7091	Undetermined	33.5311	34.7255	33.4177	32.3302	30.3679	29.4435	29.7307	29.7691	30.0483	29.8474	28.1033	27.943	29.2836	28.4731	26.93	28.1011
A18	570	hsa-miR-380-5p	Undetermined	Undetermined	Undetermined	Undetermined	Undetermined	Undetermined	31.2489	Undetermined	Undetermined	32.8069	Undetermined	Undetermined	Undetermined	31.2323	Undetermined	33.3419	31.4901	Undetermined	31.3127	32.3343	33.0793	34.7347	33.7919	32.9926
A19	2910	hsa-miR-1257	Undetermined	Undetermined	Undetermined	Undetermined	Undetermined	Undetermined	Undetermined	Undetermined	Undetermined	Undetermined	Undetermined	Undetermined	Undetermined	Undetermined	Undetermined	Undetermined	Undetermined	Undetermined	Undetermined	Undetermined	Undetermined	Undetermined	Undetermined	Undetermined
A2	2909	hsa-miR-548I	Undetermined	Undetermined	Undetermined	Undetermined	Undetermined	Undetermined	33.5249	Undetermined	Undetermined	Undetermined	Undetermined	36.1396	39.707	33.017	Undetermined	Undetermined	Undetermined	35.2157	34.8386	32.0384	Undetermined	32.8199	33.3421	32.8399
A20	1011	hsa-miR-200a#	Undetermined	Undetermined	Undetermined	Undetermined	Undetermined	Undetermined	Undetermined	Undetermined	Undetermined	Undetermined	Undetermined	Undetermined	28.5338	28.5565	27.6722	28.0535	27.3099	26.8936	25.8819	25.5971	27.6392	26.1963	26.022	24.9904
A21	1026	hsa-miR-432	Undetermined	29.2234	28.2536	28.6055	31.9616	31.4845	26.024	29.114	28.2457	31.5248	32.3742	29.9469	28.0123	25.5436	29.468	27.0208	27.3925	29.2261	25.0818	24.0024	30.6298	28.3627	27.0203	27.244
A22	1027	hsa-miR-432#	35.9908	Undetermined	Undetermined	Undetermined	Undetermined	Undetermined	Undetermined	Undetermined	Undetermined	Undetermined	Undetermined	Undetermined	Undetermined	Undetermined	Undetermined	Undetermined	33.373	Undetermined	Undetermined	Undetermined	Undetermined	Undetermined	Undetermined	Undetermined
A23	1043	hsa-miR-497	36.0378	Undetermined	35.6584	Undetermined	Undetermined	32.3488	33.773	Undetermined	31.7863	34.455	34.6095	Undetermined	23.211	22.0463	23.3547	22.8056	23.2733	23.4908	24.239	23.1162	25.473	23.9145	24.203	22.6435
A24	1046	hsa-miR-500	Undetermined	Undetermined	Undetermined	Undetermined	Undetermined	Undetermined	Undetermined	Undetermined	Undetermined	Undetermined	Undetermined	Undetermined	Undetermined	32.1206	32.1865	Undetermined	30.673	29.0047	29.1448	28.1103	31.5975	28.2504	29.1749	26.9552
A3	416	hsa-miR-30a-3p	29.0618	28.3145	28.387	29.5281	27.6412	29.197	28.5088	29.052	28.7211	29.0201	29.6678	28.2269	17.6298	18.642	18.4887	16.6019	16.6353	16.8298	Undetermined	15.7864	17.3885	16.1246	15.7081	15.1635
A4	417	hsa-miR-30a-5p	24.8735	23.2956	22.908	24.0106	22.6169	23.6833	22.2743	22.7548	21.9641	22.3693	23.248	21.7366	16.147	16.5967	16.8855	15.66	16.0882	15.6318	15.2803	14.9738	15.8218	14.6505	14.9357	14.0009
A5	420	hsa-miR-30d	27.879	25.7382	25.276	26.6311	25.5584	26.6745	24.7542	25.6647	24.5569	25.0834	26.0892	23.9344	20.0389	19.9564	20.1541	19.1706	20.6571	19.4562	19.0466	18.4869	19.7519	18.6221	18.2958	17.6416
A6	422	hsa-miR-30e-3p	28.7984	26.6965	26.0182	26.8269	26.1501	27.3316	25.9726	26.8651	25.7293	Undetermined	26.8068	25.136	17.9516	18.604	18.4188	16.9476	16.8188	17.0236	16.8681	15.9594	17.6761	16.2122	15.905	15.3892
A7	427	hsa-miR-34b	Undetermined	Undetermined	Undetermined	Undetermined	Undetermined	Undetermined	Undetermined	Undetermined	Undetermined	Undetermined	Undetermined	Undetermined	31.4022	27.5927	32.7315	32.3307	30.3716	33.391	34.2144	32.2152	33.7592	32.9215	33.7333	30.3343
A8	451	hsa-miR-126#	25.2837	23.0421	22.7258	23.611	22.7018	24.121	22.4471	23.7582	21.9724	22.6467	23.6797	22.0165	18.7158	16.8258	18.3117	17.5206	17.8817	17.3823	19.0504	18.9681	21.0234	19.6446	18.9016	17.532
A9	478	hsa-miR-154#	Undetermined	33.3395	Undetermined	35.2557	Undetermined	34.101	Undetermined	Undetermined	Undetermined	Undetermined	Undetermined	Undetermined	35.6685	28.599	35.4309	32.4947	34.1453	32.93	30.6219	29.6327	33.3583	31.7307	32.7669	33.8295
B1	2927	hsa-miR-1238	Undetermined	Undetermined	Undetermined	Undetermined	Undetermined	Undetermined	Undetermined	Undetermined	Undetermined	Undetermined	Undetermined	Undetermined	Undetermined	Undetermined	Undetermined	Undetermined	Undetermined	Undetermined	Undetermined	Undetermined	Undetermined	Undetermined	Undetermined	Undetermined
B10	1283	hsa-miR-363#	Undetermined	Undetermined	Undetermined	Undetermined	Undetermined	Undetermined	Undetermined	Undetermined	Undetermined	Undetermined	Undetermined	Undetermined	Undetermined	Undetermined	Undetermined	Undetermined	Undetermined	Undetermined	Undetermined	Undetermined	Undetermined	30.9348	Undetermined	30.4755
B11	1973	U6 snRNA	26.6064	27.2935	26.6343	25.8409	25.6533	25.9845	22.5773	21.7597	23.8	25.6727	24.6521	21.109	15.4097	13.8594	15.1649	14.2255	13.1841	16.0501	13.7929	13.7461	15.8047	14.8978	14.082	14.5004
B12	1973	U6 snRNA	26.429	27.4594	26.782	31.4076	25.613	25.9804	22.3602	21.8204	24.2186	25.724	24.5061	20.9703	15.5695	13.8378	14.861	14.2092	13.2648	16.0462	14.1756	13.7176	15.8221	14.8107	14.0068	14.4604
B13	1338	hsa-miR-7#	31.5734	30.1702	29.3447	29.8685	28.3765	29.9427	26.1673	31.4101	27.4647	29.3276	31.0404	26.2777	24.0497	22.3727	23.8227	24.1786	23.193	23.2562	24.5951	23.5116	27.7502	24.7272	24.9282	23.0979
B14	1510	hsa-miR-656	Undetermined	33.1419	34.7728	35.1657	36.7778	Undetermined	33.8299	Undetermined	38.1124	Undetermined	37.0726	34.1185	31.1783	27.7755	33.0924	30.8398	30.3278	30.8372	28.631	28.2699	Undetermined	31.0958	Undetermined	29.0861
B15	1511	hsa-miR-549	Undetermined	Undetermined	Undetermined	Undetermined	Undetermined	Undetermined	Undetermined	Undetermined	Undetermined	Undetermined	Undetermined	Undetermined	Undetermined	Undetermined	Undetermined	Undetermined	Undetermined	Undetermined	Undetermined	Undetermined	Undetermined	35.9329	Undetermined	Undetermined
B16	1512	hsa-miR-657	Undetermined	Undetermined	Undetermined	Undetermined	Undetermined	Undetermined	Undetermined	Undetermined	Undetermined	Undetermined	Undetermined	Undetermined	Undetermined	Undetermined	Undetermined	Undetermined	Undetermined	Undetermined	Undetermined	Undetermined	Undetermined	Undetermined	Undetermined	Undetermined
B17	1513	hsa-miR-658	Undetermined	Undetermined	Undetermined	Undetermined	Undetermined	Undetermined	Undetermined	Undetermined	Undetermined	Undetermined	Undetermined	Undetermined	Undetermined	Undetermined	Undetermined	Undetermined	Undetermined	Undetermined	Undetermined	Undetermined	Undetermined	Undetermined	Undetermined	Undetermined
B18	1514	hsa-miR-659	Undetermined	Undetermined	Undetermined	Undetermined	Undetermined	Undetermined	Undetermined	Undetermined	Undetermined	Undetermined	Undetermined	Undetermined	Undetermined	Undetermined	Undetermined	Undetermined	Undetermined	Undetermined	Undetermined	Undetermined	Undetermined	Undetermined	Undetermined	Undetermined
B19	1519	hsa-miR-551a	Undetermined	36.347	Undetermined	Undetermined	37.3123	Undetermined	36.2899	Undetermined	Undetermined	38.1611	Undetermined	Undetermined	Undetermined	38.1485	Undetermined	Undetermined	Undetermined	Undetermined	Undetermined	Undetermined	Undetermined	Undetermined	Undetermined	35.0723
B2	1106	hsa-miR-488	Undetermined	Undetermined	Undetermined	Undetermined	Undetermined	Undetermined	33.1355	35.745	38.1708	34.0169	Undetermined	32.2913	Undetermined	Undetermined	Undetermined	Undetermined	Undetermined	Undetermined	35.8407	33.7561	Undetermined	Undetermined	33.5329	32.7408
B20	1520	hsa-miR-552	Undetermined	Undetermined	Undetermined	Undetermined	Undetermined	Undetermined	Undetermined	Undetermined	Undetermined	Undetermined	Undetermined	Undetermined	Undetermined	Undetermined	Undetermined	Undetermined	Undetermined	Undetermined	Undetermined	Undetermined	Undetermined	Undetermined	Undetermined	Undetermined
B21	1521	hsa-miR-553	Undetermined	Undetermined	Undetermined	Undetermined	Undetermined	Undetermined	Undetermined	Undetermined	Undetermined	Undetermined	Undetermined	Undetermined	Undetermined	Undetermined	Undetermined	Undetermined	Undetermined	Undetermined	Undetermined	Undetermined	Undetermined	Undetermined	Undetermined	Undetermined
B22	1522	hsa-miR-554	Undetermined	Undetermined	Undetermined	Undetermined	Undetermined	Undetermined	Undetermined	Undetermined	Undetermined	Undetermined	Undetermined	Undetermined	Undetermined	Undetermined	Undetermined	Undetermined	Undetermined	Undetermined	Undetermined	Undetermined	34.0432	Undetermined	33.4555	Undetermined
B23	1523	hsa-miR-555	Undetermined	Undetermined	Undetermined	Undetermined	Undetermined	Undetermined	Undetermined	Undetermined	Undetermined	Undetermined	Undetermined	Undetermined	Undetermined	Undetermined	Undetermined	Undetermined	Undetermined	34.5577	Undetermined	Undetermined	Undetermined	Undetermined	Undetermined	Undetermined
B24	1525	hsa-miR-557	Undetermined	Undetermined	Undetermined	Undetermined	Undetermined	Undetermined	Undetermined	Undetermined	Undetermined	Undetermined	Undetermined	Undetermined	Undetermined	Undetermined	Undetermined	Undetermined	Undetermined	Undetermined	Undetermined	Undetermined	Undetermined	Undetermined	Undetermined	Undetermined
B3	1113	hsa-miR-517#	Undetermined	Undetermined	Undetermined	Undetermined	Undetermined	Undetermined	Undetermined	Undetermined	Undetermined	Undetermined	Undetermined	Undetermined	Undetermined	Undetermined	Undetermined	Undetermined	Undetermined	Undetermined	Undetermined	Undetermined	Undetermined	Undetermined	Undetermined	Undetermined
B4	1149	hsa-miR-516-3p	Undetermined	Undetermined	33.349	32.6639	34.0239	34.5117	32.916	33.1595	34.094	Undetermined	35.0242	31.0024	30.5384	29.3258	30.968	30.0059	30.8907	31.6585	30.9798	30.2546	31.5928	31.8963	31.0578	31.1137
B5	1158	hsa-miR-518c#	Undetermined	Undetermined	Undetermined	Undetermined	Undetermined	Undetermined	Undetermined	Undetermined	Undetermined	Undetermined	Undetermined	Undetermined	Undetermined	Undetermined	Undetermined	Undetermined	Undetermined	Undetermined	Undetermined	Undetermined	Undetermined	Undetermined	Undetermined	Undetermined
B6	1166	hsa-miR-519e#	Undetermined	Undetermined	Undetermined	Undetermined	Undetermined	Undetermined	Undetermined	Undetermined	Undetermined	Undetermined	Undetermined	Undetermined	Undetermined	Undetermined	Undetermined	Undetermined	Undetermined	Undetermined	Undetermined	Undetermined	Undetermined	Undetermined	Undetermined	Undetermined
B7	1170	hsa-miR-520h	Undetermined	Undetermined	Undetermined	Undetermined	Undetermined	Undetermined	Undetermined	Undetermined	Undetermined	Undetermined	Undetermined	34.4827	Undetermined	Undetermined	Undetermined	Undetermined	Undetermined	Undetermined	Undetermined	Undetermined	Undetermined	36.2614	Undetermined	Undetermined
B8	1173	hsa-miR-524	Undetermined	Undetermined	Undetermined	Undetermined	Undetermined	Undetermined	Undetermined	Undetermined	Undetermined	Undetermined	Undetermined	Undetermined	Undetermined	36.393	Undetermined	Undetermined	Undetermined	Undetermined	Undetermined	Undetermined	Undetermined	34.6215	35.8167	37.4924
B9	1178	hsa-let-7d#	Undetermined	Undetermined	Undetermined	Undetermined	Undetermined	Undetermined	Undetermined	Undetermined	Undetermined	Undetermined	Undetermined	Undetermined	Undetermined	Undetermined	Undetermined	Undetermined	Undetermined	Undetermined	Undetermined	Undetermined	Undetermined	Undetermined	Undetermined	Undetermined
C1	1526	hsa-miR-558	Undetermined	Undetermined	Undetermined	Undetermined	Undetermined	Undetermined	Undetermined	Undetermined	Undetermined	Undetermined	Undetermined	Undetermined	Undetermined	Undetermined	Undetermined	Undetermined	Undetermined	Undetermined	Undetermined	Undetermined	Undetermined	Undetermined	Undetermined	Undetermined
C10	1540	hsa-miR-587	Undetermined	Undetermined	Undetermined	Undetermined	Undetermined	Undetermined	Undetermined	Undetermined	Undetermined	Undetermined	Undetermined	Undetermined	Undetermined	Undetermined	Undetermined	Undetermined	Undetermined	Undetermined	Undetermined	Undetermined	Undetermined	Undetermined	Undetermined	Undetermined
C11	1094	RNU44	Undetermined	Undetermined	Undetermined	Undetermined	Undetermined	32.7282	28.8021	31.8973	Undetermined	Undetermined	Undetermined	Undetermined	19.7405	18.6927	20.2465	18.9711	18.3588	19.29	18.9891	18.7537	20.8018	19.8514	18.2262	19.1962
C12	1542	hsa-miR-588	Undetermined	Undetermined	Undetermined	Undetermined	Undetermined	Undetermined	Undetermined	Undetermined	Undetermined	Undetermined	Undetermined	Undetermined	Undetermined	Undetermined	Undetermined	Undetermined	Undetermined	Undetermined	Undetermined	Undetermined	Undetermined	Undetermined	Undetermined	Undetermined
C13	1543	hsa-miR-589	Undetermined	Undetermined	Undetermined	Undetermined	34.568	Undetermined	31.9792	Undetermined	Undetermined	Undetermined	33.8717	34.5726	32.0501	28.719	32.9184	31.5315	31.3201	29.3833	32.111	30.149	Undetermined	31.0785	29.9861	29.3322
C14	1544	hsa-miR-550	Undetermined	Undetermined	38.7406	Undetermined	Undetermined	Undetermined	39.3569	Undetermined	Undetermined	Undetermined	Undetermined	Undetermined	Undetermined	33.8856	Undetermined	33.8145	33.5187	35.4441	Undetermined	36.4337	Undetermined	35.2548	Undetermined	34.7763
C15	1545	hsa-miR-591	Undetermined	Undetermined	Undetermined	Undetermined	33.5562	Undetermined	Undetermined	Undetermined	34.6273	31.8827	33.6024	32.4577	31.6292	32.1528	Undetermined	31.2359	36.5625	Undetermined	32.7213	Undetermined	34.1975	35.1707	Undetermined	32.5974
C16	1546	hsa-miR-592	33.9314	Undetermined	Undetermined	Undetermined	32.3001	Undetermined	Undetermined	Undetermined	Undetermined	35.8904	Undetermined	Undetermined	26.2691	23.6827	24.6913	24.7373	24.188	27.2602	29.4528	27.6656	30.0713	27.8379	29.232	26.9959
C17	1547	hsa-miR-593	Undetermined	Undetermined	Undetermined	Undetermined	Undetermined	Undetermined	Undetermined	Undetermined	Undetermined	Undetermined	Undetermined	Undetermined	Undetermined	Undetermined	Undetermined	Undetermined	Undetermined	Undetermined	Undetermined	Undetermined	Undetermined	Undetermined	Undetermined	Undetermined
C18	1550	hsa-miR-596	Undetermined	Undetermined	Undetermined	Undetermined	Undetermined	Undetermined	Undetermined	Undetermined	Undetermined	Undetermined	Undetermined	Undetermined	Undetermined	Undetermined	Undetermined	Undetermined	Undetermined	Undetermined	Undetermined	Undetermined	Undetermined	Undetermined	Undetermined	Undetermined
C19	1553	hsa-miR-622	Undetermined	Undetermined	Undetermined	Undetermined	Undetermined	Undetermined	Undetermined	Undetermined	Undetermined	Undetermined	Undetermined	Undetermined	34.1458	Undetermined	Undetermined	Undetermined	Undetermined	33.6436	28.849	Undetermined	32.5462	34.1145	30.4592	32.0781
C2	1527	hsa-miR-559	Undetermined	Undetermined	Undetermined	Undetermined	Undetermined	Undetermined	Undetermined	Undetermined	Undetermined	Undetermined	Undetermined	Undetermined	Undetermined	Undetermined	Undetermined	Undetermined	Undetermined	Undetermined	Undetermined	Undetermined	Undetermined	Undetermined	Undetermined	Undetermined
C20	1554	hsa-miR-599	Undetermined	Undetermined	Undetermined	36.773	Undetermined	Undetermined	Undetermined	Undetermined	33.315	Undetermined	Undetermined	37.2323	Undetermined	Undetermined	Undetermined	Undetermined	33.5309	33.4439	Undetermined	38.8357	Undetermined	Undetermined	35.3194	Undetermined
C21	1555	hsa-miR-623	Undetermined	Undetermined	Undetermined	Undetermined	38.1933	35.885	Undetermined	34.2401	Undetermined	Undetermined	Undetermined	Undetermined	35.8003	Undetermined	36.0313	Undetermined	Undetermined	34.8975	33.5709	Undetermined	Undetermined	Undetermined	Undetermined	Undetermined
C22	1556	hsa-miR-600	Undetermined	Undetermined	Undetermined	Undetermined	Undetermined	Undetermined	Undetermined	Undetermined	Undetermined	Undetermined	Undetermined	Undetermined	Undetermined	Undetermined	Undetermined	Undetermined	Undetermined	Undetermined	Undetermined	Undetermined	Undetermined	Undetermined	Undetermined	Undetermined
C23	1557	hsa-miR-624	Undetermined	32.9595	37.5792	Undetermined	32.9855	32.5801	35.5887	Undetermined	39.9975	Undetermined	33.185	32.938	32.4587	32.3649	31.8726	31.7402	31.0479	31.5077	35.4622	33.2488	33.2389	31.8723	31.5082	30.681
C24	1558	hsa-miR-601	33.0524	33.8763	31.5244	33.599	34.5723	36.211	32.0827	30.474	33.2953	35.7418	33.9271	29.8052	28.6118	27.9172	29.2695	29.9976	29.5631	29.3482	28.2157	28.7763	28.396	29.5735	28.7295	28.6582
C3	1529	hsa-miR-562	Undetermined	Undetermined	Undetermined	Undetermined	Undetermined	Undetermined	Undetermined	Undetermined	Undetermined	Undetermined	Undetermined	Undetermined	Undetermined	Undetermined	Undetermined	Undetermined	Undetermined	Undetermined	Undetermined	Undetermined	Undetermined	Undetermined	Undetermined	Undetermined
C4	1530	hsa-miR-563	Undetermined	Undetermined	Undetermined	Undetermined	Undetermined	Undetermined	Undetermined	Undetermined	Undetermined	Undetermined	Undetermined	Undetermined	Undetermined	Undetermined	Undetermined	Undetermined	Undetermined	Undetermined	Undetermined	Undetermined	Undetermined	Undetermined	Undetermined	Undetermined
C5	1531	hsa-miR-564	Undetermined	Undetermined	Undetermined	Undetermined	Undetermined	Undetermined	Undetermined	Undetermined	32.6143	Undetermined	Undetermined	Undetermined	31.4115	30.3364	31.3293	31.526	30.0764	30.5283	28.9571	29.2806	30.849	29.0482	28.3718	29.0053
C6	1533	hsa-miR-566	Undetermined	Undetermined	Undetermined	Undetermined	Undetermined	Undetermined	Undetermined	Undetermined	Undetermined	Undetermined	Undetermined	Undetermined	Undetermined	Undetermined	Undetermined	Undetermined	Undetermined	Undetermined	Undetermined	Undetermined	Undetermined	Undetermined	Undetermined	Undetermined
C7	1534	hsa-miR-567	Undetermined	Undetermined	Undetermined	Undetermined	Undetermined	Undetermined	Undetermined	Undetermined	Undetermined	Undetermined	Undetermined	Undetermined	Undetermined	Undetermined	Undetermined	Undetermined	Undetermined	Undetermined	Undetermined	Undetermined	Undetermined	Undetermined	Undetermined	Undetermined
C8	1536	hsa-miR-569	Undetermined	Undetermined	Undetermined	Undetermined	Undetermined	Undetermined	Undetermined	Undetermined	Undetermined	Undetermined	Undetermined	Undetermined	37.0858	Undetermined	Undetermined	Undetermined	Undetermined	Undetermined	Undetermined	Undetermined	Undetermined	Undetermined	Undetermined	Undetermined
C9	1539	hsa-miR-586	Undetermined	Undetermined	Undetermined	Undetermined	Undetermined	Undetermined	Undetermined	Undetermined	Undetermined	Undetermined	Undetermined	Undetermined	35.8143	Undetermined	Undetermined	Undetermined	Undetermined	35.6638	Undetermined	Undetermined	Undetermined	Undetermined	Undetermined	Undetermined
D1	1559	hsa-miR-626	Undetermined	Undetermined	Undetermined	Undetermined	Undetermined	Undetermined	Undetermined	Undetermined	Undetermined	Undetermined	Undetermined	Undetermined	Undetermined	Undetermined	Undetermined	Undetermined	Undetermined	Undetermined	Undetermined	Undetermined	Undetermined	Undetermined	Undetermined	Undetermined
D10	1571	hsa-miR-608	Undetermined	Undetermined	Undetermined	Undetermined	Undetermined	Undetermined	Undetermined	Undetermined	Undetermined	Undetermined	Undetermined	Undetermined	Undetermined	Undetermined	Undetermined	Undetermined	Undetermined	Undetermined	Undetermined	Undetermined	Undetermined	Undetermined	Undetermined	Undetermined
D11	1573	hsa-miR-609	Undetermined	Undetermined	Undetermined	Undetermined	Undetermined	Undetermined	Undetermined	Undetermined	Undetermined	Undetermined	Undetermined	Undetermined	Undetermined	Undetermined	Undetermined	Undetermined	Undetermined	Undetermined	Undetermined	Undetermined	Undetermined	Undetermined	Undetermined	Undetermined
D12	1574	hsa-miR-633	Undetermined	Undetermined	Undetermined	Undetermined	Undetermined	Undetermined	Undetermined	Undetermined	Undetermined	Undetermined	Undetermined	Undetermined	Undetermined	Undetermined	Undetermined	Undetermined	Undetermined	Undetermined	Undetermined	Undetermined	Undetermined	Undetermined	Undetermined	Undetermined
D13	1576	hsa-miR-634	Undetermined	Undetermined	Undetermined	Undetermined	Undetermined	Undetermined	Undetermined	Undetermined	Undetermined	Undetermined	Undetermined	Undetermined	Undetermined	Undetermined	Undetermined	Undetermined	Undetermined	Undetermined	Undetermined	Undetermined	Undetermined	Undetermined	Undetermined	Undetermined
D14	1578	hsa-miR-635	Undetermined	Undetermined	Undetermined	Undetermined	Undetermined	Undetermined	Undetermined	Undetermined	Undetermined	Undetermined	Undetermined	Undetermined	Undetermined	34.2504	32.9588	34.8332	33.7101	34.0681	31.0828	34.0412	30.258	30.5246	29.3495	30.7045
D15	1581	hsa-miR-637	Undetermined	Undetermined	Undetermined	Undetermined	Undetermined	Undetermined	Undetermined	Undetermined	Undetermined	Undetermined	Undetermined	Undetermined	Undetermined	Undetermined	Undetermined	Undetermined	Undetermined	Undetermined	Undetermined	Undetermined	Undetermined	Undetermined	Undetermined	Undetermined
D16	1582	hsa-miR-638	Undetermined	Undetermined	34.1153	35.107	Undetermined	35.5936	35.3699	32.6363	33.7858	33.1199	33.1419	30.3597	30.8173	29.2671	31.3855	30.0281	30.8082	30.2406	29.17	29.9717	28.0963	29.6066	28.6492	29.9601
D17	1583	hsa-miR-639	Undetermined	Undetermined	Undetermined	35.1274	Undetermined	Undetermined	Undetermined	Undetermined	Undetermined	Undetermined	Undetermined	Undetermined	33.1649	31.8139	Undetermined	Undetermined	Undetermined	Undetermined	29.2145	31.1569	28.4597	28.3673	28.7143	29.1661
D18	1584	hsa-miR-640	Undetermined	Undetermined	Undetermined	Undetermined	Undetermined	Undetermined	Undetermined	Undetermined	Undetermined	Undetermined	Undetermined	Undetermined	Undetermined	Undetermined	Undetermined	Undetermined	Undetermined	Undetermined	Undetermined	Undetermined	Undetermined	Undetermined	Undetermined	Undetermined
D19	1585	hsa-miR-641	Undetermined	Undetermined	Undetermined	38.1278	Undetermined	Undetermined	38.2218	Undetermined	Undetermined	Undetermined	Undetermined	Undetermined	33.9876	34.5058	Undetermined	Undetermined	37.8487	Undetermined	33.6948	Undetermined	36.3295	32.3544	34.8055	32.9069
D2	1562	hsa-miR-629	32.5038	32.7426	32.9505	Undetermined	32.003	34.2661	31.0994	31.1004	34.9579	32.8162	31.3833	30.1041	27.6814	25.6696	27.6529	27.6923	26.7629	26.1645	28.2144	27.241	30.0368	28.1453	27.4954	26.9165
D20	1586	hsa-miR-613	Undetermined	Undetermined	Undetermined	Undetermined	Undetermined	Undetermined	Undetermined	Undetermined	Undetermined	Undetermined	Undetermined	Undetermined	35.4627	Undetermined	Undetermined	Undetermined	Undetermined	Undetermined	Undetermined	Undetermined	Undetermined	Undetermined	Undetermined	Undetermined
D21	1587	hsa-miR-614	Undetermined	Undetermined	Undetermined	Undetermined	Undetermined	Undetermined	Undetermined	Undetermined	Undetermined	Undetermined	Undetermined	Undetermined	Undetermined	Undetermined	Undetermined	Undetermined	Undetermined	Undetermined	Undetermined	Undetermined	Undetermined	Undetermined	Undetermined	Undetermined
D22	1589	hsa-miR-616	Undetermined	34.4051	35.8202	Undetermined	32.911	35.9478	34.9844	Undetermined	33.3419	33.7433	Undetermined	33.7357	29.8371	28.7122	30.8743	29.1919	29.8114	Undetermined	29.8731	29.0156	31.438	29.4461	29.8079	29.0994
D23	1591	hsa-miR-617	Undetermined	Undetermined	Undetermined	35.9759	Undetermined	Undetermined	Undetermined	Undetermined	34.3412	36.481	Undetermined	36.237	Undetermined	Undetermined	Undetermined	34.3596	Undetermined	Undetermined	32.9959	Undetermined	Undetermined	Undetermined	Undetermined	34.6578
D24	1594	hsa-miR-643	Undetermined	Undetermined	Undetermined	Undetermined	Undetermined	Undetermined	Undetermined	Undetermined	Undetermined	35.1655	Undetermined	Undetermined	34.2077	Undetermined	Undetermined	Undetermined	Undetermined	Undetermined	Undetermined	Undetermined	Undetermined	Undetermined	Undetermined	33.7762
D3	1563	hsa-miR-630	Undetermined	Undetermined	Undetermined	Undetermined	Undetermined	Undetermined	Undetermined	Undetermined	Undetermined	Undetermined	Undetermined	36.3796	Undetermined	Undetermined	Undetermined	Undetermined	34.2175	Undetermined	33.8603	Undetermined	32.219	34.5633	32.4299	Undetermined
D4	1564	hsa-miR-631	Undetermined	Undetermined	Undetermined	Undetermined	Undetermined	Undetermined	Undetermined	Undetermined	Undetermined	Undetermined	Undetermined	Undetermined	Undetermined	Undetermined	Undetermined	Undetermined	Undetermined	Undetermined	Undetermined	Undetermined	Undetermined	Undetermined	Undetermined	Undetermined
D5	1566	hsa-miR-603	Undetermined	Undetermined	Undetermined	Undetermined	34.2459	Undetermined	Undetermined	34.7966	Undetermined	Undetermined	34.2538	Undetermined	33.0923	35.2077	Undetermined	Undetermined	Undetermined	Undetermined	Undetermined	Undetermined	Undetermined	Undetermined	Undetermined	34.5706
D6	1567	hsa-miR-604	Undetermined	Undetermined	Undetermined	Undetermined	Undetermined	Undetermined	34.0213	Undetermined	Undetermined	Undetermined	Undetermined	Undetermined	32.8204	33.2381	35.3374	35.582	33.5823	32.7301	31.3142	35.7887	31.9536	31.1134	31.6302	33.0067
D7	1568	hsa-miR-605	Undetermined	Undetermined	Undetermined	Undetermined	Undetermined	Undetermined	35.1835	Undetermined	32.9696	33.1047	33.3682	30.7634	33.5123	Undetermined	Undetermined	Undetermined	Undetermined	Undetermined	Undetermined	34.7724	Undetermined	Undetermined	Undetermined	Undetermined
D8	1569	hsa-miR-606	Undetermined	Undetermined	Undetermined	Undetermined	Undetermined	Undetermined	Undetermined	Undetermined	35.7994	Undetermined	Undetermined	Undetermined	36.2787	Undetermined	Undetermined	Undetermined	37.5407	34.6968	34.9464	Undetermined	37.2526	Undetermined	Undetermined	Undetermined
D9	1570	hsa-miR-607	Undetermined	Undetermined	Undetermined	Undetermined	Undetermined	Undetermined	Undetermined	Undetermined	Undetermined	Undetermined	Undetermined	Undetermined	Undetermined	Undetermined	Undetermined	Undetermined	Undetermined	Undetermined	Undetermined	Undetermined	Undetermined	Undetermined	Undetermined	Undetermined
E1	1596	hsa-miR-644	Undetermined	Undetermined	Undetermined	Undetermined	Undetermined	37.1458	Undetermined	Undetermined	Undetermined	Undetermined	Undetermined	Undetermined	Undetermined	Undetermined	Undetermined	Undetermined	Undetermined	Undetermined	Undetermined	Undetermined	Undetermined	Undetermined	Undetermined	Undetermined
E10	1607	hsa-miR-662	Undetermined	Undetermined	Undetermined	Undetermined	Undetermined	Undetermined	Undetermined	Undetermined	Undetermined	Undetermined	Undetermined	Undetermined	Undetermined	Undetermined	35.0018	Undetermined	Undetermined	35.3362	Undetermined	Undetermined	Undetermined	Undetermined	Undetermined	Undetermined
E11	1006	RNU48	36.1219	33.8035	32.2572	33.3436	29.6022	28.7154	25.3042	26.4848	30.2148	33.8583	29.1845	29.3601	18.5211	16.2546	17.5875	17.0878	16.5985	17.3623	17.0532	15.8102	17.5533	16.6825	15.0336	16.2533
E12	1613	hsa-miR-571	33.4792	Undetermined	Undetermined	Undetermined	Undetermined	Undetermined	Undetermined	Undetermined	Undetermined	Undetermined	Undetermined	31.5535	28.8213	28.4631	29.4647	31.7413	30.6165	29.0637	27.0112	28.6663	29.7783	28.5494	30.5827	26.9331
E13	1614	hsa-miR-572	35.8187	Undetermined	32.4987	33.4434	32.7454	33.5159	37.4667	35.8867	Undetermined	33.5447	35.0601	31.2612	30.7947	29.8797	30.7995	31.2961	31.4406	30.7613	30.0328	32.0588	29.7978	31.724	29.5549	29.6431
E14	1615	hsa-miR-573	Undetermined	Undetermined	36.1447	Undetermined	Undetermined	Undetermined	Undetermined	Undetermined	Undetermined	Undetermined	37.3391	33.5748	Undetermined	Undetermined	Undetermined	Undetermined	Undetermined	Undetermined	Undetermined	Undetermined	Undetermined	35.8021	Undetermined	34.1576
E15	1617	hsa-miR-575	Undetermined	Undetermined	Undetermined	Undetermined	Undetermined	Undetermined	Undetermined	Undetermined	Undetermined	Undetermined	Undetermined	Undetermined	Undetermined	Undetermined	Undetermined	Undetermined	Undetermined	Undetermined	Undetermined	Undetermined	Undetermined	Undetermined	Undetermined	Undetermined
E16	1619	hsa-miR-578	Undetermined	Undetermined	Undetermined	37.0124	Undetermined	Undetermined	Undetermined	Undetermined	Undetermined	Undetermined	Undetermined	Undetermined	Undetermined	Undetermined	Undetermined	Undetermined	Undetermined	Undetermined	Undetermined	Undetermined	Undetermined	36.0183	Undetermined	Undetermined
E17	1621	hsa-miR-580	Undetermined	Undetermined	Undetermined	Undetermined	Undetermined	Undetermined	Undetermined	Undetermined	Undetermined	37.7236	Undetermined	Undetermined	Undetermined	33.1486	Undetermined	34.4308	33.1377	31.7963	33.1672	34.458	34.194	Undetermined	Undetermined	32.4875
E18	1622	hsa-miR-581	Undetermined	Undetermined	Undetermined	Undetermined	Undetermined	Undetermined	Undetermined	Undetermined	Undetermined	Undetermined	Undetermined	Undetermined	36.6571	31.349	34.9984	Undetermined	37.1825	31.867	Undetermined	34.3504	36.2564	Undetermined	Undetermined	32.8028
E19	1623	hsa-miR-583	Undetermined	Undetermined	Undetermined	Undetermined	Undetermined	Undetermined	Undetermined	Undetermined	Undetermined	Undetermined	Undetermined	Undetermined	Undetermined	Undetermined	Undetermined	Undetermined	Undetermined	Undetermined	Undetermined	Undetermined	Undetermined	Undetermined	Undetermined	Undetermined
E2	1597	hsa-miR-645	33.9789	30.934	30.882	30.7109	30.5969	30.698	31.973	29.7487	29.7719	Undetermined	31.5627	31.3695	29.3547	29.3887	30.0935	29.4775	30.3455	29.9173	29.2013	29.9456	29.5202	29.5336	30.2419	30.6816
E20	1624	hsa-miR-584	33.8176	34.2711	32.1443	Undetermined	32.6153	35.8385	29.3532	Undetermined	32.1198	32.567	Undetermined	Undetermined	Undetermined	Undetermined	Undetermined	Undetermined	Undetermined	Undetermined	Undetermined	Undetermined	Undetermined	Undetermined	Undetermined	Undetermined
E21	1625	hsa-miR-585	Undetermined	Undetermined	Undetermined	Undetermined	Undetermined	Undetermined	Undetermined	Undetermined	Undetermined	Undetermined	Undetermined	Undetermined	Undetermined	Undetermined	Undetermined	Undetermined	Undetermined	Undetermined	Undetermined	Undetermined	Undetermined	Undetermined	Undetermined	Undetermined
E22	1818	hsa-miR-29c#	36.1271	34.9393	33.2168	37.1165	32.9747	36.9386	32.051	Undetermined	33.6859	31.9505	35.4064	30.7418	25.8373	26.3337	26.8912	25.6804	25.6684	25.0755	24.3551	24.6946	25.7922	24.7494	24.385	24.031
E23	1986	hsa-miR-766	28.2618	27.1131	26.3438	27.5127	26.153	28.855	25.1525	28.0687	25.8848	26.4683	27.8709	27.298	28.0903	23.984	25.5593	26.7265	25.2232	24.9616	26.4516	24.7723	29.692	26.1274	24.6752	24.5348
E24	1987	hsa-miR-595	Undetermined	Undetermined	Undetermined	Undetermined	Undetermined	Undetermined	Undetermined	Undetermined	Undetermined	Undetermined	Undetermined	Undetermined	Undetermined	Undetermined	Undetermined	Undetermined	Undetermined	Undetermined	Undetermined	Undetermined	Undetermined	Undetermined	Undetermined	Undetermined
E3	1598	hsa-miR-621	Undetermined	Undetermined	Undetermined	Undetermined	Undetermined	Undetermined	Undetermined	Undetermined	Undetermined	Undetermined	Undetermined	Undetermined	Undetermined	Undetermined	Undetermined	Undetermined	Undetermined	Undetermined	Undetermined	Undetermined	Undetermined	Undetermined	Undetermined	Undetermined
E4	1599	hsa-miR-646	Undetermined	Undetermined	Undetermined	Undetermined	Undetermined	Undetermined	Undetermined	Undetermined	Undetermined	Undetermined	Undetermined	Undetermined	Undetermined	Undetermined	Undetermined	Undetermined	Undetermined	Undetermined	Undetermined	Undetermined	Undetermined	Undetermined	Undetermined	Undetermined
E5	1600	hsa-miR-647	Undetermined	Undetermined	Undetermined	Undetermined	Undetermined	Undetermined	Undetermined	Undetermined	Undetermined	Undetermined	Undetermined	Undetermined	Undetermined	Undetermined	Undetermined	Undetermined	Undetermined	Undetermined	Undetermined	Undetermined	Undetermined	Undetermined	Undetermined	Undetermined
E6	1601	hsa-miR-648	Undetermined	Undetermined	Undetermined	Undetermined	Undetermined	Undetermined	Undetermined	Undetermined	Undetermined	Undetermined	Undetermined	Undetermined	Undetermined	Undetermined	Undetermined	Undetermined	Undetermined	Undetermined	Undetermined	Undetermined	Undetermined	Undetermined	Undetermined	Undetermined
E7	1602	hsa-miR-649	38.3829	38.5988	Undetermined	Undetermined	Undetermined	Undetermined	Undetermined	Undetermined	38.5016	Undetermined	Undetermined	Undetermined	36.8007	Undetermined	37.9043	Undetermined	Undetermined	37.1239	33.4558	Undetermined	33.409	33.6696	Undetermined	36.4335
E8	1603	hsa-miR-650	Undetermined	Undetermined	Undetermined	Undetermined	Undetermined	Undetermined	Undetermined	Undetermined	Undetermined	Undetermined	Undetermined	Undetermined	Undetermined	24.1702	28.9388	Undetermined	Undetermined	27.2128	26.5878	27.3118	26.6506	27.3699	25.1776	26.5866
E9	1606	hsa-miR-661	Undetermined	31.2404	28.4786	Undetermined	30.8588	32.1203	Undetermined	Undetermined	26.5208	27.2209	29.5357	24.5183	25.3829	24.3131	27.3439	26.5531	28.685	24.9815	24.3414	26.9587	25.732	25.6759	25.8707	25.3101
F1	1992	hsa-miR-668	Undetermined	Undetermined	Undetermined	Undetermined	Undetermined	Undetermined	Undetermined	Undetermined	Undetermined	Undetermined	Undetermined	Undetermined	Undetermined	Undetermined	Undetermined	Undetermined	Undetermined	Undetermined	Undetermined	Undetermined	Undetermined	Undetermined	Undetermined	Undetermined
F10	2087	hsa-miR-505#	35.1236	31.3205	31.7073	31.5092	31.6213	34.1419	29.629	34.2973	31.051	32.1652	32.183	31.337	26.7488	24.9038	26.3432	25.5594	25.5702	25.6068	25.6808	24.7626	26.9413	25.9699	24.6473	24.7082
F11	2094	hsa-miR-218-1#	Undetermined	Undetermined	Undetermined	Undetermined	Undetermined	Undetermined	Undetermined	Undetermined	Undetermined	Undetermined	Undetermined	Undetermined	Undetermined	Undetermined	Undetermined	Undetermined	Undetermined	Undetermined	Undetermined	Undetermined	Undetermined	Undetermined	Undetermined	Undetermined
F12	2096	hsa-miR-221#	Undetermined	Undetermined	Undetermined	Undetermined	Undetermined	Undetermined	Undetermined	Undetermined	Undetermined	Undetermined	Undetermined	35.2802	32.4604	30.3153	33.9935	32.2945	30.5476	31.7586	31.7342	30.8465	34.3599	31.7698	31.6839	30.5512
F13	2097	hsa-miR-222#	Undetermined	Undetermined	Undetermined	Undetermined	Undetermined	Undetermined	Undetermined	Undetermined	Undetermined	Undetermined	Undetermined	Undetermined	27.6003	25.5752	28.1046	28.1307	27.2793	27.4147	24.0413	26.3501	27.5907	26.9413	27.0841	26.3706
F14	2098	hsa-miR-223#	30.2207	29.2288	27.6537	28.2337	27.9056	28.6366	26.8734	26.9244	26.5585	27.6776	28.4268	24.8038	28.6084	26.5014	27.5674	28.1007	28.5927	27.0103	28.69	27.4769	Undetermined	29.7637	29.4607	27.4196
F15	2100	hsa-miR-136#	32.7127	32.3762	30.815	31.0694	33.7399	Undetermined	30.0457	33.4214	31.3284	31.4718	35.0214	31.3853	29.9814	26.973	30.9714	30.0744	30.0767	31.4934	26.7572	27.2256	Undetermined	28.3897	30.2095	27.3066
F16	2102	hsa-miR-34b	34.5224	Undetermined	35.6873	Undetermined	32.9868	35.723	Undetermined	32.6922	31.5038	Undetermined	Undetermined	Undetermined	28.0008	24.853	29.0499	28.5119	27.2385	28.4262	28.4977	27.5313	Undetermined	28.705	28.5943	27.7429
F17	2104	hsa-miR-185#	Undetermined	Undetermined	Undetermined	Undetermined	Undetermined	Undetermined	Undetermined	Undetermined	Undetermined	Undetermined	Undetermined	Undetermined	Undetermined	Undetermined	Undetermined	Undetermined	Undetermined	Undetermined	Undetermined	Undetermined	Undetermined	Undetermined	Undetermined	Undetermined
F18	2105	hsa-miR-186#	Undetermined	Undetermined	Undetermined	Undetermined	Undetermined	Undetermined	Undetermined	Undetermined	Undetermined	Undetermined	Undetermined	Undetermined	31.2561	Undetermined	32.6736	34.5391	33.7379	30.3825	31.3488	33.2541	Undetermined	31.2616	Undetermined	29.8598
F19	2107	hsa-miR-195#	Undetermined	Undetermined	Undetermined	Undetermined	Undetermined	Undetermined	Undetermined	Undetermined	Undetermined	Undetermined	Undetermined	Undetermined	Undetermined	Undetermined	Undetermined	Undetermined	Undetermined	Undetermined	Undetermined	Undetermined	Undetermined	Undetermined	Undetermined	Undetermined
F2	1993	hsa-miR-767-5p	Undetermined	Undetermined	Undetermined	Undetermined	Undetermined	Undetermined	Undetermined	Undetermined	Undetermined	Undetermined	Undetermined	Undetermined	Undetermined	Undetermined	Undetermined	Undetermined	Undetermined	Undetermined	Undetermined	Undetermined	Undetermined	Undetermined	Undetermined	Undetermined
F20	2108	hsa-miR-30c-1#	Undetermined	Undetermined	Undetermined	Undetermined	Undetermined	Undetermined	Undetermined	Undetermined	Undetermined	Undetermined	Undetermined	Undetermined	Undetermined	Undetermined	Undetermined	Undetermined	Undetermined	Undetermined	Undetermined	Undetermined	Undetermined	33.8989	Undetermined	32.9017
F21	2110	hsa-miR-30c-2#	Undetermined	Undetermined	Undetermined	Undetermined	Undetermined	Undetermined	Undetermined	Undetermined	Undetermined	Undetermined	Undetermined	Undetermined	Undetermined	Undetermined	Undetermined	30.2758	30.7488	29.2671	28.8619	28.2193	Undetermined	28.1449	28.0768	27.316
F22	2111	hsa-miR-32#	Undetermined	Undetermined	Undetermined	Undetermined	Undetermined	Undetermined	Undetermined	Undetermined	Undetermined	Undetermined	Undetermined	Undetermined	Undetermined	Undetermined	Undetermined	Undetermined	Undetermined	Undetermined	Undetermined	Undetermined	Undetermined	Undetermined	Undetermined	Undetermined
F23	2113	hsa-miR-31#	Undetermined	33.3982	35.4794	34.3312	32.6463	31.1139	32.5983	Undetermined	Undetermined	35.3596	Undetermined	Undetermined	27.135	25.4252	22.6941	27.7827	25.101	Undetermined	23.9338	23.448	Undetermined	23.5586	25.3362	22.1712
F24	2114	hsa-miR-130b#	Undetermined	Undetermined	Undetermined	Undetermined	Undetermined	Undetermined	Undetermined	Undetermined	Undetermined	Undetermined	Undetermined	Undetermined	Undetermined	30.1162	31.2488	31.3971	30.9593	29.4346	31.6844	Undetermined	Undetermined	Undetermined	30.942	29.6218
F3	1995	hsa-miR-767-3p	Undetermined	Undetermined	Undetermined	Undetermined	Undetermined	Undetermined	Undetermined	Undetermined	Undetermined	Undetermined	Undetermined	Undetermined	Undetermined	Undetermined	Undetermined	Undetermined	Undetermined	Undetermined	Undetermined	Undetermined	Undetermined	Undetermined	Undetermined	Undetermined
F4	1996	hsa-miR-454#	38.326	35.7841	33.7801	35.551	32.9017	34.4303	32.7906	Undetermined	33.387	34.0962	35.9684	34.0024	31.2622	29.5935	31.3487	30.4238	30.651	30.0568	30.7066	30.5415	32.7615	31.0701	30.6697	29.7457
F5	1998	hsa-miR-769-5p	32.2998	34.364	30.0225	31.6939	30.3571	31.4479	28.8097	29.4859	28.391	29.1152	31.1335	27.4522	25.3368	24.2204	25.27	25.0008	24.9644	24.8422	24.9829	24.2515	25.9764	24.7985	24.1619	23.7465
F6	2002	hsa-miR-770-5p	Undetermined	Undetermined	Undetermined	Undetermined	Undetermined	Undetermined	Undetermined	Undetermined	Undetermined	Undetermined	Undetermined	Undetermined	Undetermined	Undetermined	Undetermined	Undetermined	Undetermined	Undetermined	Undetermined	Undetermined	Undetermined	Undetermined	Undetermined	Undetermined
F7	2003	hsa-miR-769-3p	Undetermined	Undetermined	Undetermined	Undetermined	Undetermined	Undetermined	Undetermined	Undetermined	Undetermined	Undetermined	Undetermined	Undetermined	Undetermined	Undetermined	Undetermined	Undetermined	34.4643	30.4383	Undetermined	30.8485	Undetermined	31.6588	34.1114	Undetermined
F8	2004	hsa-miR-802	Undetermined	Undetermined	Undetermined	Undetermined	Undetermined	Undetermined	Undetermined	Undetermined	Undetermined	Undetermined	Undetermined	Undetermined	Undetermined	35.3034	34.0571	Undetermined	Undetermined	Undetermined	Undetermined	33.0742	36.0649	35.0795	34.2467	35.2829
F9	2005	hsa-miR-675	Undetermined	Undetermined	Undetermined	Undetermined	Undetermined	Undetermined	Undetermined	Undetermined	Undetermined	Undetermined	Undetermined	Undetermined	Undetermined	28.869	Undetermined	Undetermined	Undetermined	Undetermined	Undetermined	30.774	Undetermined	30.8917	Undetermined	28.6399
G1	2115	hsa-miR-26a-2#	Undetermined	Undetermined	34.6097	Undetermined	34.7441	Undetermined	32.2024	Undetermined	33.7815	Undetermined	34.1041	31.9366	30.4597	28.9121	29.7097	29.0352	30.0044	29.3085	32.3848	29.1439	31.2117	28.957	31.4433	28.8722
G10	2128	hsa-miR-377#	Undetermined	Undetermined	Undetermined	Undetermined	Undetermined	Undetermined	Undetermined	Undetermined	Undetermined	Undetermined	Undetermined	Undetermined	Undetermined	Undetermined	Undetermined	Undetermined	Undetermined	Undetermined	Undetermined	31.3277	Undetermined	Undetermined	Undetermined	Undetermined
G11	338	ath-miR159a	Undetermined	Undetermined	Undetermined	Undetermined	Undetermined	Undetermined	Undetermined	Undetermined	Undetermined	34.4885	Undetermined	Undetermined	Undetermined	Undetermined	Undetermined	Undetermined	Undetermined	Undetermined	Undetermined	Undetermined	Undetermined	Undetermined	Undetermined	Undetermined
G12	2129	hsa-miR-30b#	Undetermined	Undetermined	Undetermined	Undetermined	Undetermined	Undetermined	Undetermined	Undetermined	Undetermined	Undetermined	Undetermined	Undetermined	Undetermined	Undetermined	Undetermined	Undetermined	Undetermined	Undetermined	Undetermined	Undetermined	Undetermined	Undetermined	Undetermined	Undetermined
G13	2130	hsa-miR-122#	Undetermined	Undetermined	Undetermined	Undetermined	Undetermined	34.8848	Undetermined	Undetermined	Undetermined	Undetermined	Undetermined	Undetermined	33.9587	Undetermined	Undetermined	31.3638	34.3743	35.4144	Undetermined	Undetermined	Undetermined	Undetermined	Undetermined	Undetermined
G14	2131	hsa-miR-130a#	Undetermined	Undetermined	Undetermined	Undetermined	Undetermined	Undetermined	Undetermined	Undetermined	Undetermined	Undetermined	Undetermined	Undetermined	32.3788	33.8852	33.9092	Undetermined	35.0637	Undetermined	33.1758	33.9813	34.4719	32.0911	32.4055	Undetermined
G15	2132	hsa-miR-132#	Undetermined	Undetermined	Undetermined	Undetermined	Undetermined	Undetermined	Undetermined	Undetermined	Undetermined	Undetermined	Undetermined	37.8526	33.4014	30.5208	33.4481	33.0051	32.5937	36.1636	30.7758	30.8738	Undetermined	33.0802	33.8799	30.9531
G16	2134	hsa-miR-148a#	Undetermined	Undetermined	Undetermined	Undetermined	Undetermined	Undetermined	Undetermined	Undetermined	Undetermined	Undetermined	Undetermined	Undetermined	Undetermined	Undetermined	Undetermined	Undetermined	Undetermined	33.7564	Undetermined	33.0214	Undetermined	33.3527	Undetermined	31.8236
G17	2135	hsa-miR-33a	Undetermined	Undetermined	Undetermined	Undetermined	Undetermined	Undetermined	Undetermined	Undetermined	Undetermined	Undetermined	Undetermined	Undetermined	Undetermined	Undetermined	Undetermined	Undetermined	Undetermined	Undetermined	Undetermined	Undetermined	Undetermined	Undetermined	Undetermined	Undetermined
G18	2136	hsa-miR-33a#	Undetermined	Undetermined	Undetermined	Undetermined	33.5053	Undetermined	34.842	Undetermined	34.9795	35.574	Undetermined	32.0066	30.8202	28.5787	30.6494	29.6822	30.0359	29.4189	28.4609	29.0062	32.1915	29.0245	28.7367	27.3422
G19	2137	hsa-miR-92a-1#	34.6014	Undetermined	Undetermined	Undetermined	34.3286	Undetermined	33.9913	Undetermined	Undetermined	Undetermined	Undetermined	34.3123	30.0849	28.9177	29.6818	28.8501	29.0485	30.2202	29.0863	29.5125	32.8872	29.0571	28.2159	28.7968
G2	2116	hsa-miR-361-3p	Undetermined	Undetermined	Undetermined	Undetermined	Undetermined	Undetermined	Undetermined	Undetermined	Undetermined	Undetermined	Undetermined	Undetermined	28.8985	27.1085	30.4426	29.335	30.1617	28.259	30.7791	28.8047	33.587	29.7588	29.4918	27.9057
G20	2138	hsa-miR-92a-2#	Undetermined	Undetermined	Undetermined	Undetermined	Undetermined	Undetermined	Undetermined	Undetermined	Undetermined	Undetermined	Undetermined	Undetermined	Undetermined	Undetermined	Undetermined	Undetermined	Undetermined	Undetermined	Undetermined	Undetermined	Undetermined	Undetermined	Undetermined	Undetermined
G21	2139	hsa-miR-93#	29.4822	28.9925	29.9193	30.1503	28.1625	29.4194	26.9665	28.8171	28.2637	28.3348	30.4312	27.3887	26.9643	25.1429	26.1949	25.6498	25.4924	25.7655	26.1322	25.5255	27.655	25.9797	25.7639	25.1951
G22	2140	hsa-miR-96#	Undetermined	Undetermined	Undetermined	Undetermined	Undetermined	Undetermined	Undetermined	Undetermined	Undetermined	Undetermined	Undetermined	Undetermined	Undetermined	Undetermined	Undetermined	Undetermined	Undetermined	Undetermined	Undetermined	Undetermined	Undetermined	Undetermined	Undetermined	Undetermined
G23	2141	hsa-miR-99a#	Undetermined	38.9531	Undetermined	Undetermined	38.1168	Undetermined	Undetermined	Undetermined	Undetermined	Undetermined	Undetermined	36.2052	27.9455	27.3042	26.1556	26.7026	25.9271	25.116	25.6923	25.3773	27.3083	25.1294	25.7527	24.5349
G24	2142	hsa-miR-100#	Undetermined	Undetermined	Undetermined	Undetermined	Undetermined	Undetermined	Undetermined	Undetermined	Undetermined	Undetermined	Undetermined	Undetermined	30.6827	28.1831	29.9815	30.5649	30.3786	Undetermined	29.0648	30.1741	29.7641	29.4992	28.6497	28.7939
G3	2118	hsa-let-7g#	Undetermined	Undetermined	Undetermined	36.2688	Undetermined	Undetermined	Undetermined	Undetermined	Undetermined	Undetermined	Undetermined	Undetermined	Undetermined	33.1281	33.9185	Undetermined	33.0629	31.0853	30.5889	31.9703	31.8562	30.8671	30.1517	29.6192
G4	2119	hsa-miR-302b#	Undetermined	Undetermined	Undetermined	Undetermined	Undetermined	Undetermined	Undetermined	Undetermined	Undetermined	Undetermined	Undetermined	Undetermined	Undetermined	Undetermined	Undetermined	Undetermined	Undetermined	Undetermined	Undetermined	Undetermined	Undetermined	Undetermined	Undetermined	Undetermined
G5	2120	hsa-miR-302d#	Undetermined	Undetermined	Undetermined	Undetermined	Undetermined	Undetermined	Undetermined	Undetermined	Undetermined	Undetermined	Undetermined	Undetermined	Undetermined	Undetermined	Undetermined	Undetermined	Undetermined	Undetermined	Undetermined	Undetermined	Undetermined	Undetermined	Undetermined	Undetermined
G6	2121	hsa-miR-367#	Undetermined	Undetermined	Undetermined	Undetermined	Undetermined	Undetermined	Undetermined	Undetermined	Undetermined	Undetermined	Undetermined	Undetermined	Undetermined	Undetermined	Undetermined	Undetermined	Undetermined	Undetermined	Undetermined	Undetermined	Undetermined	Undetermined	Undetermined	Undetermined
G7	2125	hsa-miR-374a#	Undetermined	34.6169	34.8614	Undetermined	Undetermined	Undetermined	33.5371	Undetermined	Undetermined	Undetermined	Undetermined	Undetermined	29.9832	29.1123	31.9482	29.8406	31.405	29.254	32.2324	30.4632	32.2261	32.6806	33.4154	30.6235
G8	2126	hsa-miR-23b#	Undetermined	Undetermined	Undetermined	Undetermined	Undetermined	Undetermined	Undetermined	Undetermined	Undetermined	Undetermined	Undetermined	Undetermined	Undetermined	Undetermined	Undetermined	Undetermined	Undetermined	Undetermined	Undetermined	32.2791	Undetermined	Undetermined	Undetermined	Undetermined
G9	2127	hsa-miR-376a#	Undetermined	35.952	Undetermined	34.7466	Undetermined	Undetermined	Undetermined	Undetermined	Undetermined	34.6572	Undetermined	Undetermined	Undetermined	30.4986	Undetermined	34.0061	Undetermined	33.0173	32.0377	30.7385	34.1485	33.2327	32.7587	33.2371
H1	2143	hsa-miR-101#	Undetermined	Undetermined	Undetermined	Undetermined	Undetermined	Undetermined	Undetermined	Undetermined	Undetermined	Undetermined	Undetermined	Undetermined	32.7938	Undetermined	Undetermined	32.9098	Undetermined	32.2916	Undetermined	Undetermined	Undetermined	Undetermined	Undetermined	32.48
H10	2154	hsa-miR-924	Undetermined	Undetermined	Undetermined	Undetermined	36.1263	Undetermined	Undetermined	Undetermined	Undetermined	Undetermined	Undetermined	Undetermined	Undetermined	Undetermined	Undetermined	Undetermined	Undetermined	36.4914	Undetermined	Undetermined	Undetermined	Undetermined	Undetermined	Undetermined
H11	2157	hsa-miR-337-3p	Undetermined	Undetermined	35.1698	Undetermined	34.5817	Undetermined	32.7469	Undetermined	33.2578	Undetermined	Undetermined	Undetermined	33.8505	31.9897	36.1268	34.5374	34.4013	Undetermined	31.8613	31.4101	Undetermined	31.8104	32.3996	31.9919
H12	2158	hsa-miR-125b-2#	Undetermined	Undetermined	Undetermined	Undetermined	Undetermined	Undetermined	Undetermined	Undetermined	Undetermined	Undetermined	Undetermined	Undetermined	30.8609	32.0956	28.9682	29.8555	27.0902	26.8896	28.8651	29.63	Undetermined	29.6116	28.2806	27.2152
H13	2159	hsa-miR-135b#	Undetermined	Undetermined	Undetermined	Undetermined	Undetermined	Undetermined	Undetermined	Undetermined	Undetermined	Undetermined	Undetermined	Undetermined	30.4575	31.2576	30.4608	31.0898	28.8981	28.6585	27.6996	27.3813	31.0712	28.9771	28.9951	27.9158
H14	2160	hsa-miR-148b#	32.5038	31.8676	30.4636	31.2792	30.6526	Undetermined	29.3465	32.2706	30.6022	32.029	32.6843	30.6517	27.7072	26.0324	26.623	26.6422	27.1532	26.6765	26.9213	26.4174	28.7298	27.1571	26.966	25.8693
H15	2163	hsa-miR-146a#	Undetermined	Undetermined	Undetermined	Undetermined	Undetermined	Undetermined	Undetermined	Undetermined	Undetermined	Undetermined	Undetermined	Undetermined	Undetermined	Undetermined	Undetermined	Undetermined	Undetermined	Undetermined	Undetermined	Undetermined	Undetermined	Undetermined	Undetermined	35.1116
H16	2164	hsa-miR-149#	Undetermined	Undetermined	Undetermined	Undetermined	Undetermined	Undetermined	Undetermined	Undetermined	Undetermined	Undetermined	Undetermined	Undetermined	Undetermined	Undetermined	Undetermined	Undetermined	Undetermined	Undetermined	Undetermined	Undetermined	Undetermined	Undetermined	Undetermined	Undetermined
H17	2165	hsa-miR-29b-1#	Undetermined	Undetermined	Undetermined	Undetermined	Undetermined	Undetermined	Undetermined	Undetermined	Undetermined	Undetermined	Undetermined	Undetermined	Undetermined	31.603	Undetermined	31.2495	30.6951	Undetermined	30.4462	31.2634	Undetermined	32.7655	33.1808	Undetermined
H18	2166	hsa-miR-29b-2#	Undetermined	Undetermined	Undetermined	Undetermined	Undetermined	Undetermined	Undetermined	Undetermined	Undetermined	Undetermined	35.1167	Undetermined	28.2896	29.0987	28.8922	28.1476	28.056	27.6789	27.2583	27.046	29.2716	27.6503	26.606	26.5001
H19	2168	hsa-miR-105#	Undetermined	Undetermined	Undetermined	Undetermined	Undetermined	Undetermined	Undetermined	Undetermined	Undetermined	Undetermined	Undetermined	Undetermined	Undetermined	Undetermined	Undetermined	Undetermined	Undetermined	Undetermined	Undetermined	Undetermined	Undetermined	Undetermined	Undetermined	Undetermined
H2	2144	hsa-miR-138-2#	Undetermined	Undetermined	Undetermined	Undetermined	Undetermined	Undetermined	Undetermined	Undetermined	Undetermined	Undetermined	Undetermined	Undetermined	Undetermined	Undetermined	Undetermined	Undetermined	Undetermined	Undetermined	Undetermined	Undetermined	Undetermined	Undetermined	Undetermined	Undetermined
H20	2170	hsa-miR-106a#	Undetermined	Undetermined	Undetermined	Undetermined	Undetermined	Undetermined	Undetermined	Undetermined	Undetermined	Undetermined	Undetermined	Undetermined	Undetermined	Undetermined	Undetermined	Undetermined	Undetermined	Undetermined	Undetermined	Undetermined	Undetermined	Undetermined	33.9974	Undetermined
H21	2171	hsa-miR-16-2#	Undetermined	Undetermined	Undetermined	Undetermined	Undetermined	Undetermined	Undetermined	Undetermined	Undetermined	Undetermined	Undetermined	Undetermined	Undetermined	Undetermined	Undetermined	Undetermined	Undetermined	Undetermined	Undetermined	Undetermined	Undetermined	Undetermined	Undetermined	Undetermined
H22	2172	hsa-let-7i#	Undetermined	37.2349	Undetermined	Undetermined	Undetermined	Undetermined	Undetermined	Undetermined	Undetermined	Undetermined	Undetermined	37.1212	28.4655	28.0143	28.7888	28.4581	29.0899	27.7861	28.6326	28.8508	31.766	29.2327	30.1141	27.8483
H23	2173	hsa-miR-15b#	Undetermined	Undetermined	Undetermined	Undetermined	Undetermined	Undetermined	Undetermined	Undetermined	Undetermined	Undetermined	Undetermined	Undetermined	28.7406	26.1092	28.1567	26.8503	28.5009	26.635	30.1932	Undetermined	Undetermined	30.0922	Undetermined	27.2737
H24	2174	hsa-miR-27b#	Undetermined	32.6629	Undetermined	Undetermined	34.3398	Undetermined	Undetermined	Undetermined	35.546	Undetermined	35.2465	Undetermined	27.0462	27.2144	27.8506	27.0465	26.628	26.9585	26.169	26.1046	27.9511	26.0741	25.7741	25.2479
H3	2145	hsa-miR-141#	Undetermined	Undetermined	Undetermined	Undetermined	Undetermined	Undetermined	Undetermined	Undetermined	Undetermined	Undetermined	Undetermined	Undetermined	Undetermined	36.8908	Undetermined	33.1344	Undetermined	Undetermined	30.935	31.809	34.0268	31.6426	36.2196	30.1733
H4	2146	hsa-miR-143#	Undetermined	Undetermined	Undetermined	Undetermined	Undetermined	Undetermined	Undetermined	Undetermined	Undetermined	Undetermined	Undetermined	Undetermined	Undetermined	Undetermined	Undetermined	Undetermined	Undetermined	Undetermined	Undetermined	Undetermined	Undetermined	Undetermined	Undetermined	Undetermined
H5	2148	hsa-miR-144#	29.0048	26.8607	26.834	27.598	26.211	26.2919	24.916	28.3377	26.0866	25.7669	26.3771	24.8962	25.3241	23.7446	23.926	24.2323	24.9464	23.6092	26.8541	26.0788	25.278	25.8021	26.7687	21.7301
H6	2149	hsa-miR-145#	34.9737	32.3449	32.8861	32.3868	31.5291	34.1864	32.5501	33.3605	32.4229	31.6788	33.2062	30.0573	25.7994	23.5612	24.4297	23.5941	23.1592	24.1451	24.6401	23.4894	25.9347	23.9536	24.6799	23.005
H7	2150	hsa-miR-920	Undetermined	Undetermined	Undetermined	Undetermined	Undetermined	Undetermined	Undetermined	Undetermined	Undetermined	Undetermined	Undetermined	Undetermined	Undetermined	Undetermined	Undetermined	Undetermined	Undetermined	Undetermined	Undetermined	Undetermined	Undetermined	Undetermined	Undetermined	Undetermined
H8	2151	hsa-miR-921	Undetermined	Undetermined	Undetermined	Undetermined	Undetermined	Undetermined	Undetermined	Undetermined	Undetermined	Undetermined	Undetermined	Undetermined	Undetermined	Undetermined	Undetermined	Undetermined	Undetermined	Undetermined	Undetermined	Undetermined	Undetermined	Undetermined	Undetermined	Undetermined
H9	2152	hsa-miR-922	Undetermined	Undetermined	Undetermined	Undetermined	Undetermined	Undetermined	Undetermined	Undetermined	Undetermined	Undetermined	Undetermined	Undetermined	34.2502	32.8267	36.0669	Undetermined	Undetermined	33.3947	34.0031	Undetermined	33.4447	32.4119	33.6044	37.1089
I1	2176	hsa-miR-933	Undetermined	Undetermined	Undetermined	Undetermined	Undetermined	Undetermined	Undetermined	Undetermined	Undetermined	Undetermined	Undetermined	Undetermined	Undetermined	Undetermined	Undetermined	Undetermined	Undetermined	Undetermined	Undetermined	Undetermined	Undetermined	Undetermined	Undetermined	Undetermined
I10	2187	hsa-miR-942	31.3368	29.4288	29.4045	30.611	29.8781	30.1064	27.2994	28.9091	28.7357	28.2059	30.5301	27.8421	27.9929	25.2823	27.205	27.7046	27.8777	26.9151	28.4452	Undetermined	30.0731	28.7839	27.6154	26.4297
I11	2188	hsa-miR-943	Undetermined	Undetermined	Undetermined	Undetermined	Undetermined	Undetermined	Undetermined	Undetermined	Undetermined	Undetermined	Undetermined	32.871	Undetermined	Undetermined	Undetermined	Undetermined	Undetermined	Undetermined	Undetermined	Undetermined	Undetermined	Undetermined	Undetermined	Undetermined
I12	2189	hsa-miR-944	Undetermined	Undetermined	37.2863	Undetermined	34.4403	Undetermined	Undetermined	Undetermined	Undetermined	Undetermined	Undetermined	Undetermined	34.4642	30.9828	33.4587	33.2998	Undetermined	32.0127	36.5492	Undetermined	Undetermined	Undetermined	36.8857	32.8105
I13	2196	hsa-miR-99b#	34.367	35.0328	33.5288	Undetermined	32.6093	Undetermined	30.8046	33.0335	32.6988	33.7606	Undetermined	32.4079	28.4554	26.1371	27.6051	26.8219	26.3678	26.9395	26.6319	25.714	27.5027	27.0193	25.6829	25.7396
I14	2197	hsa-miR-124#	Undetermined	Undetermined	Undetermined	Undetermined	Undetermined	Undetermined	Undetermined	Undetermined	Undetermined	Undetermined	Undetermined	Undetermined	Undetermined	Undetermined	Undetermined	Undetermined	Undetermined	Undetermined	Undetermined	Undetermined	Undetermined	Undetermined	Undetermined	Undetermined
I15	2200	hsa-miR-541#	Undetermined	Undetermined	Undetermined	Undetermined	Undetermined	Undetermined	Undetermined	Undetermined	Undetermined	Undetermined	Undetermined	34.5356	Undetermined	Undetermined	Undetermined	Undetermined	Undetermined	Undetermined	Undetermined	Undetermined	Undetermined	Undetermined	Undetermined	Undetermined
I16	2203	hsa-miR-875-5p	37.4427	35.3856	35.9799	33.5421	36.7809	35.5384	35.5155	35.1365	35.4973	36.1252	35.8012	34.3759	32.2224	30.9692	32.7441	30.7915	27.3319	28.7423	32.2069	30.4838	33.2484	33.3654	33.5599	30.8186
I17	2213	hsa-miR-888#	Undetermined	Undetermined	Undetermined	Undetermined	Undetermined	Undetermined	Undetermined	Undetermined	Undetermined	Undetermined	Undetermined	Undetermined	Undetermined	Undetermined	Undetermined	Undetermined	Undetermined	Undetermined	Undetermined	Undetermined	Undetermined	Undetermined	Undetermined	Undetermined
I18	2214	hsa-miR-892b	Undetermined	Undetermined	Undetermined	Undetermined	Undetermined	37.7046	Undetermined	Undetermined	Undetermined	Undetermined	Undetermined	Undetermined	Undetermined	29.7295	33.8939	34.1856	Undetermined	34.1281	31.8737	32.5519	31.8799	31.44	32.3188	32.7143
I19	2231	hsa-miR-9#	33.4958	33.2647	32.2654	31.7923	32.4017	34.344	32.2942	32.5331	31.2846	33.7941	32.0842	31.6113	29.0661	Undetermined	26.0046	28.2064	28.967	28.7539	26.8353	26.9711	28.7786	25.8004	28.1273	25.4163
I2	2177	hsa-miR-934	Undetermined	Undetermined	Undetermined	Undetermined	Undetermined	Undetermined	Undetermined	Undetermined	Undetermined	Undetermined	Undetermined	Undetermined	Undetermined	Undetermined	Undetermined	Undetermined	Undetermined	Undetermined	Undetermined	Undetermined	Undetermined	32.8541	38.5133	Undetermined
I20	2238	hsa-miR-411#	37.9471	36.9558	Undetermined	34.366	37.474	Undetermined	Undetermined	Undetermined	Undetermined	Undetermined	Undetermined	Undetermined	Undetermined	Undetermined	Undetermined	36.8492	35.0907	Undetermined	33.705	30.7165	Undetermined	32.4161	Undetermined	33.7343
I21	2243	hsa-miR-378	27.3983	30.9468	31.2943	31.7231	26.8856	30.4285	22.5913	28.7462	28.1924	28.629	29.6715	Undetermined	23.9221	Undetermined	23.65	24.2857	24.2446	23.3785	21.5654	21.9231	23.2247	22.0019	20.62	21.3974
I22	2254	hsa-miR-151-3p	25.4838	24.7511	24.1674	25.603	24.2925	26.2699	22.1559	24.3013	23.054	23.016	24.8928	23.4762	21.5457	Undetermined	21.2917	20.2211	20.7658	20.5746	20.4265	20.1676	21.908	20.4644	19.9659	19.7235
I23	2259	hsa-miR-340#	Undetermined	30.9768	28.9148	29.7057	30.0946	Undetermined	30.7098	32.3803	29.6492	30.6902	30.2553	Undetermined	25.597	Undetermined	25.108	24.9559	25.2962	24.3546	25.569	24.9503	Undetermined	25.6725	25.9838	24.415
I24	2263	hsa-miR-190b	Undetermined	32.5294	33.1762	32.7701	33.004	Undetermined	32.3296	29.7541	31.4554	31.2565	32.9419	29.1768	28.8771	26.9328	27.8878	28.4007	25.8938	26.9596	28.5748	27.9844	29.9879	28.568	26.9555	26.8379
I3	2178	hsa-miR-935	Undetermined	Undetermined	Undetermined	Undetermined	Undetermined	Undetermined	Undetermined	Undetermined	Undetermined	Undetermined	Undetermined	Undetermined	Undetermined	Undetermined	Undetermined	Undetermined	Undetermined	Undetermined	Undetermined	Undetermined	Undetermined	Undetermined	Undetermined	Undetermined
I4	2179	hsa-miR-936	Undetermined	Undetermined	Undetermined	Undetermined	Undetermined	Undetermined	Undetermined	Undetermined	Undetermined	Undetermined	Undetermined	Undetermined	Undetermined	Undetermined	Undetermined	Undetermined	Undetermined	Undetermined	Undetermined	Undetermined	Undetermined	Undetermined	Undetermined	Undetermined
I5	2180	hsa-miR-937	Undetermined	Undetermined	Undetermined	Undetermined	Undetermined	Undetermined	Undetermined	Undetermined	Undetermined	Undetermined	Undetermined	Undetermined	Undetermined	Undetermined	Undetermined	Undetermined	Undetermined	Undetermined	Undetermined	Undetermined	Undetermined	Undetermined	Undetermined	Undetermined
I6	2181	hsa-miR-938	Undetermined	Undetermined	Undetermined	36.7246	34.6381	Undetermined	35.3249	Undetermined	Undetermined	Undetermined	Undetermined	Undetermined	35.1382	33.229	Undetermined	32.4739	33.1058	33.7418	31.6548	33.9544	35.7811	34.0127	32.0897	33.1034
I7	2182	hsa-miR-939	Undetermined	Undetermined	Undetermined	Undetermined	Undetermined	Undetermined	Undetermined	Undetermined	Undetermined	Undetermined	Undetermined	Undetermined	Undetermined	Undetermined	Undetermined	Undetermined	Undetermined	Undetermined	Undetermined	Undetermined	Undetermined	Undetermined	Undetermined	Undetermined
I8	2183	hsa-miR-941	Undetermined	Undetermined	Undetermined	Undetermined	Undetermined	Undetermined	Undetermined	Undetermined	Undetermined	Undetermined	Undetermined	Undetermined	Undetermined	28.8291	Undetermined	29.8531	30.4721	29.8806	31.5627	29.1754	Undetermined	30.8511	27.8037	28.5806
I9	2185	hsa-miR-335#	Undetermined	31.911	32.4941	34.0856	33.4015	Undetermined	30.2712	Undetermined	31.665	33.8596	34.0392	31.6878	30.5797	26.2557	28.0989	27.6902	28.4074	29.1979	26.755	25.5962	28.7328	26.8312	27.028	25.5121
J1	2266	hsa-miR-545#	Undetermined	33.6663	33.4495	36.3683	Undetermined	Undetermined	32.3846	Undetermined	32.1113	Undetermined	Undetermined	Undetermined	Undetermined	Undetermined	32.7125	Undetermined	Undetermined	33.1455	Undetermined	Undetermined	Undetermined	Undetermined	Undetermined	Undetermined
J10	2298	hsa-miR-129#	Undetermined	Undetermined	Undetermined	Undetermined	Undetermined	Undetermined	Undetermined	Undetermined	Undetermined	Undetermined	Undetermined	Undetermined	Undetermined	Undetermined	35.487	Undetermined	Undetermined	36.4487	Undetermined	Undetermined	Undetermined	Undetermined	29.5348	Undetermined
J11	2301	hsa-miR-22#	Undetermined	32.3279	30.719	31.5528	Undetermined	Undetermined	31.9328	Undetermined	29.4319	Undetermined	Undetermined	Undetermined	Undetermined	Undetermined	25.4725	Undetermined	Undetermined	26.1041	Undetermined	Undetermined	Undetermined	Undetermined	Undetermined	Undetermined
J12	2302	hsa-miR-425#	Undetermined	29.7137	28.5028	29.6465	Undetermined	Undetermined	26.8106	Undetermined	27.7022	Undetermined	Undetermined	Undetermined	Undetermined	Undetermined	27.8496	Undetermined	Undetermined	27.9891	Undetermined	Undetermined	Undetermined	Undetermined	27.9054	Undetermined
J13	2305	hsa-miR-30d#	Undetermined	32.5385	33.8352	34.7546	Undetermined	Undetermined	31.1541	Undetermined	31.4751	Undetermined	Undetermined	Undetermined	Undetermined	Undetermined	27.3267	Undetermined	Undetermined	26.8936	Undetermined	Undetermined	Undetermined	Undetermined	27.7086	Undetermined
J14	2307	hsa-let-7a#	Undetermined	Undetermined	Undetermined	Undetermined	Undetermined	Undetermined	Undetermined	Undetermined	Undetermined	Undetermined	Undetermined	Undetermined	Undetermined	Undetermined	32.8815	Undetermined	Undetermined	32.7526	Undetermined	Undetermined	Undetermined	Undetermined	Undetermined	Undetermined
J15	2309	hsa-miR-424#	Undetermined	Undetermined	Undetermined	Undetermined	Undetermined	Undetermined	31.6082	Undetermined	Undetermined	Undetermined	Undetermined	Undetermined	Undetermined	Undetermined	25.6631	Undetermined	Undetermined	28.2506	Undetermined	Undetermined	Undetermined	Undetermined	Undetermined	Undetermined
J16	2310	hsa-miR-18b#	Undetermined	Undetermined	Undetermined	Undetermined	Undetermined	Undetermined	Undetermined	Undetermined	Undetermined	Undetermined	Undetermined	Undetermined	Undetermined	Undetermined	Undetermined	Undetermined	Undetermined	Undetermined	Undetermined	Undetermined	Undetermined	Undetermined	Undetermined	Undetermined
J17	2311	hsa-miR-20b#	Undetermined	38.7239	Undetermined	Undetermined	Undetermined	Undetermined	Undetermined	Undetermined	Undetermined	Undetermined	Undetermined	Undetermined	Undetermined	Undetermined	34.0481	Undetermined	Undetermined	Undetermined	Undetermined	Undetermined	Undetermined	Undetermined	25.7101	Undetermined
J18	2312	hsa-miR-431#	Undetermined	Undetermined	Undetermined	Undetermined	Undetermined	Undetermined	Undetermined	Undetermined	Undetermined	Undetermined	Undetermined	Undetermined	Undetermined	Undetermined	Undetermined	Undetermined	Undetermined	Undetermined	Undetermined	Undetermined	Undetermined	Undetermined	33.0103	Undetermined
J19	2314	hsa-miR-7-2#	Undetermined	Undetermined	Undetermined	Undetermined	Undetermined	Undetermined	Undetermined	Undetermined	Undetermined	Undetermined	Undetermined	Undetermined	Undetermined	Undetermined	Undetermined	Undetermined	Undetermined	35.8407	Undetermined	Undetermined	Undetermined	Undetermined	31.5557	Undetermined
J2	2270	hsa-miR-183#	Undetermined	30.5273	33.4988	32.151	Undetermined	Undetermined	30.1242	Undetermined	31.4314	Undetermined	Undetermined	Undetermined	Undetermined	Undetermined	28.3841	Undetermined	Undetermined	30.7966	Undetermined	Undetermined	Undetermined	Undetermined	39.1849	Undetermined
J20	2315	hsa-miR-10b#	Undetermined	30.9609	30.1999	32.3241	Undetermined	Undetermined	Undetermined	Undetermined	30.6172	Undetermined	Undetermined	Undetermined	Undetermined	Undetermined	23.177	Undetermined	Undetermined	21.1001	Undetermined	Undetermined	Undetermined	Undetermined	Undetermined	Undetermined
J21	2316	hsa-miR-34a#	Undetermined	33.2281	33.4862	34.233	Undetermined	Undetermined	Undetermined	Undetermined	Undetermined	Undetermined	Undetermined	Undetermined	Undetermined	Undetermined	22.6068	Undetermined	Undetermined	22.494	Undetermined	Undetermined	Undetermined	Undetermined	Undetermined	Undetermined
J22	2317	hsa-miR-181a-2#	Undetermined	32.9236	32.0235	Undetermined	Undetermined	Undetermined	Undetermined	Undetermined	Undetermined	Undetermined	Undetermined	Undetermined	Undetermined	Undetermined	25.0014	Undetermined	Undetermined	24.6392	Undetermined	Undetermined	Undetermined	Undetermined	22.442	Undetermined
J23	2325	hsa-miR-744#	Undetermined	35.9937	32.3016	38.5764	Undetermined	Undetermined	Undetermined	Undetermined	Undetermined	Undetermined	Undetermined	Undetermined	Undetermined	Undetermined	29.0324	Undetermined	Undetermined	28.5141	Undetermined	Undetermined	Undetermined	Undetermined	28.9196	Undetermined
J24	2330	hsa-miR-452#	Undetermined	Undetermined	Undetermined	Undetermined	Undetermined	Undetermined	Undetermined	Undetermined	Undetermined	Undetermined	Undetermined	Undetermined	Undetermined	Undetermined	Undetermined	Undetermined	Undetermined	Undetermined	Undetermined	Undetermined	Undetermined	Undetermined	28.4818	Undetermined
J3	2272	hsa-miR-192#	Undetermined	33.7655	Undetermined	Undetermined	Undetermined	Undetermined	Undetermined	Undetermined	33.6352	Undetermined	Undetermined	Undetermined	Undetermined	Undetermined	26.1937	Undetermined	Undetermined	25.8396	Undetermined	Undetermined	Undetermined	Undetermined	31.2061	Undetermined
J4	2274	hsa-miR-200b#	Undetermined	Undetermined	Undetermined	Undetermined	Undetermined	Undetermined	Undetermined	Undetermined	Undetermined	Undetermined	Undetermined	Undetermined	Undetermined	Undetermined	Undetermined	Undetermined	Undetermined	30.3913	Undetermined	Undetermined	Undetermined	Undetermined	35.5619	Undetermined
J5	2286	hsa-miR-200c#	Undetermined	Undetermined	Undetermined	Undetermined	Undetermined	Undetermined	Undetermined	Undetermined	Undetermined	Undetermined	Undetermined	Undetermined	Undetermined	Undetermined	Undetermined	Undetermined	Undetermined	Undetermined	Undetermined	Undetermined	Undetermined	Undetermined	31.1426	Undetermined
J6	2287	hsa-miR-155#	Undetermined	Undetermined	Undetermined	Undetermined	Undetermined	Undetermined	Undetermined	Undetermined	Undetermined	Undetermined	Undetermined	Undetermined	Undetermined	Undetermined	32.0091	Undetermined	Undetermined	Undetermined	Undetermined	Undetermined	Undetermined	Undetermined	Undetermined	Undetermined
J7	2288	hsa-miR-10a#	Undetermined	Undetermined	Undetermined	Undetermined	Undetermined	Undetermined	Undetermined	Undetermined	Undetermined	Undetermined	Undetermined	Undetermined	Undetermined	Undetermined	29.3784	Undetermined	Undetermined	30.1211	Undetermined	Undetermined	Undetermined	Undetermined	Undetermined	Undetermined
J8	2293	hsa-miR-214#	Undetermined	34.4457	34.1566	36.906	Undetermined	Undetermined	38.1077	Undetermined	Undetermined	Undetermined	Undetermined	Undetermined	Undetermined	Undetermined	26.0749	Undetermined	Undetermined	29.6931	Undetermined	Undetermined	Undetermined	Undetermined	33.4351	Undetermined
J9	2294	hsa-miR-218-2#	Undetermined	Undetermined	Undetermined	Undetermined	Undetermined	Undetermined	Undetermined	Undetermined	Undetermined	Undetermined	Undetermined	Undetermined	Undetermined	Undetermined	32.8735	Undetermined	Undetermined	39.2546	Undetermined	Undetermined	Undetermined	Undetermined	27.7001	Undetermined
K1	2332	hsa-miR-409-3p	25.9289	24.8901	24.562	24.8271	27.5983	28.5797	22.1862	26.2126	25.3608	25.0355	28.7723	25.4263	24.1361	20.8475	24.7015	23.6197	22.586	25.9825	20.1104	19.8511	24.6265	22.9589	22.5227	22.6467
K10	2368	hsa-miR-497#	Undetermined	Undetermined	Undetermined	Undetermined	Undetermined	Undetermined	Undetermined	Undetermined	Undetermined	Undetermined	Undetermined	Undetermined	32.4322	31.1768	32.7085	34.1438	34.3321	31.3675	32.8289	34.7235	Undetermined	Undetermined	Undetermined	34.8557
K11	2371	hsa-miR-518e#	Undetermined	Undetermined	Undetermined	Undetermined	Undetermined	Undetermined	Undetermined	Undetermined	Undetermined	Undetermined	Undetermined	Undetermined	Undetermined	Undetermined	Undetermined	Undetermined	Undetermined	Undetermined	Undetermined	Undetermined	Undetermined	Undetermined	Undetermined	Undetermined
K12	2376	hsa-miR-543	36.399	31.396	30.3914	31.5514	34.425	36.5213	30.5933	Undetermined	33.5234	35.2051	37.433	33.7725	30.0517	26.4635	32.4205	30.6685	29.5304	32.1085	27.4197	26.2943	32.1873	29.6124	29.8333	28.1506
K13	2378	hsa-miR-125b-1#	Undetermined	Undetermined	Undetermined	Undetermined	Undetermined	Undetermined	Undetermined	36.4247	Undetermined	Undetermined	Undetermined	35.8649	30.6776	28.0199	30.5056	30.5978	30.2385	31.1552	27.7666	29.2908	31.6412	29.2624	29.3884	29.2045
K14	2379	hsa-miR-194#	Undetermined	Undetermined	Undetermined	Undetermined	Undetermined	Undetermined	Undetermined	Undetermined	Undetermined	Undetermined	Undetermined	Undetermined	Undetermined	Undetermined	Undetermined	Undetermined	29.1338	30.4969	27.8999	28.1888	Undetermined	29.5942	27.8051	27.8037
K15	2380	hsa-miR-106b#	33.1452	32.7972	29.8353	33.0468	31.2292	33.8331	27.5396	Undetermined	28.0728	29.8857	32.4193	27.6498	26.3778	24.2484	26.1051	24.6956	25.309	24.1472	26.0161	25.3114	28.2626	26.8229	25.45	24.9938
K16	2381	hsa-miR-302a#	Undetermined	Undetermined	Undetermined	Undetermined	Undetermined	Undetermined	Undetermined	Undetermined	Undetermined	Undetermined	Undetermined	Undetermined	Undetermined	Undetermined	Undetermined	Undetermined	36.9875	Undetermined	Undetermined	Undetermined	38.1853	35.2512	37.7676	34.1247
K17	2384	hsa-miR-519b-3p	Undetermined	Undetermined	Undetermined	Undetermined	Undetermined	Undetermined	39.0848	Undetermined	Undetermined	Undetermined	37.1373	38.9669	Undetermined	Undetermined	35.7157	Undetermined	34.2229	34.9407	Undetermined	Undetermined	Undetermined	32.6975	37.0992	Undetermined
K18	2387	hsa-miR-518f#	Undetermined	Undetermined	Undetermined	Undetermined	Undetermined	Undetermined	Undetermined	Undetermined	Undetermined	Undetermined	Undetermined	Undetermined	Undetermined	Undetermined	Undetermined	Undetermined	Undetermined	Undetermined	Undetermined	Undetermined	Undetermined	Undetermined	Undetermined	Undetermined
K19	2391	hsa-miR-374b#	Undetermined	Undetermined	Undetermined	Undetermined	Undetermined	Undetermined	Undetermined	Undetermined	Undetermined	Undetermined	Undetermined	Undetermined	33.1515	31.6788	34.0617	31.7602	32.4113	32.2777	32.7027	33.3139	36.1568	33.7389	32.1833	31.7648
K2	2333	hsa-miR-181c#	Undetermined	Undetermined	Undetermined	Undetermined	Undetermined	Undetermined	Undetermined	Undetermined	Undetermined	Undetermined	Undetermined	Undetermined	Undetermined	Undetermined	Undetermined	Undetermined	Undetermined	Undetermined	Undetermined	Undetermined	Undetermined	Undetermined	Undetermined	30.7578
K20	2400	hsa-miR-520c-3p	36.4971	34.9386	34.8993	33.8534	37.5521	34.3046	34.4589	30.9869	33.6072	36.1727	Undetermined	32.2553	31.8428	30.9386	31.6504	32.6813	33.5412	31.084	31.0248	31.9936	33.6073	32.2644	33.0915	32.7979
K21	2404	hsa-let-7b#	Undetermined	Undetermined	Undetermined	Undetermined	Undetermined	Undetermined	Undetermined	Undetermined	Undetermined	Undetermined	Undetermined	Undetermined	Undetermined	Undetermined	Undetermined	Undetermined	Undetermined	Undetermined	Undetermined	Undetermined	Undetermined	Undetermined	Undetermined	Undetermined
K22	2405	hsa-let-7c#	Undetermined	Undetermined	Undetermined	Undetermined	Undetermined	Undetermined	Undetermined	Undetermined	Undetermined	Undetermined	Undetermined	Undetermined	Undetermined	Undetermined	Undetermined	Undetermined	Undetermined	Undetermined	Undetermined	Undetermined	Undetermined	Undetermined	Undetermined	Undetermined
K23	2407	hsa-let-7e#	Undetermined	Undetermined	Undetermined	Undetermined	Undetermined	Undetermined	Undetermined	Undetermined	35.0929	Undetermined	Undetermined	Undetermined	33.4728	33.1255	32.4109	31.8352	31.1289	31.5965	30.754	30.4944	33.2966	30.7079	31.18	30.0358
K24	2410	hsa-miR-550	Undetermined	Undetermined	Undetermined	35.0532	35.0917	Undetermined	36.2647	33.4686	33.5698	35.146	36.6806	32.8686	Undetermined	32.2067	33.6889	33.1723	31.7051	32.3179	33.2082	31.5864	Undetermined	35.9947	33.0634	31.8832
K3	2336	hsa-miR-196a#	Undetermined	Undetermined	Undetermined	Undetermined	Undetermined	Undetermined	Undetermined	Undetermined	Undetermined	Undetermined	Undetermined	Undetermined	33.2183	33.607	33.0209	33.6421	37.8518	35.3009	31.3941	32.5828	32.9383	32.2413	36.1031	33.5816
K4	2339	hsa-miR-483-3p	Undetermined	Undetermined	Undetermined	Undetermined	30.5198	Undetermined	Undetermined	Undetermined	Undetermined	Undetermined	Undetermined	Undetermined	Undetermined	28.3256	Undetermined	Undetermined	Undetermined	Undetermined	Undetermined	28.5499	Undetermined	27.1881	Undetermined	27.7358
K5	2342	hsa-miR-708#	Undetermined	Undetermined	Undetermined	Undetermined	Undetermined	Undetermined	Undetermined	Undetermined	Undetermined	Undetermined	Undetermined	Undetermined	Undetermined	Undetermined	Undetermined	Undetermined	Undetermined	Undetermined	Undetermined	Undetermined	Undetermined	Undetermined	Undetermined	Undetermined
K6	2343	hsa-miR-92b#	Undetermined	Undetermined	Undetermined	Undetermined	Undetermined	Undetermined	Undetermined	Undetermined	Undetermined	Undetermined	Undetermined	Undetermined	Undetermined	Undetermined	Undetermined	Undetermined	Undetermined	Undetermined	Undetermined	Undetermined	Undetermined	Undetermined	Undetermined	Undetermined
K7	2346	hsa-miR-551b#	Undetermined	Undetermined	Undetermined	Undetermined	Undetermined	Undetermined	Undetermined	Undetermined	Undetermined	Undetermined	Undetermined	Undetermined	36.0401	32.9464	35.3287	33.7655	34.3384	Undetermined	33.0921	31.4783	35.2051	35.9836	33.7138	31.4941
K8	2362	hsa-miR-202#	Undetermined	Undetermined	Undetermined	Undetermined	Undetermined	Undetermined	Undetermined	Undetermined	Undetermined	Undetermined	Undetermined	Undetermined	35.0826	Undetermined	Undetermined	36.2913	Undetermined	Undetermined	33.3967	34.1655	Undetermined	Undetermined	Undetermined	36.5985
K9	2366	hsa-miR-193b#	Undetermined	Undetermined	Undetermined	Undetermined	Undetermined	Undetermined	Undetermined	Undetermined	Undetermined	Undetermined	Undetermined	Undetermined	Undetermined	29.7586	Undetermined	30.6386	31.0083	Undetermined	30.0634	30.0017	31.8999	29.621	27.7821	29.3662
L1	2411	hsa-miR-593	Undetermined	Undetermined	Undetermined	Undetermined	Undetermined	Undetermined	Undetermined	Undetermined	Undetermined	Undetermined	Undetermined	Undetermined	Undetermined	Undetermined	Undetermined	Undetermined	Undetermined	Undetermined	Undetermined	Undetermined	Undetermined	Undetermined	Undetermined	Undetermined
L10	2432	hsa-miR-625#	29.1906	28.5106	28.268	27.9399	26.8826	28.9751	25.4977	27.5049	25.921	27.6119	27.3367	27.239	26.1126	23.854	25.3484	26.0436	25.5639	25.024	26.1848	24.9193	27.8587	26.4091	25.7931	25.2648
L11	2434	hsa-miR-628-3p	33.6837	32.7391	32.0963	32.6715	31.8431	34.2563	29.3009	31.6062	31.5403	31.6708	32.0402	29.6311	29.6844	28.3111	29.0461	28.9987	28.2659	28.1566	28.1061	28.1469	30.9321	28.4463	27.8871	26.9361
L12	2437	hsa-miR-20a#	32.9872	37.836	31.186	35.206	32.2455	Undetermined	31.2954	Undetermined	30.6943	30.823	33.0548	29.9609	26.0699	26.0439	26.7285	25.7381	26.238	25.786	26.2235	26.7672	27.7178	26.2783	27.2382	24.9124
L13	2438	hsa-miR-21#	Undetermined	Undetermined	Undetermined	Undetermined	Undetermined	Undetermined	Undetermined	Undetermined	Undetermined	Undetermined	Undetermined	Undetermined	25.7663	23.5288	25.4006	26.0987	25.5535	25.9302	24.1871	25.0856	26.111	27.0659	27.0617	25.8965
L14	2439	hsa-miR-23a#	37.2592	Undetermined	Undetermined	Undetermined	38.0207	Undetermined	Undetermined	37.7537	Undetermined	Undetermined	36.2212	34.3279	Undetermined	34.5033	32.6695	Undetermined	34.6514	Undetermined	31.5822	Undetermined	34.7964	Undetermined	Undetermined	Undetermined
L15	2440	hsa-miR-24-1#	Undetermined	Undetermined	Undetermined	Undetermined	Undetermined	Undetermined	Undetermined	Undetermined	Undetermined	Undetermined	Undetermined	Undetermined	30.8677	33.5514	31.8657	33.2908	32.6523	30.9048	30.0614	30.6239	33.6393	32.0103	34.086	30.1635
L16	2441	hsa-miR-24-2#	35.2741	Undetermined	33.3041	Undetermined	34.1838	35.8786	Undetermined	Undetermined	34.5796	33.1622	Undetermined	32.8999	28.0596	25.3727	26.3723	26.4864	26.2967	25.9999	27.451	26.733	30.0158	27.7296	27.2305	26.3003
L17	2442	hsa-miR-25#	Undetermined	Undetermined	Undetermined	Undetermined	Undetermined	Undetermined	Undetermined	Undetermined	Undetermined	Undetermined	Undetermined	Undetermined	Undetermined	Undetermined	Undetermined	Undetermined	Undetermined	Undetermined	Undetermined	Undetermined	Undetermined	Undetermined	Undetermined	Undetermined
L18	2443	hsa-miR-26a-1#	35.7817	35.6797	32.3126	34.2632	33.3817	37.4244	30.7512	37.4494	31.3952	32.1368	34.9873	31.6584	29.9635	29.1087	29.6612	28.1143	29.2254	28.7484	27.3984	27.6078	29.3113	27.3827	27.5623	26.7178
L19	2444	hsa-miR-26b#	34.9688	32.0678	30.8202	32.4099	31.7688	33.2535	29.8419	32.4296	30.0062	32.9297	32.4198	29.3216	27.6977	27.251	28.2271	26.7368	26.5382	26.085	26.1641	26.5351	28.0639	26.3515	26.2939	25.7216
L2	2417	hsa-let-7f-1#	Undetermined	Undetermined	Undetermined	Undetermined	Undetermined	Undetermined	Undetermined	Undetermined	Undetermined	Undetermined	Undetermined	Undetermined	31.4882	Undetermined	Undetermined	32.0934	33.4668	31.9578	32.7495	31.7688	Undetermined	31.1965	32.8484	29.5419
L20	2445	hsa-miR-27a#	35.9871	35.2118	31.6954	32.9926	32.6078	33.5096	30.7888	30.9752	31.3812	31.1501	31.979	28.8097	25.749	24.3242	25.9677	25.5546	23.3883	27.4386	23.2893	26.3142	26.2233	27.2104	25.6838	25.6341
L21	2447	hsa-miR-29a#	Undetermined	Undetermined	32.6955	Undetermined	32.023	Undetermined	Undetermined	Undetermined	Undetermined	Undetermined	Undetermined	33.1729	26.2764	25.155	26.4902	25.7582	26.2848	24.9918	25.207	25.245	26.9883	25.3624	26.3879	24.1871
L22	2642	hsa-miR-151-5P	30.2899	28.9607	27.9776	29.3077	28.6493	29.5508	27.5109	31.2277	27.8712	28.5709	28.9244	Undetermined	23.3531	22.6094	23.3082	22.0964	22.3052	22.5506	22.4818	22.5133	24.7164	22.9379	22.1235	21.9
L23	2643	hsa-miR-765	Undetermined	Undetermined	Undetermined	Undetermined	Undetermined	Undetermined	Undetermined	Undetermined	Undetermined	Undetermined	Undetermined	Undetermined	Undetermined	Undetermined	Undetermined	Undetermined	Undetermined	Undetermined	Undetermined	Undetermined	Undetermined	Undetermined	Undetermined	Undetermined
L24	2658	hsa-miR-338-5P	29.7256	29.2886	28.8172	29.0652	29.9938	29.7532	29.6474	28.0233	28.6588	29.5152	30.0087	Undetermined	28.5633	Undetermined	28.8926	28.9314	28.6144	28.186	28.1715	28.2427	29.631	28.5562	28.1295	28.0921
L3	2418	hsa-let-7f-2#	Undetermined	Undetermined	Undetermined	Undetermined	39.0892	Undetermined	Undetermined	Undetermined	34.602	Undetermined	Undetermined	36.4018	31.0796	30.6247	31.3578	30.1265	30.3497	30.6436	29.6845	29.8044	32.306	29.7112	31.2636	29.2517
L4	2419	hsa-miR-15a#	33.7469	31.3287	31.0933	32.3672	30.9623	32.9193	29.9857	Undetermined	29.9706	30.6177	31.2999	29.3768	27.8069	26.5553	27.9095	27.5618	28.8101	27.4815	27.6032	27.823	30.645	27.9618	28.9118	27.1421
L5	2420	hsa-miR-16-1#	33.9984	Undetermined	32.7362	33.5201	31.3345	Undetermined	31.5362	33.0567	31.3516	31.3532	34.9777	30.0171	28.5233	26.8178	28.2069	28.1031	30.3695	27.8351	28.4336	29.0636	32.0446	28.9844	29.4183	27.7544
L6	2421	hsa-miR-17#	Undetermined	Undetermined	37.8911	Undetermined	34.0984	Undetermined	32.8981	Undetermined	Undetermined	33.181	34.4925	Undetermined	27.7995	26.6027	28.3987	28.1188	28.9321	27.2599	27.2982	27.8654	30.5592	27.9769	31.8507	27.0368
L7	2423	hsa-miR-18a#	Undetermined	33.2456	33.3859	36.436	33.8193	33.8533	31.0687	Undetermined	33.598	32.6819	Undetermined	32.9347	29.4027	28.3351	29.5183	29.3798	29.6407	28.2267	28.91	29.4023	31.3946	29.7942	28.9751	28.4896
L8	2424	hsa-miR-19a#	Undetermined	Undetermined	Undetermined	Undetermined	37.2068	Undetermined	Undetermined	Undetermined	34.9448	37.9834	Undetermined	Undetermined	35.767	36.7521	Undetermined	34.1654	Undetermined	31.8878	Undetermined	Undetermined	Undetermined	Undetermined	Undetermined	Undetermined
L9	2425	hsa-miR-19b-1#	32.4552	31.8182	30.4639	31.9954	31.7272	33.2035	30.7611	31.7809	31.4268	32.6407	33.1848	30.7097	28.0804	27.4689	28.1958	27.3944	27.3301	27.4489	27.1931	27.8464	28.6625	27.2295	27.2815	26.3306
M1	2672	hsa-miR-620	Undetermined	Undetermined	Undetermined	Undetermined	Undetermined	Undetermined	Undetermined	Undetermined	Undetermined	Undetermined	Undetermined	Undetermined	Undetermined	Undetermined	Undetermined	Undetermined	Undetermined	Undetermined	Undetermined	Undetermined	Undetermined	Undetermined	Undetermined	Undetermined
M10	2756	hsa-miR-513C	Undetermined	Undetermined	Undetermined	Undetermined	Undetermined	Undetermined	Undetermined	Undetermined	Undetermined	Undetermined	Undetermined	Undetermined	Undetermined	Undetermined	Undetermined	Undetermined	Undetermined	Undetermined	Undetermined	30.7353	Undetermined	Undetermined	Undetermined	Undetermined
M11	2757	hsa-miR-513B	Undetermined	Undetermined	Undetermined	Undetermined	Undetermined	Undetermined	Undetermined	Undetermined	Undetermined	Undetermined	Undetermined	Undetermined	Undetermined	Undetermined	Undetermined	Undetermined	Undetermined	Undetermined	Undetermined	32.7038	Undetermined	Undetermined	Undetermined	Undetermined
M12	2758	hsa-miR-1226#	Undetermined	Undetermined	Undetermined	Undetermined	Undetermined	Undetermined	Undetermined	Undetermined	Undetermined	Undetermined	Undetermined	Undetermined	Undetermined	Undetermined	Undetermined	Undetermined	Undetermined	Undetermined	Undetermined	31.9103	Undetermined	Undetermined	30.454	Undetermined
M13	2761	hsa-miR-1236	Undetermined	Undetermined	Undetermined	Undetermined	Undetermined	Undetermined	Undetermined	Undetermined	Undetermined	Undetermined	Undetermined	Undetermined	Undetermined	Undetermined	Undetermined	Undetermined	Undetermined	Undetermined	Undetermined	Undetermined	Undetermined	Undetermined	Undetermined	Undetermined
M14	2763	hsa-miR-1228#	Undetermined	Undetermined	Undetermined	Undetermined	Undetermined	Undetermined	Undetermined	Undetermined	Undetermined	Undetermined	Undetermined	Undetermined	Undetermined	Undetermined	Undetermined	Undetermined	Undetermined	Undetermined	Undetermined	Undetermined	Undetermined	Undetermined	Undetermined	Undetermined
M15	2766	hsa-miR-1225-3P	Undetermined	Undetermined	Undetermined	Undetermined	Undetermined	Undetermined	Undetermined	Undetermined	Undetermined	Undetermined	Undetermined	Undetermined	Undetermined	Undetermined	Undetermined	Undetermined	Undetermined	Undetermined	Undetermined	Undetermined	Undetermined	Undetermined	Undetermined	Undetermined
M16	2768	hsa-miR-1233	30.0079	Undetermined	Undetermined	30.4688	30.9554	Undetermined	27.2986	28.1028	30.5083	28.6823	28.5731	23.8875	24.8063	24.6881	27.0995	25.8373	26.9191	25.9891	25.3428	26.8759	27.351	26.9133	26.8678	25.6171
M17	2769	hsa-miR-1227	32.0129	35.3544	31.7892	32.3523	33.2001	33.9634	30.5917	30.4098	32.8208	31.6231	32.5403	28.3764	30.0004	29.2769	30.3726	29.369	29.6379	29.3989	28.7797	28.8661	29.8558	29.8141	27.8418	28.0398
M18	2773	hsa-miR-1286	Undetermined	Undetermined	Undetermined	Undetermined	Undetermined	Undetermined	Undetermined	Undetermined	Undetermined	Undetermined	Undetermined	Undetermined	Undetermined	Undetermined	Undetermined	Undetermined	Undetermined	Undetermined	Undetermined	Undetermined	Undetermined	Undetermined	Undetermined	Undetermined
M19	2775	hsa-miR-548M	Undetermined	Undetermined	Undetermined	Undetermined	Undetermined	Undetermined	Undetermined	Undetermined	Undetermined	Undetermined	Undetermined	Undetermined	Undetermined	Undetermined	Undetermined	Undetermined	Undetermined	Undetermined	Undetermined	Undetermined	Undetermined	Undetermined	Undetermined	Undetermined
M2	2675	hsa-miR-577	32.814	34.4067	Undetermined	Undetermined	Undetermined	Undetermined	Undetermined	Undetermined	Undetermined	Undetermined	Undetermined	Undetermined	25.9382	28.854	26.4873	25.9355	26.4212	25.5812	25.8845	26.3502	26.9925	24.6833	25.7408	23.9398
M20	2776	hsa-miR-1179	38.48	Undetermined	38.2778	Undetermined	38.2029	Undetermined	Undetermined	Undetermined	38.7988	35.9854	35.0926	Undetermined	33.7483	31.73	35.2559	33.2119	Undetermined	33.6865	34.5414	33.5506	34.4502	33.1297	33.023	32.1054
M21	2777	hsa-miR-1178	Undetermined	Undetermined	Undetermined	Undetermined	Undetermined	Undetermined	Undetermined	Undetermined	Undetermined	Undetermined	Undetermined	Undetermined	Undetermined	Undetermined	Undetermined	Undetermined	Undetermined	Undetermined	Undetermined	Undetermined	Undetermined	Undetermined	Undetermined	Undetermined
M22	2778	hsa-miR-1205	Undetermined	Undetermined	Undetermined	Undetermined	Undetermined	Undetermined	Undetermined	Undetermined	Undetermined	Undetermined	Undetermined	Undetermined	Undetermined	Undetermined	Undetermined	Undetermined	Undetermined	Undetermined	Undetermined	Undetermined	Undetermined	Undetermined	Undetermined	Undetermined
M23	2779	hsa-miR-1271	33.0139	33.9922	32.5353	34.0718	32.3812	34.9999	30.8028	35.1859	32.767	31.9917	Undetermined	33.3425	25.7912	24.9034	25.644	25.0405	25.6187	24.7217	26.5492	25.9945	28.9117	26.9449	25.8905	25.6042
M24	2781	hsa-miR-1201	Undetermined	Undetermined	35.3313	Undetermined	Undetermined	Undetermined	Undetermined	Undetermined	36.2155	Undetermined	Undetermined	Undetermined	26.5221	26.2399	26.7805	25.893	25.6839	25.8268	25.2719	25.5423	26.635	25.6517	24.4029	24.9944
M3	2676	hsa-miR-144	29.6087	29.6668	30.7661	33.0531	29.9213	29.7591	26.9214	30.3429	30.4256	28.4877	30.5276	29.2454	30.2232	31.1766	30.7049	32.8549	33.7915	28.5773	35.2768	32.0962	33.1351	34.3285	Undetermined	28.3255
M4	2677	hsa-miR-590-3P	32.6848	30.4044	29.1125	30.5405	28.9491	30.5156	28.8571	31.2366	28.8874	30.0522	30.4496	27.8653	25.2414	24.1653	25.6156	24.9879	26.4397	23.7625	26.8025	26.5149	28.3837	26.1815	27.0883	24.4355
M5	2678	hsa-miR-191#	35.0457	32.5973	33.7292	34.127	33.0235	34.175	30.1136	32.3271	31.1962	31.9136	33.0369	30.9394	31.6454	29.8827	31.6791	30.1837	30.1505	30.8873	29.1542	29.1486	Undetermined	28.6212	27.9611	28.5919
M6	2681	hsa-miR-665	Undetermined	Undetermined	Undetermined	Undetermined	Undetermined	Undetermined	Undetermined	Undetermined	Undetermined	Undetermined	Undetermined	Undetermined	Undetermined	Undetermined	Undetermined	Undetermined	Undetermined	Undetermined	Undetermined	Undetermined	Undetermined	Undetermined	Undetermined	Undetermined
M7	2743	hsa-miR-520D-3P	34.6597	36.0176	Undetermined	36.6766	33.1204	36.2184	Undetermined	Undetermined	33.9841	Undetermined	34.1964	32.7096	30.287	29.9433	31.8205	30.8927	32.2428	30.84	30.2515	31.0966	31.3977	30.7275	29.6834	31.6174
M8	2752	hsa-miR-1224-3P	Undetermined	Undetermined	Undetermined	Undetermined	Undetermined	Undetermined	Undetermined	Undetermined	Undetermined	Undetermined	Undetermined	Undetermined	Undetermined	Undetermined	Undetermined	Undetermined	Undetermined	Undetermined	Undetermined	Undetermined	Undetermined	Undetermined	Undetermined	Undetermined
M9	2867	hsa-miR-1305	33.2118	34.3873	35.2439	32.0701	36.218	33.2036	34.6458	32.0481	34.0588	34.4533	34.3613	Undetermined	33.8542	29.5144	34.2915	33.217	33.158	33.3555	33.8563	31.1266	34.4179	32.7328	33.8795	33.8166
N1	2783	hsa-miR-548J	Undetermined	Undetermined	37.7318	Undetermined	Undetermined	39.5355	38.1009	Undetermined	37.1104	Undetermined	Undetermined	Undetermined	Undetermined	Undetermined	Undetermined	37.7236	37.1042	35.711	Undetermined	Undetermined	38.2172	38.3804	Undetermined	35.3245
N10	2799	hsa-miR-1264	Undetermined	Undetermined	Undetermined	Undetermined	Undetermined	Undetermined	33.8169	Undetermined	Undetermined	Undetermined	Undetermined	Undetermined	Undetermined	Undetermined	Undetermined	Undetermined	Undetermined	Undetermined	Undetermined	Undetermined	Undetermined	Undetermined	Undetermined	Undetermined
N11	2801	hsa-miR-1255B	Undetermined	33.5615	32.4162	Undetermined	32.041	32.4263	30.3349	32.5091	30.8498	31.3021	33.2595	31.591	29.8625	28.1159	29.5968	28.9942	29.5625	29.9977	28.1816	29.5361	29.4979	30.7571	28.6143	28.8375
N12	2803	hsa-miR-1282	Undetermined	Undetermined	Undetermined	Undetermined	Undetermined	Undetermined	Undetermined	Undetermined	Undetermined	Undetermined	Undetermined	Undetermined	33.9018	30.9793	34.5784	32.3426	31.8323	Undetermined	35.5831	33.5135	34.0798	35.3008	33.5057	33.5964
N13	2805	hsa-miR-1255A	Undetermined	Undetermined	Undetermined	Undetermined	Undetermined	Undetermined	Undetermined	Undetermined	Undetermined	Undetermined	Undetermined	Undetermined	Undetermined	Undetermined	Undetermined	Undetermined	Undetermined	Undetermined	Undetermined	Undetermined	Undetermined	Undetermined	Undetermined	Undetermined
N14	2807	hsa-miR-1270	Undetermined	Undetermined	Undetermined	Undetermined	Undetermined	Undetermined	33.397	35.1986	33.9313	Undetermined	Undetermined	Undetermined	29.3421	26.9574	26.5288	26.7332	25.9033	26.3167	30.3744	27.4347	30.0094	28.0018	27.7018	28.4157
N15	2810	hsa-miR-1197	Undetermined	Undetermined	Undetermined	Undetermined	Undetermined	Undetermined	Undetermined	Undetermined	Undetermined	35.8398	Undetermined	Undetermined	Undetermined	Undetermined	Undetermined	Undetermined	Undetermined	Undetermined	Undetermined	Undetermined	Undetermined	Undetermined	Undetermined	Undetermined
N16	2815	hsa-miR-1324	Undetermined	Undetermined	Undetermined	Undetermined	Undetermined	Undetermined	Undetermined	Undetermined	Undetermined	Undetermined	Undetermined	Undetermined	Undetermined	34.1355	Undetermined	Undetermined	Undetermined	Undetermined	Undetermined	Undetermined	Undetermined	Undetermined	Undetermined	Undetermined
N17	2816	hsa-miR-548H	Undetermined	Undetermined	Undetermined	Undetermined	Undetermined	Undetermined	Undetermined	Undetermined	Undetermined	Undetermined	Undetermined	Undetermined	Undetermined	Undetermined	Undetermined	Undetermined	Undetermined	33.5308	Undetermined	Undetermined	Undetermined	Undetermined	Undetermined	Undetermined
N18	2818	hsa-miR-1254	33.7286	Undetermined	Undetermined	Undetermined	33.4653	Undetermined	35.206	Undetermined	35.7507	Undetermined	Undetermined	31.7419	30.374	28.5526	29.1912	29.5718	28.7487	30.541	28.9599	29.5133	29.6863	29.5799	29.9801	30.387
N19	2819	hsa-miR-548K	Undetermined	Undetermined	Undetermined	Undetermined	Undetermined	Undetermined	Undetermined	Undetermined	Undetermined	Undetermined	Undetermined	Undetermined	Undetermined	33.6599	33.2552	33.1992	Undetermined	Undetermined	34.231	34.9567	Undetermined	Undetermined	Undetermined	35.3815
N2	2784	hsa-miR-1263	Undetermined	Undetermined	Undetermined	Undetermined	Undetermined	Undetermined	Undetermined	Undetermined	Undetermined	Undetermined	Undetermined	Undetermined	Undetermined	Undetermined	Undetermined	Undetermined	Undetermined	Undetermined	Undetermined	32.1839	Undetermined	31.3102	30.6067	29.8593
N20	2820	hsa-miR-1251	Undetermined	Undetermined	Undetermined	Undetermined	Undetermined	Undetermined	Undetermined	Undetermined	Undetermined	Undetermined	Undetermined	Undetermined	Undetermined	Undetermined	Undetermined	Undetermined	Undetermined	Undetermined	34.364	Undetermined	Undetermined	Undetermined	Undetermined	31.8504
N21	2822	hsa-miR-1285	37.3924	35.8713	34.7276	37.627	36.8796	36.0252	34.7093	Undetermined	35.6891	33.5533	Undetermined	Undetermined	29.499	28.4459	29.5175	29.4067	29.7485	29.2484	26.072	27.0187	26.8497	26.2453	25.4285	26.1935
N22	2823	hsa-miR-1245	Undetermined	Undetermined	Undetermined	Undetermined	Undetermined	Undetermined	Undetermined	Undetermined	Undetermined	Undetermined	Undetermined	Undetermined	Undetermined	Undetermined	Undetermined	Undetermined	Undetermined	Undetermined	Undetermined	Undetermined	Undetermined	Undetermined	Undetermined	Undetermined
N23	2824	hsa-miR-1292	Undetermined	Undetermined	Undetermined	Undetermined	Undetermined	Undetermined	Undetermined	Undetermined	Undetermined	Undetermined	Undetermined	Undetermined	Undetermined	Undetermined	Undetermined	Undetermined	Undetermined	Undetermined	Undetermined	Undetermined	Undetermined	Undetermined	Undetermined	Undetermined
N24	2827	hsa-miR-1301	Undetermined	Undetermined	Undetermined	Undetermined	Undetermined	Undetermined	Undetermined	Undetermined	Undetermined	Undetermined	Undetermined	Undetermined	Undetermined	Undetermined	Undetermined	Undetermined	Undetermined	Undetermined	Undetermined	Undetermined	Undetermined	Undetermined	Undetermined	Undetermined
N3	2785	hsa-miR-1294	Undetermined	Undetermined	Undetermined	Undetermined	Undetermined	Undetermined	Undetermined	Undetermined	Undetermined	Undetermined	Undetermined	Undetermined	Undetermined	Undetermined	Undetermined	Undetermined	Undetermined	Undetermined	Undetermined	Undetermined	Undetermined	Undetermined	Undetermined	Undetermined
N4	2789	hsa-miR-1269	Undetermined	Undetermined	Undetermined	Undetermined	Undetermined	Undetermined	Undetermined	Undetermined	Undetermined	Undetermined	Undetermined	Undetermined	Undetermined	25.9633	23.0952	Undetermined	Undetermined	Undetermined	29.8592	30.6173	26.7142	27.6522	25.1021	26.6023
N5	2790	hsa-miR-1265	Undetermined	Undetermined	35.7284	Undetermined	Undetermined	Undetermined	Undetermined	Undetermined	Undetermined	Undetermined	Undetermined	Undetermined	Undetermined	Undetermined	Undetermined	Undetermined	Undetermined	Undetermined	Undetermined	Undetermined	Undetermined	Undetermined	Undetermined	Undetermined
N6	2791	hsa-miR-1244	Undetermined	34.1927	Undetermined	Undetermined	Undetermined	Undetermined	33.1986	32.4079	Undetermined	36.1131	Undetermined	33.9886	26.5991	24.5853	25.9767	29.8566	26.4639	25.8518	25.0977	27.9982	25.6426	25.7359	24.7564	25.6976
N7	2792	hsa-miR-1303	Undetermined	Undetermined	Undetermined	Undetermined	34.9339	Undetermined	33.1615	32.3807	31.877	32.2493	32.8933	30.5598	28.5769	28.4763	30.9395	29.3045	30.8772	28.9912	29.3558	30.7618	30.6163	29.4841	29.2894	28.2235
N8	2796	hsa-miR-1259	Undetermined	Undetermined	Undetermined	Undetermined	Undetermined	Undetermined	Undetermined	Undetermined	Undetermined	Undetermined	Undetermined	Undetermined	Undetermined	Undetermined	Undetermined	Undetermined	Undetermined	Undetermined	Undetermined	Undetermined	Undetermined	Undetermined	Undetermined	Undetermined
N9	2798	hsa-miR-548P	Undetermined	Undetermined	Undetermined	Undetermined	Undetermined	Undetermined	Undetermined	Undetermined	Undetermined	Undetermined	Undetermined	36.1826	Undetermined	Undetermined	Undetermined	Undetermined	Undetermined	Undetermined	Undetermined	Undetermined	Undetermined	Undetermined	36.5522	Undetermined
O1	2829	hsa-miR-1200	Undetermined	Undetermined	Undetermined	Undetermined	Undetermined	Undetermined	Undetermined	Undetermined	Undetermined	Undetermined	Undetermined	Undetermined	Undetermined	33.7868	Undetermined	36.8068	Undetermined	34.323	37.6901	Undetermined	37.2843	36.3208	37.5102	38.1364
O10	2845	hsa-miR-1272	Undetermined	Undetermined	Undetermined	Undetermined	Undetermined	Undetermined	Undetermined	Undetermined	Undetermined	Undetermined	Undetermined	Undetermined	Undetermined	Undetermined	Undetermined	Undetermined	Undetermined	Undetermined	Undetermined	Undetermined	Undetermined	Undetermined	Undetermined	Undetermined
O11	2847	hsa-miR-1180	Undetermined	35.5567	36.2621	32.5124	33.3654	32.1257	30.8463	32.2633	32.7641	33.1186	34.0303	33.6988	26.798	26.2065	26.0413	25.2444	26.4125	25.1467	25.4302	24.6629	26.4219	25.38	24.2736	24.615
O12	2850	hsa-miR-1256	Undetermined	Undetermined	Undetermined	Undetermined	Undetermined	Undetermined	Undetermined	36.7938	Undetermined	Undetermined	34.5412	33.0197	33.3771	31.968	Undetermined	Undetermined	33.8949	34.5764	Undetermined	Undetermined	31.9656	34.4552	33.5684	34.5696
O13	2851	hsa-miR-1278	Undetermined	Undetermined	Undetermined	Undetermined	Undetermined	Undetermined	Undetermined	Undetermined	Undetermined	Undetermined	Undetermined	34.8238	34.0794	Undetermined	Undetermined	35.0887	Undetermined	Undetermined	32.986	Undetermined	Undetermined	35.1866	Undetermined	34.3879
O14	2852	hsa-miR-1262	Undetermined	35.3871	Undetermined	35.3498	Undetermined	33.3845	34.3721	Undetermined	32.0315	Undetermined	Undetermined	33.8709	33.6312	31.7289	34.2251	Undetermined	32.8167	31.5323	32.6791	30.9726	34.0879	Undetermined	31.4538	30.8549
O15	2854	hsa-miR-1243	Undetermined	Undetermined	37.9911	Undetermined	Undetermined	Undetermined	Undetermined	Undetermined	Undetermined	Undetermined	Undetermined	Undetermined	Undetermined	32.5687	Undetermined	32.9798	Undetermined	35.3784	Undetermined	Undetermined	Undetermined	Undetermined	36.2218	34.2292
O16	2857	hsa-miR-663B	32.6666	Undetermined	Undetermined	Undetermined	32.731	32.0056	29.7479	Undetermined	Undetermined	Undetermined	Undetermined	Undetermined	25.881	25.6389	27.7203	26.0651	26.4397	25.8521	25.3255	27.8878	26.2716	26.3559	25.5226	25.8701
O17	2860	hsa-miR-1252	Undetermined	Undetermined	Undetermined	Undetermined	Undetermined	Undetermined	Undetermined	Undetermined	Undetermined	Undetermined	Undetermined	Undetermined	Undetermined	Undetermined	Undetermined	Undetermined	Undetermined	Undetermined	Undetermined	Undetermined	Undetermined	Undetermined	Undetermined	Undetermined
O18	2861	hsa-miR-1298	Undetermined	Undetermined	Undetermined	Undetermined	Undetermined	Undetermined	Undetermined	Undetermined	Undetermined	Undetermined	Undetermined	Undetermined	Undetermined	Undetermined	Undetermined	Undetermined	Undetermined	Undetermined	Undetermined	Undetermined	Undetermined	Undetermined	Undetermined	Undetermined
O19	2863	hsa-miR-1290	30.1863	31.3935	29.5663	29.544	29.1274	30.7921	27.9821	25.911	28.5268	29.7982	28.3907	25.7005	25.9785	23.5552	24.639	28.0309	27.4576	23.9943	25.2302	26.558	26.5311	26.8642	24.9874	26.5085
O2	2830	hsa-miR-1182	Undetermined	Undetermined	Undetermined	Undetermined	Undetermined	Undetermined	Undetermined	Undetermined	Undetermined	Undetermined	Undetermined	Undetermined	Undetermined	Undetermined	Undetermined	Undetermined	Undetermined	Undetermined	Undetermined	Undetermined	Undetermined	Undetermined	Undetermined	Undetermined
O20	2868	hsa-miR-1249	Undetermined	36.5286	Undetermined	34.1147	Undetermined	36.9318	Undetermined	Undetermined	Undetermined	Undetermined	Undetermined	Undetermined	Undetermined	Undetermined	Undetermined	Undetermined	Undetermined	Undetermined	Undetermined	Undetermined	Undetermined	Undetermined	Undetermined	Undetermined
O21	2870	hsa-miR-1248	Undetermined	Undetermined	Undetermined	Undetermined	Undetermined	Undetermined	33.3265	Undetermined	Undetermined	Undetermined	Undetermined	Undetermined	27.5483	25.9004	27.3811	27.6287	27.4435	26.3596	26.5749	26.7992	28.5456	27.1969	27.2348	25.9862
O22	2871	hsa-miR-1289	Undetermined	Undetermined	Undetermined	Undetermined	36.4928	Undetermined	Undetermined	Undetermined	Undetermined	Undetermined	Undetermined	33.3245	Undetermined	Undetermined	Undetermined	Undetermined	Undetermined	Undetermined	Undetermined	Undetermined	Undetermined	37.0449	Undetermined	Undetermined
O23	2872	hsa-miR-1204	Undetermined	Undetermined	Undetermined	Undetermined	Undetermined	Undetermined	Undetermined	Undetermined	Undetermined	Undetermined	Undetermined	Undetermined	Undetermined	Undetermined	Undetermined	Undetermined	Undetermined	Undetermined	Undetermined	Undetermined	Undetermined	Undetermined	Undetermined	Undetermined
O24	2873	hsa-miR-1826	Undetermined	Undetermined	Undetermined	Undetermined	Undetermined	Undetermined	Undetermined	Undetermined	Undetermined	Undetermined	Undetermined	Undetermined	Undetermined	Undetermined	Undetermined	Undetermined	Undetermined	Undetermined	Undetermined	Undetermined	Undetermined	Undetermined	Undetermined	Undetermined
O3	2832	hsa-miR-1288	Undetermined	Undetermined	Undetermined	Undetermined	Undetermined	Undetermined	Undetermined	Undetermined	Undetermined	Undetermined	Undetermined	Undetermined	Undetermined	Undetermined	Undetermined	Undetermined	Undetermined	Undetermined	Undetermined	Undetermined	Undetermined	Undetermined	Undetermined	Undetermined
O4	2838	hsa-miR-1291	33.1121	35.1858	32.6448	33.1591	32.5043	32.2697	30.9898	30.2805	31.8324	31.9542	32.6251	30.5933	27.5539	26.064	26.9989	28.1026	27.6815	26.21	25.5927	26.446	25.0469	25.8365	23.9894	25.0925
O5	2840	hsa-miR-1275	Undetermined	Undetermined	Undetermined	Undetermined	Undetermined	Undetermined	Undetermined	Undetermined	Undetermined	Undetermined	Undetermined	Undetermined	25.8182	24.9545	26.075	25.0086	24.3177	24.0063	24.8866	24.5305	26.5122	24.4549	23.9625	25.7538
O6	2841	hsa-miR-1183	Undetermined	Undetermined	Undetermined	Undetermined	Undetermined	Undetermined	34.3032	Undetermined	33.5577	Undetermined	Undetermined	30.2937	28.9194	28.9417	30.8681	29.944	31.2149	31.1875	29.1669	30.7915	31.6623	31.7179	30.1912	30.0109
O7	2842	hsa-miR-1184	Undetermined	Undetermined	Undetermined	Undetermined	Undetermined	Undetermined	Undetermined	Undetermined	Undetermined	Undetermined	Undetermined	Undetermined	Undetermined	Undetermined	Undetermined	Undetermined	Undetermined	Undetermined	Undetermined	Undetermined	Undetermined	Undetermined	Undetermined	Undetermined
O8	2843	hsa-miR-1276	37.7864	Undetermined	35.2172	Undetermined	Undetermined	Undetermined	35.6572	Undetermined	Undetermined	33.6131	Undetermined	33.0877	31.2459	30.2113	31.8491	32.0183	33.0766	32.5091	31.2837	32.1492	30.4467	32.6642	30.9791	30.9834
O9	2844	hsa-miR-320B	31.0906	29.8897	29.6323	31.3171	30.913	29.9964	27.7154	28.6005	28.5587	27.7808	29.2083	28.0702	24.8725	23.1976	24.5741	23.472	23.4781	23.9442	25.024	23.6824	26.0386	24.7234	24.5611	24.2345
P1	2874	hsa-miR-1304	Undetermined	Undetermined	Undetermined	Undetermined	Undetermined	Undetermined	Undetermined	Undetermined	Undetermined	Undetermined	Undetermined	Undetermined	Undetermined	Undetermined	Undetermined	Undetermined	Undetermined	Undetermined	Undetermined	Undetermined	Undetermined	Undetermined	Undetermined	Undetermined
P10	2887	hsa-miR-1250	Undetermined	Undetermined	Undetermined	Undetermined	Undetermined	Undetermined	Undetermined	Undetermined	Undetermined	Undetermined	Undetermined	Undetermined	Undetermined	Undetermined	Undetermined	Undetermined	Undetermined	Undetermined	Undetermined	Undetermined	Undetermined	Undetermined	Undetermined	Undetermined
P11	2888	hsa-miR-548N	Undetermined	Undetermined	Undetermined	Undetermined	Undetermined	Undetermined	Undetermined	Undetermined	Undetermined	Undetermined	Undetermined	Undetermined	Undetermined	Undetermined	Undetermined	Undetermined	Undetermined	Undetermined	Undetermined	Undetermined	Undetermined	Undetermined	Undetermined	Undetermined
P12	2890	hsa-miR-1283	Undetermined	Undetermined	Undetermined	Undetermined	Undetermined	35.1423	Undetermined	Undetermined	Undetermined	Undetermined	Undetermined	Undetermined	Undetermined	Undetermined	Undetermined	Undetermined	Undetermined	Undetermined	Undetermined	Undetermined	Undetermined	Undetermined	Undetermined	Undetermined
P13	2893	hsa-miR-1247	32.8153	Undetermined	Undetermined	Undetermined	Undetermined	Undetermined	31.9958	31.4337	Undetermined	33.4655	31.414	29.5914	Undetermined	Undetermined	25.656	26.5281	25.7699	30.905	27.3683	25.9829	28.8423	26.9359	24.7902	26.4094
P14	2894	hsa-miR-1253	Undetermined	Undetermined	Undetermined	Undetermined	Undetermined	Undetermined	Undetermined	Undetermined	Undetermined	Undetermined	Undetermined	Undetermined	Undetermined	Undetermined	Undetermined	Undetermined	Undetermined	Undetermined	Undetermined	Undetermined	Undetermined	Undetermined	Undetermined	Undetermined
P15	2895	hsa-miR-720	21.9732	24.9579	24.0893	25.1986	22.1536	24.5393	20.7134	19.0183	22.9253	22.4496	23.9694	21.604	12.7509	12.083	12.7833	13.1666	12.9323	11.9859	12.0225	11.3581	14.6641	12.0378	12.0528	12.3826
P16	2896	hsa-miR-1260	28.3109	30.6155	30.3335	31.1665	27.5855	30.9129	27.2484	25.3941	29.6211	27.5689	30.3863	27.4105	18.3641	17.3486	18.4988	18.6661	19.0814	18.174	17.9843	17.0013	20.1907	18.2311	17.7786	18.0437
P17	2897	hsa-miR-664	Undetermined	Undetermined	31.1716	Undetermined	31.7719	Undetermined	30.7508	Undetermined	Undetermined	Undetermined	Undetermined	30.1117	24.0224	22.727	23.7167	23.9423	23.5705	22.5627	22.5488	21.8855	24.4257	22.6803	22.2421	21.5569
P18	2901	hsa-miR-1302	Undetermined	Undetermined	Undetermined	Undetermined	Undetermined	Undetermined	Undetermined	Undetermined	Undetermined	Undetermined	Undetermined	Undetermined	Undetermined	Undetermined	35.7476	36.789	33.3039	36.4082	36.0128	Undetermined	Undetermined	Undetermined	Undetermined	33.982
P19	2902	hsa-miR-1300	Undetermined	35.9571	Undetermined	35.8539	33.9773	Undetermined	33.622	Undetermined	35.0633	36.4526	Undetermined	33.3146	27.0968	25.6246	26.3429	28.9524	28.2956	25.7754	26.2382	27.1202	26.5583	27.1644	25.3783	26.2653
P2	2877	hsa-miR-1203	Undetermined	Undetermined	Undetermined	Undetermined	Undetermined	Undetermined	Undetermined	Undetermined	Undetermined	Undetermined	Undetermined	Undetermined	Undetermined	Undetermined	Undetermined	Undetermined	Undetermined	Undetermined	Undetermined	Undetermined	Undetermined	Undetermined	Undetermined	Undetermined
P20	2903	hsa-miR-1284	Undetermined	Undetermined	Undetermined	Undetermined	Undetermined	Undetermined	Undetermined	Undetermined	Undetermined	Undetermined	Undetermined	Undetermined	Undetermined	Undetermined	Undetermined	Undetermined	Undetermined	Undetermined	Undetermined	Undetermined	Undetermined	Undetermined	Undetermined	Undetermined
P21	2904	hsa-miR-548L	Undetermined	Undetermined	Undetermined	Undetermined	Undetermined	Undetermined	Undetermined	Undetermined	Undetermined	Undetermined	Undetermined	36.9282	33.6383	Undetermined	34.018	34.4129	33.1632	Undetermined	Undetermined	Undetermined	Undetermined	Undetermined	Undetermined	Undetermined
P22	2905	hsa-miR-1293	Undetermined	Undetermined	Undetermined	Undetermined	Undetermined	Undetermined	Undetermined	Undetermined	Undetermined	Undetermined	Undetermined	Undetermined	Undetermined	Undetermined	Undetermined	Undetermined	Undetermined	Undetermined	Undetermined	Undetermined	Undetermined	Undetermined	Undetermined	Undetermined
P23	2907	hsa-miR-1825	33.1441	Undetermined	Undetermined	33.1468	Undetermined	33.8501	Undetermined	Undetermined	32.3481	Undetermined	Undetermined	30.1733	27.6204	26.9876	30.6698	28.2885	Undetermined	28.8423	27.7975	Undetermined	Undetermined	Undetermined	Undetermined	27.8673
P24	2908	hsa-miR-1296	Undetermined	Undetermined	Undetermined	Undetermined	Undetermined	Undetermined	Undetermined	Undetermined	Undetermined	Undetermined	Undetermined	Undetermined	Undetermined	Undetermined	Undetermined	Undetermined	Undetermined	Undetermined	Undetermined	30.923	Undetermined	Undetermined	Undetermined	29.9335
P3	2878	hsa-miR-1206	Undetermined	Undetermined	Undetermined	Undetermined	Undetermined	Undetermined	Undetermined	Undetermined	Undetermined	Undetermined	Undetermined	Undetermined	Undetermined	Undetermined	Undetermined	Undetermined	Undetermined	Undetermined	Undetermined	Undetermined	Undetermined	Undetermined	Undetermined	Undetermined
P4	2879	hsa-miR-548G	Undetermined	Undetermined	Undetermined	Undetermined	Undetermined	Undetermined	Undetermined	Undetermined	Undetermined	Undetermined	Undetermined	Undetermined	Undetermined	Undetermined	Undetermined	Undetermined	Undetermined	Undetermined	Undetermined	Undetermined	Undetermined	Undetermined	Undetermined	Undetermined
P5	2880	hsa-miR-1208	Undetermined	Undetermined	Undetermined	Undetermined	Undetermined	Undetermined	Undetermined	Undetermined	Undetermined	Undetermined	Undetermined	Undetermined	Undetermined	32.8903	Undetermined	Undetermined	Undetermined	Undetermined	Undetermined	Undetermined	Undetermined	36.0284	Undetermined	Undetermined
P6	2881	hsa-miR-548E	35.9381	Undetermined	Undetermined	Undetermined	Undetermined	Undetermined	Undetermined	Undetermined	Undetermined	Undetermined	Undetermined	Undetermined	35.4708	33.0356	35.1945	34.0004	33.8605	34.8744	33.8004	Undetermined	36.3863	33.8798	Undetermined	36.838
P7	2883	hsa-miR-1274A	25.9609	25.9846	26.4076	26.2346	25.2225	26.605	24.6924	22.7742	25.489	25.1796	26.4883	24.4262	16.1978	14.5132	15.4567	16.6801	16.4214	15.9508	16.1863	14.9952	18.3349	16.0428	15.8488	16.56
P8	2884	hsa-miR-1274B	21.5898	21.4471	21.6961	21.9439	20.2596	21.846	20.1053	18.8774	20.9774	20.579	22.0696	19.7182	11.8955	11.6763	12.4135	12.3472	11.9194	11.4121	11.3452	10.7091	14.0985	11.2983	10.7634	11.8927
P9	2885	hsa-miR-1267	Undetermined	36.2849	Undetermined	Undetermined	Undetermined	38.7591	33.1417	Undetermined	35.6579	Undetermined	34.163	32.1314	32.2946	Undetermined	32.2114	32.6729	Undetermined	Undetermined	32.4957	Undetermined	Undetermined	33.6856	Undetermined	32.3948

## Sheet: Assay List - Array A
				denotes control
				‡ = denotes less optimal performance in pool
		Well location	Assay ID	Assay Name	Target Sequence	- PreAmp	+ PreAmp
		A1	377	hsa-let-7a	UGAGGUAGUAGGUUGUAUAGUU	----	‡
		A2	379	hsa-let-7c	UGAGGUAGUAGGUUGUAUGGUU	----	----
		A3	2283	hsa-let-7d	AGAGGUAGUAGGUUGCAUAGUU	----	----
		A4	2406	hsa-let-7e	UGAGGUAGGAGGUUGUAUAGUU	----	----
		A5	382	hsa-let-7f	UGAGGUAGUAGAUUGUAUAGUU	----	‡
		A6	2282	hsa-let-7g	UGAGGUAGUAGUUUGUACAGUU	----	----
		A7	2222	hsa-miR-1	UGGAAUGUAAAGAAGUAUGUAU	----	----
		A8	583	hsa-miR-9	UCUUUGGUUAUCUAGCUGUAUGA	----	----
		A9	387	hsa-miR-10a	UACCCUGUAGAUCCGAAUUUGUG	----	----
		A10	2218	hsa-miR-10b	UACCCUGUAGAACCGAAUUUGUG	----	----
		A11	1973	U6 snRNA	GUGCUCGCUUCGGCAGCACAUAUACUAAAAUUGGAACGAUACAGAGAAGAUUAGCAUGGCCCCUGCGCAAGGAUGACACGCAAAUUCGUGAAGCGUUCCAUAUUUUUACUGCCCUCCAUGCCCUGCCCCACAAACGCUCUGAUAACAGUCUGUCCCUGUCUCUCUCCUGCUGCUCCUAUGGAAGCGAAGUUUUCCGCUCCUGCAGAAAGCAAAGUUACGACUCAGAGACGGCUGAGGAUGACAUCAGCGAUGUGCAGGGAACCCAGCGCCUGGAGCUUCGGGAUGACGGGGCCUUCAGCACCCCCACGGGGGGUUCUGACACCCUGGUGGGCACCUCCCUGGACACACCCCCGACCUCCGUGACAGGCACCUCAGAGGAGCAAGUGAGCUGGUGGGGCA…	----	----
		A12	1973	U6 snRNA	GUGCUCGCUUCGGCAGCACAUAUACUAAAAUUGGAACGAUACAGAGAAGAUUAGCAUGGCCCCUGCGCAAGGAUGACACGCAAAUUCGUGAAGCGUUCCAUAUUUUUACUGCCCUCCAUGCCCUGCCCCACAAACGCUCUGAUAACAGUCUGUCCCUGUCUCUCUCCUGCUGCUCCUAUGGAAGCGAAGUUUUCCGCUCCUGCAGAAAGCAAAGUUACGACUCAGAGACGGCUGAGGAUGACAUCAGCGAUGUGCAGGGAACCCAGCGCCUGGAGCUUCGGGAUGACGGGGCCUUCAGCACCCCCACGGGGGGUUCUGACACCCUGGUGGGCACCUCCCUGGACACACCCCCGACCUCCGUGACAGGCACCUCAGAGGAGCAAGUGAGCUGGUGGGGCA…	----	----
		A13	389	hsa-miR-15a	UAGCAGCACAUAAUGGUUUGUG	----	----
		A14	390	hsa-miR-15b	UAGCAGCACAUCAUGGUUUACA	----	----
		A15	391	hsa-miR-16	UAGCAGCACGUAAAUAUUGGCG	----	----
		A16	2308	hsa-miR-17	CAAAGUGCUUACAGUGCAGGUAG	----	----
		A17	2422	hsa-miR-18a	UAAGGUGCAUCUAGUGCAGAUAG	----	----
		A18	2217	hsa-miR-18b	UAAGGUGCAUCUAGUGCAGUUAG	----	----
		A19	395	hsa-miR-19a	UGUGCAAAUCUAUGCAAAACUGA	----	----
		A20	396	hsa-miR-19b	UGUGCAAAUCCAUGCAAAACUGA	----	----
		A21	580	hsa-miR-20a	UAAAGUGCUUAUAGUGCAGGUAG	----	----
		A22	1014	hsa-miR-20b	CAAAGUGCUCAUAGUGCAGGUAG	----	----
		A23	397	hsa-miR-21	UAGCUUAUCAGACUGAUGUUGA	----	----
		A24	398	hsa-miR-22	AAGCUGCCAGUUGAAGAACUGU	----	----
		B1	399	hsa-miR-23a	AUCACAUUGCCAGGGAUUUCC	----	‡
		B2	400	hsa-miR-23b	AUCACAUUGCCAGGGAUUACC	----	----
		B3	402	hsa-miR-24	UGGCUCAGUUCAGCAGGAACAG	----	----
		B4	403	hsa-miR-25	CAUUGCACUUGUCUCGGUCUGA	----	----
		B5	405	hsa-miR-26a	UUCAAGUAAUCCAGGAUAGGCU	----	----
		B6	407	hsa-miR-26b	UUCAAGUAAUUCAGGAUAGGU	----	----
		B7	408	hsa-miR-27a	UUCACAGUGGCUAAGUUCCGC	----	----
		B8	409	hsa-miR-27b	UUCACAGUGGCUAAGUUCUGC	----	----
		B9	2446	hsa-miR-28-3p	CACUAGAUUGUGAGCUCCUGGA	----	----
		B10	411	hsa-miR-28	AAGGAGCUCACAGUCUAUUGAG	----	----
		B11	1973	U6 snRNA	GUGCUCGCUUCGGCAGCACAUAUACUAAAAUUGGAACGAUACAGAGAAGAUUAGCAUGGCCCCUGCGCAAGGAUGACACGCAAAUUCGUGAAGCGUUCCAUAUUUUUACUGCCCUCCAUGCCCUGCCCCACAAACGCUCUGAUAACAGUCUGUCCCUGUCUCUCUCCUGCUGCUCCUAUGGAAGCGAAGUUUUCCGCUCCUGCAGAAAGCAAAGUUACGACUCAGAGACGGCUGAGGAUGACAUCAGCGAUGUGCAGGGAACCCAGCGCCUGGAGCUUCGGGAUGACGGGGCCUUCAGCACCCCCACGGGGGGUUCUGACACCCUGGUGGGCACCUCCCUGGACACACCCCCGACCUCCGUGACAGGCACCUCAGAGGAGCAAGUGAGCUGGUGGGGCA…	----	----
		B12	1973	U6 snRNA	GUGCUCGCUUCGGCAGCACAUAUACUAAAAUUGGAACGAUACAGAGAAGAUUAGCAUGGCCCCUGCGCAAGGAUGACACGCAAAUUCGUGAAGCGUUCCAUAUUUUUACUGCCCUCCAUGCCCUGCCCCACAAACGCUCUGAUAACAGUCUGUCCCUGUCUCUCUCCUGCUGCUCCUAUGGAAGCGAAGUUUUCCGCUCCUGCAGAAAGCAAAGUUACGACUCAGAGACGGCUGAGGAUGACAUCAGCGAUGUGCAGGGAACCCAGCGCCUGGAGCUUCGGGAUGACGGGGCCUUCAGCACCCCCACGGGGGGUUCUGACACCCUGGUGGGCACCUCCCUGGACACACCCCCGACCUCCGUGACAGGCACCUCAGAGGAGCAAGUGAGCUGGUGGGGCA…	----	----
		B13	2112	hsa-miR-29a	UAGCACCAUCUGAAAUCGGUUA	----	----
		B14	413	hsa-miR-29b	UAGCACCAUUUGAAAUCAGUGUU	----	----
		B15	587	hsa-miR-29c	UAGCACCAUUUGAAAUCGGUUA	----	----
		B16	602	hsa-miR-30b	UGUAAACAUCCUACACUCAGCU	----	----
		B17	419	hsa-miR-30c	UGUAAACAUCCUACACUCUCAGC	----	----
		B18	2279	hsa-miR-31	AGGCAAGAUGCUGGCAUAGCU	----	----
		B19	2109	hsa-miR-32	UAUUGCACAUUACUAAGUUGCA	----	----
		B20	2085	hsa-miR-33b	GUGCAUUGCUGUUGCAUUGC	----	----
		B21	426	hsa-miR-34a	UGGCAGUGUCUUAGCUGGUUGU	----	----
		B22	428	hsa-miR-34c	AGGCAGUGUAGUUAGCUGAUUGC	----	----
		B23	431	hsa-miR-92a	UAUUGCACUUGUCCCGGCCUGU	----	----
		B24	1090	mmu-miR-93	CAAAGUGCUGUUCGUGCAGGUAG	----	----
		C1	433	hsa-miR-95	UUCAACGGGUAUUUAUUGAGCA	----	----
		C2	186	mmu-miR-96	UUUGGCACUAGCACAUUUUUGCU	----	----
		C3	577	hsa-miR-98	UGAGGUAGUAAGUUGUAUUGUU	----	----
		C4	435	hsa-miR-99a	AACCCGUAGAUCCGAUCUUGUG	----	----
		C5	436	hsa-miR-99b	CACCCGUAGAACCGACCUUGCG	----	----
		C6	437	hsa-miR-100	AACCCGUAGAUCCGAACUUGUG	----	----
		C7	2253	hsa-miR-101	UACAGUACUGUGAUAACUGAA	----	----
		C8	439	hsa-miR-103	AGCAGCAUUGUACAGGGCUAUGA	----	----
		C9	2167	hsa-miR-105	UCAAAUGCUCAGACUCCUGUGGU	----	----
		C10	2169	hsa-miR-106a	AAAAGUGCUUACAGUGCAGGUAG	----	----
		C11	1094	RNU44	CCUGGAUGAUGAUAGCAAAUGCUGACUGAACAUGAAGGUCUUAAUUAGCUCUAACUGACU	----	----
		C12	442	hsa-miR-106b	UAAAGUGCUGACAGUGCAGAU	----	----
		C13	443	hsa-miR-107	AGCAGCAUUGUACAGGGCUAUCA	----	----
		C14	2245	hsa-miR-122	UGGAGUGUGACAAUGGUGUUUG	----	----
		C15	1182	mmu-miR-124a	UAAGGCACGCGGUGAAUGCC	----	----
		C16	2199	hsa-miR-125a-3p	ACAGGUGAGGUUCUUGGGAGCC	----	----
		C17	2198	hsa-miR-125a-5p	UCCCUGAGACCCUUUAACCUGUGA	----	----
		C18	449	hsa-miR-125b	UCCCUGAGACCCUAACUUGUGA	----	----
		C19	2228	hsa-miR-126	UCGUACCGUGAGUAAUAAUGCG	----	----
		C20	452	hsa-miR-127	UCGGAUCCGUCUGAGCUUGGCU	----	----
		C21	2229	hsa-miR-127-5p	CUGAAGCUCAGAGGGCUCUGAU	----	----
		C22	2216	hsa-miR-128a	UCACAGUGAACCGGUCUCUUU	----	----
		C23	1184	mmu-miR-129-3p	AAGCCCUUACCCCAAAAAGCAU	----	----
		C24	590	hsa-miR-129	CUUUUUGCGGUCUGGGCUUGC	----	‡
		D1	454	hsa-miR-130a	CAGUGCAAUGUUAAAAGGGCAU	----	----
		D2	456	hsa-miR-130b	CAGUGCAAUGAUGAAAGGGCAU	----	----
		D3	457	hsa-miR-132	UAACAGUCUACAGCCAUGGUCG	----	----
		D4	2246	hsa-miR-133a	UUUGGUCCCCUUCAACCAGCUG	----	----
		D5	2247	hsa-miR-133b	UUUGGUCCCCUUCAACCAGCUA	----	----
		D6	1186	mmu-miR-134	UGUGACUGGUUGACCAGAGGGG	----	----
		D7	460	hsa-miR-135a	UAUGGCUUUUUAUUCCUAUGUGA	----	----
		D8	2261	hsa-miR-135b	UAUGGCUUUUCAUUCCUAUGUGA	----	----
		D9	592	hsa-miR-136	ACUCCAUUUGUUUUGAUGAUGGA	----	----
		D10	1129	mmu-miR-137	UUAUUGCUUAAGAAUACGCGUAG	----	----
		D11	2284	hsa-miR-138	AGCUGGUGUUGUGAAUCAGGCCG	----	----
		D12	2313	hsa-miR-139-3p	GGAGACGCGGCCCUGUUGGAGU	----	----
		D13	2289	hsa-miR-139-5p	UCUACAGUGCACGUGUCUCCAG	----	----
		D14	2234	hsa-miR-140-3p	UACCACAGGGUAGAACCACGG	----	----
		D15	1187	mmu-miR-140	CAGUGGUUUUACCCUAUGGUAG	----	----
		D16	463	hsa-miR-141	UAACACUGUCUGGUAAAGAUGG	----	----
		D17	464	hsa-miR-142-3p	UGUAGUGUUUCCUACUUUAUGGA	----	----
		D18	2248	hsa-miR-142-5p	CAUAAAGUAGAAAGCACUACU	----	----
		D19	2249	hsa-miR-143	UGAGAUGAAGCACUGUAGCUC	----	----
		D20	2278	hsa-miR-145	GUCCAGUUUUCCCAGGAAUCCCU	----	----
		D21	468	hsa-miR-146a	UGAGAACUGAAUUCCAUGGGUU	----	----
		D22	2361	hsa-miR-146b-3p	UGCCCUGUGGACUCAGUUCUGG	----	----
		D23	1097	hsa-miR-146b	UGAGAACUGAAUUCCAUAGGCU	----	----
		D24	2262	hsa-miR-147b	GUGUGCGGAAAUGCUUCUGCUA	----	----
		E1	470	hsa-miR-148a	UCAGUGCACUACAGAACUUUGU	----	----
		E2	471	hsa-miR-148b	UCAGUGCAUCACAGAACUUUGU	----	----
		E3	2255	hsa-miR-149	UCUGGCUCCGUGUCUUCACUCCC	----	----
		E4	473	hsa-miR-150	UCUCCCAACCCUUGUACCAGUG	----	----
		E5	475	hsa-miR-152	UCAGUGCAUGACAGAACUUGG	----	----
		E6	1191	mmu-miR-153	UUGCAUAGUCACAAAAGUGAUC	----	----
		E7	477	hsa-miR-154	UAGGUUAUCCGUGUUGCCUUCG	----	----
		E8	480	hsa-miR-181a	AACAUUCAACGCUGUCGGUGAGU	----	----
		E9	482	hsa-miR-181c	AACAUUCAACCUGUCGGUGAGU	----	----
		E10	2334	hsa-miR-182	UUUGGCAAUGGUAGAACUCACACU	----	----
		E11	1006	RNU48	GAUGACCCCAGGUAACUCUGAGUGUGUCGCUGAUGCCAUCACCGCAGCGCUCUGACC	----	----
		E12	2269	hsa-miR-183	UAUGGCACUGGUAGAAUUCACU	----	----
		E13	485	hsa-miR-184	UGGACGGAGAACUGAUAAGGGU	----	----
		E14	2271	hsa-miR-185	UGGAGAGAAAGGCAGUUCCUGA	----	----
		E15	2285	hsa-miR-186	CAAAGAAUUCUCCUUUUGGGCU	----	----
		E16	1193	mmu-miR-187	UCGUGUCUUGUGUUGCAGCCGG	----	----
		E17	2106	hsa-miR-188-3p	CUCCCACAUGCAGGGUUUGCA	----	----
		E18	489	hsa-miR-190	UGAUAUGUUUGAUAUAUUAGGU	----	----
		E19	2299	hsa-miR-191	CAACGGAAUCCCAAAAGCAGCUG	----	----
		E20	491	hsa-miR-192	CUGACCUAUGAAUUGACAGCC	----	----
		E21	2250	hsa-miR-193a-3p	AACUGGCCUACAAAGUCCCAGU	----	----
		E22	2281	hsa-miR-193a-5p	UGGGUCUUUGCGGGCGAGAUGA	----	----
		E23	2367	hsa-miR-193b	AACUGGCCCUCAAAGUCCCGCU	----	----
		E24	493	hsa-miR-194	UGUAACAGCAACUCCAUGUGGA	----	----
		F1	494	hsa-miR-195	UAGCAGCACAGAAAUAUUGGC	----	----
		F2	2215	hsa-miR-196b	UAGGUAGUUUCCUGUUGUUGGG	----	----
		F3	497	hsa-miR-197	UUCACCACCUUCUCCACCCAGC	----	----
		F4	2273	hsa-miR-198	GGUCCAGAGGGGAGAUAGGUUC	----	----
		F5	498	hsa-miR-199a	CCCAGUGUUCAGACUACCUGUUC	----	----
		F6	2304	hsa-miR-199a-3p	ACAGUAGUCUGCACAUUGGUUA	----	----
		F7	500	hsa-miR-199b	CCCAGUGUUUAGACUAUCUGUUC	----	----
		F8	502	hsa-miR-200a	UAACACUGUCUGGUAACGAUGU	----	----
		F9	2251	hsa-miR-200b	UAAUACUGCCUGGUAAUGAUGA	----	----
		F10	2300	hsa-miR-200c	UAAUACUGCCGGGUAAUGAUGGA	----	----
		F11	2363	hsa-miR-202	AGAGGUAUAGGGCAUGGGAA	----	----
		F12	507	hsa-miR-203	GUGAAAUGUUUAGGACCACUAG	----	----
		F13	508	hsa-miR-204	UUCCCUUUGUCAUCCUAUGCCU	----	----
		F14	509	hsa-miR-205	UCCUUCAUUCCACCGGAGUCUG	----	----
		F15	2290	hsa-miR-208b	AUAAGACGAACAAAAGGUUUGU	----	----
		F16	512	hsa-miR-210	CUGUGCGUGUGACAGCGGCUGA	----	----
		F17	2306	hsa-miR-214	ACAGCAGGCACAGACAGGCAGU	----	----
		F18	518	hsa-miR-215	AUGACCUAUGAAUUGACAGAC	----	----
		F19	2220	hsa-miR-216a	UAAUCUCAGCUGGCAACUGUGA	----	----
		F20	2326	hsa-miR-216b	AAAUCUCUGCAGGCAAAUGUGA	----	----
		F21	2337	hsa-miR-217	UACUGCAUCAGGAACUGAUUGGA	----	----
		F22	521	hsa-miR-218	UUGUGCUUGAUCUAACCAUGU	----	----
		F23	522	hsa-miR-219	UGAUUGUCCAAACGCAAUUCU	----	----
		F24	524	hsa-miR-221	AGCUACAUUGUCUGCUGGGUUUC	----	----
		G1	2276	hsa-miR-222	AGCUACAUCUGGCUACUGGGU	----	----
		G2	2295	hsa-miR-223	UGUCAGUUUGUCAAAUACCCCA	----	----
		G3	2099	hsa-miR-224	CAAGUCACUAGUGGUUCCGUU	----	----
		G4	2101	hsa-miR-296-3p	GAGGGUUGGGUGGAGGCUCUCC	----	----
		G5	527	hsa-miR-296	AGGGCCCCCCCUCAAUCCUGU	----	----
		G6	1015	hsa-miR-299-3p	UAUGUGGGAUGGUAAACCGCUU	----	----
		G7	600	hsa-miR-299-5p	UGGUUUACCGUCCCACAUACAU	----	----
		G8	528	hsa-miR-301	CAGUGCAAUAGUAUUGUCAAAGC	----	----
		G9	2392	hsa-miR-301b	CAGUGCAAUGAUAUUGUCAAAGC	----	----
		G10	529	hsa-miR-302a	UAAGUGCUUCCAUGUUUUGGUGA	----	----
		G11	338	ath-miR159a	UUUGGAUUGAAGGGAGCUCUA	----	----
		G12	531	hsa-miR-302b	UAAGUGCUUCCAUGUUUUAGUAG	----	----
		G13	533	hsa-miR-302c	UAAGUGCUUCCAUGUUUCAGUGG	----	----
		G14	2277	hsa-miR-320	AAAAGCUGGGUUGAGAGGGCGA	----	----
		G15	2227	hsa-miR-323-3p	CACAUUACACGGUCGACCUCU	‡	‡
		G16	2161	hsa-miR-324-3p	ACUGCCCCAGGUGCUGCUGG	----	----
		G17	539	hsa-miR-324-5p	CGCAUCCCCUAGGGCAUUGGUGU	----	----
		G18	542	hsa-miR-326	CCUCUGGGCCCUUCCUCCAG	----	----
		G19	543	hsa-miR-328	CUGGCCCUCUCUGCCCUUCCGU	----	----
		G20	1101	hsa-miR-329	AACACACCUGGUUAACCUCUUU	----	----
		G21	544	hsa-miR-330	GCAAAGCACACGGCCUGCAGAGA	----	----
		G22	2230	hsa-miR-330-5p	UCUCUGGGCCUGUGUCUUAGGC	----	----
		G23	545	hsa-miR-331	GCCCCUGGGCCUAUCCUAGAA	----	----
		G24	2233	hsa-miR-331-5p	CUAGGUAUGGUCCCAGGGAUCC	----	----
		H1	546	hsa-miR-335	UCAAGAGCAAUAACGAAAAAUGU	----	----
		H2	2156	hsa-miR-337-5p	GAACGGCUUCAUACAGGAGUU	----	----
		H3	2252	hsa-miR-338-3p	UCCAGCAUCAGUGAUUUUGUUG	----	----
		H4	2184	hsa-miR-339-3p	UGAGCGCCUCGACGACAGAGCCG	----	----
		H5	2257	hsa-miR-339-5p	UCCCUGUCCUCCAGGAGCUCACG	----	----
		H6	2258	hsa-miR-340	UUAUAAAGCAAUGAGACUGAUU	----	----
		H7	2623	hsa-miR-155	UUAAUGCUAAUCGUGAUAGGGGU	‡	----
		H8	2619	hsa-let-7b	UGAGGUAGUAGGUUGUGUGGUU	----	----
		H9	2260	hsa-miR-342-3p	UCUCACACAGAAAUCGCACCCGU	----	----
		H10	2147	hsa-miR-342-5p	AGGGGUGCUAUCUGUGAUUGA	----	----
		H11	2186	hsa-miR-345	GCUGACUCCUAGUCCAGGGCUC	----	----
		H12	554	hsa-miR-361	UUAUCAGAAUCUCCAGGGGUAC	----	----
		H13	2117	hsa-miR-362-3p	AACACACCUAUUCAAGGAUUCA	----	----
		H14	1273	hsa-miR-362	AAUCCUUGGAACCUAGGUGUGAGU	----	----
		H15	1271	hsa-miR-363	AAUUGCACGGUAUCCAUCUGUA	----	----
		H16	1020	hsa-miR-365	UAAUGCCCCUAAAAAUCCUUAU	----	----
		H17	555	hsa-miR-367	AAUUGCACUUUAGCAAUGGUGA	----	----
		H18	557	hsa-miR-369-3p	AAUAAUACAUGGUUGAUCUUU	----	----
		H19	1021	hsa-miR-369-5p	AGAUCGACCGUGUUAUAUUCGC	----	----
		H20	2275	hsa-miR-370	GCCUGCUGGGGUGGAACCUGGU	----	----
		H21	2124	hsa-miR-371-3p	AAGUGCCGCCAUCUUUUGAGUGU	----	----
		H22	560	hsa-miR-372	AAAGUGCUGCGACAUUUGAGCGU	----	----
		H23	561	hsa-miR-373	GAAGUGCUUCGAUUUUGGGGUGU	----	----
		H24	563	hsa-miR-374	UUAUAAUACAACCUGAUAAGUG	----	----
		I1	1319	mmu-miR-374-5p	AUAUAAUACAACCUGCUAAGUG	----	----
		I2	564	hsa-miR-375	UUUGUUCGUUCGGCUCGCGUGA	----	----
		I3	565	hsa-miR-376a	AUCAUAGAGGAAAAUCCACGU	----	----
		I4	1102	hsa-miR-376b	AUCAUAGAGGAAAAUCCAUGUU	----	----
		I5	566	hsa-miR-377	AUCACACAAAGGCAACUUUUGU	‡	----
		I6	1138	mmu-miR-379	UGGUAGACUAUGGAACGUAGG	----	----
		I7	569	hsa-miR-380-3p	UAUGUAAUAUGGUCCACAUCUU	----	----
		I8	571	hsa-miR-381	UAUACAAGGGCAAGCUCUCUGU	----	----
		I9	572	hsa-miR-382	GAAGUUGUUCGUGGUGGAUUCG	----	----
		I10	573	hsa-miR-383	AGAUCAGAAGGUGAUUGUGGCU	----	----
		I11	2331	hsa-miR-409-5p	AGGUUACCCGAGCAACUUUGCAU	----	----
		I12	1274	hsa-miR-410	AAUAUAACACAGAUGGCCUGU	----	----
		I13	1610	hsa-miR-411	UAGUAGACCGUAUAGCGUACG	----	----
		I14	2297	hsa-miR-422a	ACUGGACUUAGGGUCAGAAGGC	----	----
		I15	2340	hsa-miR-423-5p	UGAGGGGCAGAGAGCGAGACUUU	----	----
		I16	604	hsa-miR-424	CAGCAGCAAUUCAUGUUUUGAA	----	----
		I17	1516	hsa-miR-425-5p	AAUGACACGAUCACUCCCGUUGA	----	----
		I18	1024	hsa-miR-429	UAAUACUGUCUGGUAAAACCGU	----	----
		I19	1979	hsa-miR-431	UGUCUUGCAGGCCGUCAUGCA	----	----
		I20	1028	hsa-miR-433	AUCAUGAUGGGCUCCUCGGUGU	----	----
		I21	1030	hsa-miR-449	UGGCAGUGUAUUGUUAGCUGGU	----	----
		I22	1608	hsa-miR-449b	AGGCAGUGUAUUGUUAGCUGGC	----	----
		I23	2303	hsa-miR-450a	UUUUGCGAUGUGUUCCUAAUAU	----	----
		I24	2208	hsa-miR-450b-3p	UUGGGAUCAUUUUGCAUCCAUA	----	----
		J1	2207	hsa-miR-450b-5p	UUUUGCAAUAUGUUCCUGAAUA	----	----
		J2	1141	mmu-miR-451	AAACCGUUACCAUUACUGAGUU	----	----
		J3	2329	hsa-miR-452	AACUGUUUGCAGAGGAAACUGA	----	----
		J4	2318	hsa-miR-453	AGGUUGUCCGUGGUGAGUUCGCA	----	----
		J5	2323	hsa-miR-454	UAGUGCAAUAUUGCUUAUAGGGU	----	----
		J6	2244	hsa-miR-455-3p	GCAGUCCAUGGGCAUAUACAC	----	----
		J7	1280	hsa-miR-455	UAUGUGCCUUUGGACUACAUCG	----	----
		J8	2338	hsa-miR-483-5p	AAGACGGGAGGAAAGAAGGGAG	----	----
		J9	1821	hsa-miR-484	UCAGGCUCAGUCCCCUCCCGAU	----	----
		J10	1277	hsa-miR-485-3p	GUCAUACACGGCUCUCCUCUCU	----	----
		J11	1036	hsa-miR-485-5p	AGAGGCUGGCCGUGAUGAAUUC	----	‡
		J12	2093	hsa-miR-486-3p	CGGGGCAGCUCAGUACAGGAU	----	----
		J13	1278	hsa-miR-486	UCCUGUACUGAGCUGCCCCGAG	----	----
		J14	1279	hsa-miR-487a	AAUCAUACAGGGACAUCCAGUU	----	----
		J15	1285	hsa-miR-487b	AAUCGUACAGGGUCAUCCACUU	----	----
		J16	2357	hsa-miR-488	UUGAAAGGCUAUUUCUUGGUC	----	----
		J17	2358	hsa-miR-489	GUGACAUCACAUAUACGGCAGC	----	----
		J18	1037	hsa-miR-490	CAACCUGGAGGACUCCAUGCUG	----	----
		J19	2360	hsa-miR-491-3p	CUUAUGCAAGAUUCCCUUCUAC	----	----
		J20	1630	mmu-miR-491	AGUGGGGAACCCUUCCAUGAGG	----	----
		J21	2364	hsa-miR-493	UGAAGGUCUACUGUGUGCCAGG	----	----
		J22	2365	hsa-miR-494	UGAAACAUACACGGGAAACCUC	----	----
		J23	1663	mmu-miR-495	AAACAAACAUGGUGCACUUCUU	----	----
		J24	1953	mmu-miR-496	UGAGUAUUACAUGGCCAAUCUC	----	----
		K1	2427	hsa-miR-499-3p	AACAUCACAGCAAGUCUGUGCU	----	----
		K2	1352	mmu-miR-499	UUAAGACUUGCAGUGAUGUUU	----	----
		K3	2428	hsa-miR-500	UAAUCCUUGCUACCUGGGUGAGA	----	----
		K4	2435	hsa-miR-501-3p	AAUGCACCCGGGCAAGGAUUCU	----	----
		K5	1047	hsa-miR-501	AAUCCUUUGUCCCUGGGUGAGA	----	----
		K6	2083	hsa-miR-502-3p	AAUGCACCUGGGCAAGGAUUCA	----	----
		K7	1109	hsa-miR-502	AUCCUUGCUAUCUGGGUGCUA	----	----
		K8	1048	hsa-miR-503	UAGCAGCGGGAACAGUUCUGCAG	----	----
		K9	2084	hsa-miR-504	AGACCCUGGUCUGCACUCUAUC	----	----
		K10	2089	hsa-miR-505	CGUCAACACUUGCUGGUUUCCU	----	----
		K11	1051	hsa-miR-507	UUUUGCACCUUUUGGAGUGAA	----	----
		K12	1052	hsa-miR-508	UGAUUGUAGCCUUUUGGAGUAGA	----	----
		K13	2092	hsa-miR-508-5p	UACUCCAGAGGGCGUCACUCAUG	----	----
		K14	2235	hsa-miR-509-5p	UACUGCAGACAGUGGCAAUCA	----	----
		K15	2241	hsa-miR-510	UACUCAGGAGAGUGGCAAUCAC	----	----
		K16	1823	hsa-miR-512-3p	AAGUGCUGUCAUAGCUGAGGUC	----	----
		K17	1145	hsa-miR-512-5p	CACUCAGCCUUGAGGGCACUUUC	----	----
		K18	2090	hsa-miR-513-5p	UUCACAGGGAGGUGUCAU	----	----
		K19	2369	hsa-miR-515-3p	GAGUGCCUUCUUUUGGAGCGUU	----	----
		K20	1112	hsa-miR-515-5p	UUCUCCAAAAGAAAGCACUUUCUG	----	----
		K21	2416	hsa-miR-516a-5p	UUCUCGAGGAAAGAAGCACUUUC	----	----
		K22	1150	hsa-miR-516b	AUCUGGAGGUAAGAAGCACUUU	----	----
		K23	2402	hsa-miR-517a	AUCGUGCAUCCCUUUAGAGUGU	----	----
		K24	1153	hsa-miR-517c	AUCGUGCAUCCUUUUAGAGUGU	----	----
		L1	2397	hsa-miR-518a-3p	GAAAGCGCUUCCCUUUGCUGGA	----	----
		L2	2396	hsa-miR-518a-5p	CUGCAAAGGGAAGCCCUUUC	----	----
		L3	1156	hsa-miR-518b	CAAAGCGCUCCCCUUUAGAGGU	----	----
		L4	2401	hsa-miR-518c	CAAAGCGCUUCUCUUUAGAGUGU	----	----
		L5	1159	hsa-miR-518d	CAAAGCGCUUCCCUUUGGAGC	----	‡
		L6	2389	hsa-miR-518d-5p	CUCUAGAGGGAAGCACUUUCUG	----	----
		L7	2395	hsa-miR-518e	AAAGCGCUUCCCUUCAGAGUG	----	----
		L8	2388	hsa-miR-518f	GAAAGCGCUUCUCUUUAGAGG	----	----
		L9	2415	hsa-miR-519a	AAAGUGCAUCCUUUUAGAGUGU	----	----
		L10	2403	hsa-miR-519d	CAAAGUGCCUCCCUUUAGAGUG	----	----
		L11	2370	hsa-miR-519e	AAGUGCCUCCUUUUAGAGUGUU	----	----
		L12	1167	hsa-miR-520a	AAAGUGCUUCCCUUUGGACUGU	----	----
		L13	1168	hsa-miR-520a#	CUCCAGAGGGAAGUACUUUCU	----	----
		L14	2393	hsa-miR-520d-5p	CUACAAAGGGAAGCCCUUUC	----	‡
		L15	1121	hsa-miR-520g	ACAAAGUGCUUCCCUUUAGAGUGU	----	----
		L16	1122	hsa-miR-521	AACGCACUUCCCUUUAGAGUGU	----	----
		L17	2413	hsa-miR-522	AAAAUGGUUCCCUUUAGAGUGU	----	----
		L18	2386	hsa-miR-523	GAACGCGCUUCCCUAUAGAGGGU	----	----
		L19	1982	hsa-miR-524-5p	CUACAAAGGGAAGCACUUUCUC	----	----
		L20	2385	hsa-miR-525-3p	GAAGGCGCUUCCCUUUAGAGCG	----	----
		L21	1174	hsa-miR-525	CUCCAGAGGGAUGCACUUUCU	----	----
		L22	2382	hsa-miR-526b	CUCUUGAGGGAAGCACUUUCUGU	----	----
		L23	2355	hsa-miR-532-3p	CCUCCCACACCCAAGGCUUGCA	----	----
		L24	1518	hsa-miR-532	CAUGCCUUGAGUGUAGGACCGU	----	----
		M1	1286	hsa-miR-539	GGAGAAAUUAUCCUUGGUGUGU	----	----
		M2	2201	hsa-miR-541	UGGUGGGCACAGAAUCUGGACU	----	----
		M3	1284	hsa-miR-542-3p	UGUGACAGAUUGAUAACUGAAA	----	----
		M4	2240	hsa-miR-542-5p	UCGGGGAUCAUCAUGUCACGAGA	----	----
		M5	2265	hsa-miR-544	AUUCUGCAUUUUUAGCAAGUUC	----	----
		M6	2267	hsa-miR-545	UCAGCAAACAUUUAUUGUGUGC	----	----
		M7	1538	hsa-miR-548a	CAAAACUGGCAAUUACUUUUGC	----	‡
		M8	2412	hsa-miR-548a-5p	AAAAGUAAUUGCGAGUUUUACC	----	----
		M9	1541	hsa-miR-548b	CAAGAACCUCAGUUGCUUUUGU	----	‡
		M10	2408	hsa-miR-548b-5p	AAAAGUAAUUGUGGUUUUGGCC	----	----
		M11	1590	hsa-miR-548c	CAAAAAUCUCAAUUACUUUUGC	----	‡
		M12	2429	hsa-miR-548c-5p	AAAAGUAAUUGCGGUUUUUGCC	----	----
		M13	1605	hsa-miR-548d	CAAAAACCACAGUUUCUUUUGC	----	----
		M14	2237	hsa-miR-548d-5p	AAAAGUAAUUGUGGUUUUUGCC	----	----
		M15	1535	hsa-miR-551b	GCGACCCAUACUUGGUUUCAG	----	----
		M16	2345	hsa-miR-556-3p	AUAUUACCAUUAGCUCAUCUUU	----	----
		M17	2344	hsa-miR-556-5p	GAUGAGCUCAUUGUAAUAUGAG	----	----
		M18	1528	hsa-miR-561	CAAAGUUUAAGAUCCUUGAAGU	----	----
		M19	2347	hsa-miR-570	CGAAAACAGCAAUUACCUUUGC	----	----
		M20	2349	hsa-miR-574-3p	CACGCUCAUGCACACACCCACA	----	----
		M21	2351	hsa-miR-576-3p	AAGAUGUGGAAAAAUUGGAAUC	----	----
		M22	2350	hsa-miR-576-5p	AUUCUAAUUUCUCCACGUCUUU	----	----
		M23	2398	hsa-miR-579	UUCAUUUGGUAUAAACCGCGAUU	----	----
		M24	2399	hsa-miR-582-3p	UAACUGGUUGAACAACUGAACC	----	----
		N1	1983	hsa-miR-582-5p	UUACAGUUGUUCAACCAGUUACU	----	----
		N2	2409	hsa-miR-589	UGAGAACCACGUCUGCUCUGAG	----	----
		N3	1984	hsa-miR-590-5p	GAGCUUAUUCAUAAAAGUGCAG	----	----
		N4	1551	hsa-miR-597	UGUGUCACUCGAUGACCACUGU	----	‡
		N5	1988	hsa-miR-598	UACGUCAUCGUUGUCAUCGUCA	----	----
		N6	1960	mmu-miR-615	UCCGAGCCUGGGUCUCCCUCUU	----	----
		N7	2353	hsa-miR-615-5p	GGGGGUCCCCGGUGCUCGGAUC	----	----
		N8	2414	hsa-miR-616	AGUCAUUGGAGGGUUUGAGCAG	----	----
		N9	1593	hsa-miR-618	AAACUCUACUUGUCCUUCUGAGU	----	----
		N10	2430	hsa-miR-624	CACAAGGUAUUGGUAUUACCU	----	----
		N11	2431	hsa-miR-625	AGGGGGAAAGUUCUAUAGUCC	----	----
		N12	1560	hsa-miR-627	GUGAGUCUCUAAGAAAAGAGGA	----	----
		N13	2433	hsa-miR-628-5p	AUGCUGACAUAUUUACUAGAGG	----	----
		N14	2436	hsa-miR-629	UGGGUUUACGUUGGGAGAACU	----	----
		N15	2088	hsa-miR-636	UGUGCUUGCUCGUCCCGCCCGCA	----	----
		N16	1592	hsa-miR-642	GUCCCUCUCCAAAUGUGUCUUG	----	----
		N17	1604	hsa-miR-651	UUUAGGAUAAGCUUGACUUUUG	----	----
		N18	2352	hsa-miR-652	AAUGGCGCCACUAGGGUUGUG	----	----
		N19	2292	hsa-miR-653	GUGUUGAAACAAUCUCUACUG	----	----
		N20	2239	hsa-miR-654-3p	UAUGUCUGCUGACCAUCACCUU	----	----
		N21	1611	hsa-miR-654	UGGUGGGCCGCAGAACAUGUGC	----	----
		N22	1612	hsa-miR-655	AUAAUACAUGGUUAACCUCUUU	----	----
		N23	1515	hsa-miR-660	UACCCAUUGCAUAUCGGAGUUG	----	----
		N24	2322	hsa-miR-671-3p	UCCGGUUCUCAGGGCUCCACC	----	----
		O1	2327	hsa-miR-672	UGAGGUUGGUGUACUGUGUGUGA	----	----
		O2	2021	hsa-miR-674	GCACUGAGAUGGGAGUGGUGUA	----	----
		O3	2341	hsa-miR-708	AAGGAGCUUACAAUCUAGCUGGG	----	----
		O4	2324	hsa-miR-744	UGCGGGGCUAGGGCUAACAGCA	----	----
		O5	1990	hsa-miR-758	UUUGUGACCUGGUCCACUAACC	----	----
		O6	2354	hsa-miR-871	UAUUCAGAUUAGUGCCAGUCAUG	----	----
		O7	2264	hsa-miR-872	AAGGUUACUUGUUAGUUCAGG	----	----
		O8	2356	hsa-miR-873	GCAGGAACUUGUGAGUCUCCU	----	----
		O9	2268	hsa-miR-874	CUGCCCUGGCCCGAGGGACCGA	----	----
		O10	2204	hsa-miR-875-3p	CCUGGAAACACUGAGGUUGUG	----	----
		O11	2225	hsa-miR-876-3p	UGGUGGUUUACAAAGUAAUUCA	----	----
		O12	2205	hsa-miR-876-5p	UGGAUUUCUUUGUGAAUCACCA	----	----
		O13	2372	hsa-miR-885-3p	AGGCAGCGGGGUGUAGUGGAUA	----	----
		O14	2296	hsa-miR-885-5p	UCCAUUACACUACCCUGCCUCU	----	----
		O15	2194	hsa-miR-886-3p	CGCGGGUGCUUACUGACCCUU	----	----
		O16	2193	hsa-miR-886-5p	CGGGUCGGAGUUAGCUCAAGCGG	----	----
		O17	2374	hsa-miR-887	GUGAACGGGCGCCAUCCCGAGG	----	----
		O18	2212	hsa-miR-888	UACUCAAAAAGCUGUCAGUCA	----	----
		O19	2202	hsa-miR-889	UUAAUAUCGGACAACCAUUGU	----	----
		O20	2209	hsa-miR-890	UACUUGGAAAGGCAUCAGUUG	----	----
		O21	2191	hsa-miR-891a	UGCAACGAACCUGAGCCACUGA	----	----
		O22	2210	hsa-miR-891b	UGCAACUUACCUGAGUCAUUGA	----	----
		O23	2195	hsa-miR-892a	CACUGUGUCCUUUCUGCGUAG	----	----
		O24	469	hsa-miR-147	GUGUGUGGAAAUGCUUCUGC	----	----
		P1	511	hsa-miR-208	AUAAGACGAGCAAAAAGCUUGU	----	----
		P2	514	hsa-miR-211	UUCCCUUUGUCAUCCUUCGCCU	----	----
		P3	515	hsa-miR-212	UAACAGUCUCCAGUCACGGCC	----	----
		P4	2095	hsa-miR-219-1-3p	AGAGUUGAGUCUGGACGUCCCG	----	----
		P5	2390	hsa-miR-219-2-3p	AGAAUUGUGGCUGGACAUCUGU	----	----
		P6	523	hsa-miR-220	CCACACCGUAUCUGACACUUU	----	----
		P7	2206	hsa-miR-220b	CCACCACCGUGUCUGACACUU	----	----
		P8	2211	hsa-miR-220c	ACACAGGGCUGUUGUGAAGACU	----	----
		P9	2190	hsa-miR-298	AGCAGAAGCAGGGAGGUUCUCCCA	----	----
		P10	540	hsa-miR-325	CCUAGUAGGUGUCCAGUAAGUGU	----	----
		P11	553	hsa-miR-346	UGUCUGCCCGCAUGCCUGCCUCU	----	----
		P12	2122	hsa-miR-376c	AACAUAGAGGAAAUUCCACGU	----	----
		P13	574	hsa-miR-384	AUUCCUAGAAAUUGUUCAUA	----	----
		P14	1023	hsa-miR-412	ACUUCACCUGGUCCACUAGCCGU	----	----
		P15	1029	hsa-miR-448	UUGCAUAUGUAGGAUGUCCCAU	----	----
		P16	1039	hsa-miR-492	AGGACCUGCGGGACAAGAUUCUU	----	----
		P17	1050	hsa-miR-506	UAAGGCACCCUUCUGAGUAGA	----	----
		P18	2155	hsa-miR-509-3-5p	UACUGCAGACGUGGCAAUCAUG	----	----
		P19	1111	hsa-miR-511	GUGUCUUUUGCUCUGCAGUCA	----	----
		P20	1152	hsa-miR-517b	UCGUGCAUCCCUUUAGAGUGUU	----	----
		P21	1163	hsa-miR-519c	AAAGUGCAUCUUUUUAGAGGAU	----	----
		P22	1116	hsa-miR-520b	AAAGUGCUUCCUUUUAGAGGG	----	----
		P23	1119	hsa-miR-520e	AAAGUGCUUCCUUUUUGAGGG	----	----
		P24	1120	hsa-miR-520f	AAGUGCUUCCUUUUAGAGGGUU	----	----

## Sheet: Assay List - Array B
				denotes control
				‡ = denotes less optimal performance in pool
		Well location	Assay ID	Assay Name	Target Sequence	- PreAmp	+ PreAmp
		A1	268	dme-miR-7	UGGAAGACUAGUGAUUUUGUUGU	----	----
		A2	2909	hsa-miR-548I	AAAAGUAAUUGCGGAUUUUGCC	----	----
		A3	416	hsa-miR-30a-3p	CUUUCAGUCGGAUGUUUGCAGC	----	----
		A4	417	hsa-miR-30a-5p	UGUAAACAUCCUCGACUGGAAG	----	‡
		A5	420	hsa-miR-30d	UGUAAACAUCCCCGACUGGAAG	----	----
		A6	422	hsa-miR-30e-3p	CUUUCAGUCGGAUGUUUACAGC	----	‡
		A7	427	hsa-miR-34b	UAGGCAGUGUCAUUAGCUGAUUG	----	----
		A8	451	hsa-miR-126#	CAUUAUUACUUUUGGUACGCG	----	----
		A9	478	hsa-miR-154#	AAUCAUACACGGUUGACCUAUU	----	----
		A10	483	hsa-miR-182#	UGGUUCUAGACUUGCCAACUA	----	----
		A11	1973	U6 snRNA	GUGCUCGCUUCGGCAGCACAUAUACUAAAAUUGGAACGAUACAGAGAAGAUUAGCAUGGCCCCUGCGCAAGGAUGACACGCAAAUUCGUGAAGCGUUCCAUAUUUUUACUGCCCUCCAUGCCCUGCCCCACAAACGCUCUGAUAACAGUCUGUCCCUGUCUCUCUCCUGCUGCUCCUAUGGAAGCGAAGUUUUCCGCUCCUGCAGAAAGCAAAGUUACGACUCAGAGACGGCUGAGGAUGACAUCAGCGAUGUGCAGGGAACCCAGCGCCUGGAGCUUCGGGAUGACGGGGCCUUCAGCACCCCCACGGGGGGUUCUGACACCCUGGUGGGCACCUCCCUGGACACACCCCCGACCUCCGUGACAGGCACCUCAGAGGAGCAAGUGAGCUGGUGGGGCA…	----	----
		A12	1973	U6 snRNA	GUGCUCGCUUCGGCAGCACAUAUACUAAAAUUGGAACGAUACAGAGAAGAUUAGCAUGGCCCCUGCGCAAGGAUGACACGCAAAUUCGUGAAGCGUUCCAUAUUUUUACUGCCCUCCAUGCCCUGCCCCACAAACGCUCUGAUAACAGUCUGUCCCUGUCUCUCUCCUGCUGCUCCUAUGGAAGCGAAGUUUUCCGCUCCUGCAGAAAGCAAAGUUACGACUCAGAGACGGCUGAGGAUGACAUCAGCGAUGUGCAGGGAACCCAGCGCCUGGAGCUUCGGGAUGACGGGGCCUUCAGCACCCCCACGGGGGGUUCUGACACCCUGGUGGGCACCUCCCUGGACACACCCCCGACCUCCGUGACAGGCACCUCAGAGGAGCAAGUGAGCUGGUGGGGCA…	----	----
		A13	510	hsa-miR-206	UGGAAUGUAAGGAAGUGUGUGG	----	----
		A14	516	hsa-miR-213	ACCAUCGACCGUUGAUUGUACC	----	----
		A15	534	hsa-miR-302c#	UUUAACAUGGGGGUACCUGCUG	----	----
		A16	535	hsa-miR-302d	UAAGUGCUUCCAUGUUUGAGUGU	----	----
		A17	567	hsa-miR-378	CUCCUGACUCCAGGUCCUGUGU	----	----
		A18	570	hsa-miR-380-5p	UGGUUGACCAUAGAACAUGCGC	----	----
		A19	2910	hsa-miR-1257	AGUGAAUGAUGGGUUCUGACC	----	----
		A20	1011	hsa-miR-200a#	CAUCUUACCGGACAGUGCUGGA	----	----
		A21	1026	hsa-miR-432	UCUUGGAGUAGGUCAUUGGGUGG	----	----
		A22	1027	hsa-miR-432#	CUGGAUGGCUCCUCCAUGUCU	----	----
		A23	1043	hsa-miR-497	CAGCAGCACACUGUGGUUUGU	----	----
		A24	1046	hsa-miR-500	AUGCACCUGGGCAAGGAUUCUG	----	----
		B1	2927	hsa-miR-1238	CUUCCUCGUCUGUCUGCCCC	----	----
		B2	1106	hsa-miR-488	CCCAGAUAAUGGCACUCUCAA	----	----
		B3	1113	hsa-miR-517#	CCUCUAGAUGGAAGCACUGUCU	----	----
		B4	1149	hsa-miR-516-3p	UGCUUCCUUUCAGAGGGU	----	‡
		B5	1158	hsa-miR-518c#	UCUCUGGAGGGAAGCACUUUCUG	----	----
		B6	1166	hsa-miR-519e#	UUCUCCAAAAGGGAGCACUUUC	----	----
		B7	1170	hsa-miR-520h	ACAAAGUGCUUCCCUUUAGAGU	----	----
		B8	1173	hsa-miR-524	GAAGGCGCUUCCCUUUGGAGU	----	----
		B9	1178	mmu-let-7d#	CUAUACGACCUGCUGCCUUUCU	----	‡
		B10	1283	hsa-miR-363#	CGGGUGGAUCACGAUGCAAUUU	----	----
		B11	1973	U6 snRNA	GUGCUCGCUUCGGCAGCACAUAUACUAAAAUUGGAACGAUACAGAGAAGAUUAGCAUGGCCCCUGCGCAAGGAUGACACGCAAAUUCGUGAAGCGUUCCAUAUUUUUACUGCCCUCCAUGCCCUGCCCCACAAACGCUCUGAUAACAGUCUGUCCCUGUCUCUCUCCUGCUGCUCCUAUGGAAGCGAAGUUUUCCGCUCCUGCAGAAAGCAAAGUUACGACUCAGAGACGGCUGAGGAUGACAUCAGCGAUGUGCAGGGAACCCAGCGCCUGGAGCUUCGGGAUGACGGGGCCUUCAGCACCCCCACGGGGGGUUCUGACACCCUGGUGGGCACCUCCCUGGACACACCCCCGACCUCCGUGACAGGCACCUCAGAGGAGCAAGUGAGCUGGUGGGGCA…	----	----
		B12	1973	U6 snRNA	GUGCUCGCUUCGGCAGCACAUAUACUAAAAUUGGAACGAUACAGAGAAGAUUAGCAUGGCCCCUGCGCAAGGAUGACACGCAAAUUCGUGAAGCGUUCCAUAUUUUUACUGCCCUCCAUGCCCUGCCCCACAAACGCUCUGAUAACAGUCUGUCCCUGUCUCUCUCCUGCUGCUCCUAUGGAAGCGAAGUUUUCCGCUCCUGCAGAAAGCAAAGUUACGACUCAGAGACGGCUGAGGAUGACAUCAGCGAUGUGCAGGGAACCCAGCGCCUGGAGCUUCGGGAUGACGGGGCCUUCAGCACCCCCACGGGGGGUUCUGACACCCUGGUGGGCACCUCCCUGGACACACCCCCGACCUCCGUGACAGGCACCUCAGAGGAGCAAGUGAGCUGGUGGGGCA…	----	----
		B13	1338	rno-miR-7#	CAACAAAUCACAGUCUGCCAUA	----	----
		B14	1510	hsa-miR-656	AAUAUUAUACAGUCAACCUCU	----	----
		B15	1511	hsa-miR-549	UGACAACUAUGGAUGAGCUCU	----	----
		B16	1512	hsa-miR-657	GGCAGGUUCUCACCCUCUCUAGG	----	----
		B17	1513	hsa-miR-658	GGCGGAGGGAAGUAGGUCCGUUGGU	----	----
		B18	1514	hsa-miR-659	CUUGGUUCAGGGAGGGUCCCCA	----	----
		B19	1519	hsa-miR-551a	GCGACCCACUCUUGGUUUCCA	----	----
		B20	1520	hsa-miR-552	AACAGGUGACUGGUUAGACAA	----	----
		B21	1521	hsa-miR-553	AAAACGGUGAGAUUUUGUUUU	----	----
		B22	1522	hsa-miR-554	GCUAGUCCUGACUCAGCCAGU	----	----
		B23	1523	hsa-miR-555	AGGGUAAGCUGAACCUCUGAU	----	----
		B24	1525	hsa-miR-557	GUUUGCACGGGUGGGCCUUGUCU	----	----
		C1	1526	hsa-miR-558	UGAGCUGCUGUACCAAAAU	----	----
		C2	1527	hsa-miR-559	UAAAGUAAAUAUGCACCAAAA	----	----
		C3	1529	hsa-miR-562	AAAGUAGCUGUACCAUUUGC	----	----
		C4	1530	hsa-miR-563	AGGUUGACAUACGUUUCCC	----	----
		C5	1531	hsa-miR-564	AGGCACGGUGUCAGCAGGC	----	----
		C6	1533	hsa-miR-566	GGGCGCCUGUGAUCCCAAC	----	----
		C7	1534	hsa-miR-567	AGUAUGUUCUUCCAGGACAGAAC	----	----
		C8	1536	hsa-miR-569	AGUUAAUGAAUCCUGGAAAGU	----	----
		C9	1539	hsa-miR-586	UAUGCAUUGUAUUUUUAGGUCC	----	----
		C10	1540	hsa-miR-587	UUUCCAUAGGUGAUGAGUCAC	----	----
		C11	1094	RNU44	CCUGGAUGAUGAUAGCAAAUGCUGACUGAACAUGAAGGUCUUAAUUAGCUCUAACUGACU	----	----
		C12	1542	hsa-miR-588	UUGGCCACAAUGGGUUAGAAC	----	----
		C13	1543	hsa-miR-589	UCAGAACAAAUGCCGGUUCCCAGA	----	----
		C14	1544	hsa-miR-550	UGUCUUACUCCCUCAGGCACAU	----	----
		C15	1545	hsa-miR-591	AGACCAUGGGUUCUCAUUGU	----	----
		C16	1546	hsa-miR-592	UUGUGUCAAUAUGCGAUGAUGU	----	----
		C17	1547	hsa-miR-593	AGGCACCAGCCAGGCAUUGCUCAGC	----	----
		C18	1550	hsa-miR-596	AAGCCUGCCCGGCUCCUCGGG	----	----
		C19	1553	hsa-miR-622	ACAGUCUGCUGAGGUUGGAGC	----	----
		C20	1554	hsa-miR-599	GUUGUGUCAGUUUAUCAAAC	----	----
		C21	1555	hsa-miR-623	AUCCCUUGCAGGGGCUGUUGGGU	----	----
		C22	1556	hsa-miR-600	ACUUACAGACAAGAGCCUUGCUC	----	----
		C23	1557	hsa-miR-624	UAGUACCAGUACCUUGUGUUCA	----	----
		C24	1558	hsa-miR-601	UGGUCUAGGAUUGUUGGAGGAG	----	‡
		D1	1559	hsa-miR-626	AGCUGUCUGAAAAUGUCUU	----	----
		D2	1562	hsa-miR-629	GUUCUCCCAACGUAAGCCCAGC	----	----
		D3	1563	hsa-miR-630	AGUAUUCUGUACCAGGGAAGGU	----	----
		D4	1564	hsa-miR-631	AGACCUGGCCCAGACCUCAGC	----	----
		D5	1566	hsa-miR-603	CACACACUGCAAUUACUUUUGC	----	----
		D6	1567	hsa-miR-604	AGGCUGCGGAAUUCAGGAC	----	----
		D7	1568	hsa-miR-605	UAAAUCCCAUGGUGCCUUCUCCU	----	----
		D8	1569	hsa-miR-606	AAACUACUGAAAAUCAAAGAU	----	----
		D9	1570	hsa-miR-607	GUUCAAAUCCAGAUCUAUAAC	----	----
		D10	1571	hsa-miR-608	AGGGGUGGUGUUGGGACAGCUCCGU	----	----
		D11	1573	hsa-miR-609	AGGGUGUUUCUCUCAUCUCU	----	----
		D12	1574	hsa-miR-633	CUAAUAGUAUCUACCACAAUAAA	----	----
		D13	1576	hsa-miR-634	AACCAGCACCCCAACUUUGGAC	----	----
		D14	1578	hsa-miR-635	ACUUGGGCACUGAAACAAUGUCC	----	----
		D15	1581	hsa-miR-637	ACUGGGGGCUUUCGGGCUCUGCGU	----	----
		D16	1582	hsa-miR-638	AGGGAUCGCGGGCGGGUGGCGGCCU	----	----
		D17	1583	hsa-miR-639	AUCGCUGCGGUUGCGAGCGCUGU	----	----
		D18	1584	hsa-miR-640	AUGAUCCAGGAACCUGCCUCU	----	----
		D19	1585	hsa-miR-641	AAAGACAUAGGAUAGAGUCACCUC	----	----
		D20	1586	hsa-miR-613	AGGAAUGUUCCUUCUUUGCC	----	----
		D21	1587	hsa-miR-614	GAACGCCUGUUCUUGCCAGGUGG	----	----
		D22	1589	hsa-miR-616	ACUCAAAACCCUUCAGUGACUU	----	----
		D23	1591	hsa-miR-617	AGACUUCCCAUUUGAAGGUGGC	----	----
		D24	1594	hsa-miR-643	ACUUGUAUGCUAGCUCAGGUAG	----	----
		E1	1596	hsa-miR-644	AGUGUGGCUUUCUUAGAGC	----	----
		E2	1597	hsa-miR-645	UCUAGGCUGGUACUGCUGA	----	‡
		E3	1598	hsa-miR-621	GGCUAGCAACAGCGCUUACCU	----	----
		E4	1599	hsa-miR-646	AAGCAGCUGCCUCUGAGGC	----	----
		E5	1600	hsa-miR-647	GUGGCUGCACUCACUUCCUUC	----	----
		E6	1601	hsa-miR-648	AAGUGUGCAGGGCACUGGU	----	----
		E7	1602	hsa-miR-649	AAACCUGUGUUGUUCAAGAGUC	----	----
		E8	1603	hsa-miR-650	AGGAGGCAGCGCUCUCAGGAC	----	----
		E9	1606	hsa-miR-661	UGCCUGGGUCUCUGGCCUGCGCGU	----	----
		E10	1607	hsa-miR-662	UCCCACGUUGUGGCCCAGCAG	----	----
		E11	1006	RNU48	GAUGACCCCAGGUAACUCUGAGUGUGUCGCUGAUGCCAUCACCGCAGCGCUCUGACC	----	----
		E12	1613	hsa-miR-571	UGAGUUGGCCAUCUGAGUGAG	----	----
		E13	1614	hsa-miR-572	GUCCGCUCGGCGGUGGCCCA	----	----
		E14	1615	hsa-miR-573	CUGAAGUGAUGUGUAACUGAUCAG	----	----
		E15	1617	hsa-miR-575	GAGCCAGUUGGACAGGAGC	----	----
		E16	1619	hsa-miR-578	CUUCUUGUGCUCUAGGAUUGU	----	----
		E17	1621	hsa-miR-580	UUGAGAAUGAUGAAUCAUUAGG	----	----
		E18	1622	hsa-miR-581	UCUUGUGUUCUCUAGAUCAGU	----	----
		E19	1623	hsa-miR-583	CAAAGAGGAAGGUCCCAUUAC	----	‡
		E20	1624	hsa-miR-584	UUAUGGUUUGCCUGGGACUGAG	----	----
		E21	1625	hsa-miR-585	UGGGCGUAUCUGUAUGCUA	----	----
		E22	1818	rno-miR-29c#	UGACCGAUUUCUCCUGGUGUUC	----	----
		E23	1986	hsa-miR-766	ACUCCAGCCCCACAGCCUCAGC	----	----
		E24	1987	hsa-miR-595	GAAGUGUGCCGUGGUGUGUCU	----	----
		F1	1992	hsa-miR-668	UGUCACUCGGCUCGGCCCACUAC	----	----
		F2	1993	hsa-miR-767-5p	UGCACCAUGGUUGUCUGAGCAUG	----	----
		F3	1995	hsa-miR-767-3p	UCUGCUCAUACCCCAUGGUUUCU	----	----
		F4	1996	hsa-miR-454#	ACCCUAUCAAUAUUGUCUCUGC	----	----
		F5	1998	hsa-miR-769-5p	UGAGACCUCUGGGUUCUGAGCU	----	----
		F6	2002	hsa-miR-770-5p	UCCAGUACCACGUGUCAGGGCCA	----	----
		F7	2003	hsa-miR-769-3p	CUGGGAUCUCCGGGGUCUUGGUU	----	----
		F8	2004	hsa-miR-802	CAGUAACAAAGAUUCAUCCUUGU	----	----
		F9	2005	hsa-miR-675	UGGUGCGGAGAGGGCCCACAGUG	----	----
		F10	2087	hsa-miR-505#	GGGAGCCAGGAAGUAUUGAUGU	----	----
		F11	2094	hsa-miR-218-1#	AUGGUUCCGUCAAGCACCAUGG	----	----
		F12	2096	hsa-miR-221#	ACCUGGCAUACAAUGUAGAUUU	----	----
		F13	2097	hsa-miR-222#	CUCAGUAGCCAGUGUAGAUCCU	----	----
		F14	2098	hsa-miR-223#	CGUGUAUUUGACAAGCUGAGUU	----	----
		F15	2100	hsa-miR-136#	CAUCAUCGUCUCAAAUGAGUCU	----	----
		F16	2102	hsa-miR-34b	CAAUCACUAACUCCACUGCCAU	----	----
		F17	2104	hsa-miR-185#	AGGGGCUGGCUUUCCUCUGGUC	----	----
		F18	2105	hsa-miR-186#	GCCCAAAGGUGAAUUUUUUGGG	----	----
		F19	2107	hsa-miR-195#	CCAAUAUUGGCUGUGCUGCUCC	----	----
		F20	2108	hsa-miR-30c-1#	CUGGGAGAGGGUUGUUUACUCC	----	----
		F21	2110	hsa-miR-30c-2#	CUGGGAGAAGGCUGUUUACUCU	----	----
		F22	2111	hsa-miR-32#	CAAUUUAGUGUGUGUGAUAUUU	‡	‡
		F23	2113	hsa-miR-31#	UGCUAUGCCAACAUAUUGCCAU	----	----
		F24	2114	hsa-miR-130b#	ACUCUUUCCCUGUUGCACUAC	----	----
		G1	2115	hsa-miR-26a-2#	CCUAUUCUUGAUUACUUGUUUC	----	----
		G2	2116	hsa-miR-361-3p	UCCCCCAGGUGUGAUUCUGAUUU	----	----
		G3	2118	hsa-let-7g#	CUGUACAGGCCACUGCCUUGC	----	----
		G4	2119	hsa-miR-302b#	ACUUUAACAUGGAAGUGCUUUC	----	----
		G5	2120	hsa-miR-302d#	ACUUUAACAUGGAGGCACUUGC	----	----
		G6	2121	hsa-miR-367#	ACUGUUGCUAAUAUGCAACUCU	----	----
		G7	2125	hsa-miR-374a#	CUUAUCAGAUUGUAUUGUAAUU	----	----
		G8	2126	hsa-miR-23b#	UGGGUUCCUGGCAUGCUGAUUU	----	----
		G9	2127	hsa-miR-376a#	GUAGAUUCUCCUUCUAUGAGUA	----	----
		G10	2128	hsa-miR-377#	AGAGGUUGCCCUUGGUGAAUUC	----	----
		G11	338	ath-miR159a	UUUGGAUUGAAGGGAGCUCUA	----	----
		G12	2129	hsa-miR-30b#	CUGGGAGGUGGAUGUUUACUUC	----	----
		G13	2130	hsa-miR-122#	AACGCCAUUAUCACACUAAAUA	----	----
		G14	2131	hsa-miR-130a#	UUCACAUUGUGCUACUGUCUGC	----	----
		G15	2132	hsa-miR-132#	ACCGUGGCUUUCGAUUGUUACU	----	----
		G16	2134	hsa-miR-148a#	AAAGUUCUGAGACACUCCGACU	----	----
		G17	2135	hsa-miR-33a	GUGCAUUGUAGUUGCAUUGCA	----	----
		G18	2136	hsa-miR-33a#	CAAUGUUUCCACAGUGCAUCAC	----	----
		G19	2137	hsa-miR-92a-1#	AGGUUGGGAUCGGUUGCAAUGCU	----	----
		G20	2138	hsa-miR-92a-2#	GGGUGGGGAUUUGUUGCAUUAC	----	----
		G21	2139	hsa-miR-93#	ACUGCUGAGCUAGCACUUCCCG	----	----
		G22	2140	hsa-miR-96#	AAUCAUGUGCAGUGCCAAUAUG	----	----
		G23	2141	hsa-miR-99a#	CAAGCUCGCUUCUAUGGGUCUG	----	----
		G24	2142	hsa-miR-100#	CAAGCUUGUAUCUAUAGGUAUG	----	----
		H1	2143	hsa-miR-101#	CAGUUAUCACAGUGCUGAUGCU	----	----
		H2	2144	hsa-miR-138-2#	GCUAUUUCACGACACCAGGGUU	----	----
		H3	2145	hsa-miR-141#	CAUCUUCCAGUACAGUGUUGGA	----	----
		H4	2146	hsa-miR-143#	GGUGCAGUGCUGCAUCUCUGGU	----	‡
		H5	2148	hsa-miR-144#	GGAUAUCAUCAUAUACUGUAAG	----	----
		H6	2149	hsa-miR-145#	GGAUUCCUGGAAAUACUGUUCU	----	----
		H7	2150	hsa-miR-920	GGGGAGCUGUGGAAGCAGUA	----	----
		H8	2151	hsa-miR-921	CUAGUGAGGGACAGAACCAGGAUUC	----	----
		H9	2152	hsa-miR-922	GCAGCAGAGAAUAGGACUACGUC	----	----
		H10	2154	hsa-miR-924	AGAGUCUUGUGAUGUCUUGC	----	----
		H11	2157	hsa-miR-337-3p	CUCCUAUAUGAUGCCUUUCUUC	----	----
		H12	2158	hsa-miR-125b-2#	UCACAAGUCAGGCUCUUGGGAC	----	----
		H13	2159	hsa-miR-135b#	AUGUAGGGCUAAAAGCCAUGGG	----	----
		H14	2160	hsa-miR-148b#	AAGUUCUGUUAUACACUCAGGC	----	----
		H15	2163	hsa-miR-146a#	CCUCUGAAAUUCAGUUCUUCAG	----	----
		H16	2164	hsa-miR-149#	AGGGAGGGACGGGGGCUGUGC	----	----
		H17	2165	hsa-miR-29b-1#	GCUGGUUUCAUAUGGUGGUUUAGA	----	----
		H18	2166	hsa-miR-29b-2#	CUGGUUUCACAUGGUGGCUUAG	----	----
		H19	2168	hsa-miR-105#	ACGGAUGUUUGAGCAUGUGCUA	----	----
		H20	2170	hsa-miR-106a#	CUGCAAUGUAAGCACUUCUUAC	----	----
		H21	2171	hsa-miR-16-2#	CCAAUAUUACUGUGCUGCUUUA	‡	‡
		H22	2172	hsa-let-7i#	CUGCGCAAGCUACUGCCUUGCU	----	----
		H23	2173	hsa-miR-15b#	CGAAUCAUUAUUUGCUGCUCUA	----	----
		H24	2174	hsa-miR-27b#	AGAGCUUAGCUGAUUGGUGAAC	----	----
		I1	2176	hsa-miR-933	UGUGCGCAGGGAGACCUCUCCC	‡	----
		I2	2177	hsa-miR-934	UGUCUACUACUGGAGACACUGG	----	----
		I3	2178	hsa-miR-935	CCAGUUACCGCUUCCGCUACCGC	----	----
		I4	2179	hsa-miR-936	ACAGUAGAGGGAGGAAUCGCAG	----	----
		I5	2180	hsa-miR-937	AUCCGCGCUCUGACUCUCUGCC	----	----
		I6	2181	hsa-miR-938	UGCCCUUAAAGGUGAACCCAGU	----	----
		I7	2182	hsa-miR-939	UGGGGAGCUGAGGCUCUGGGGGUG	----	----
		I8	2183	hsa-miR-941	CACCCGGCUGUGUGCACAUGUGC	----	----
		I9	2185	hsa-miR-335#	UUUUUCAUUAUUGCUCCUGACC	----	----
		I10	2187	hsa-miR-942	UCUUCUCUGUUUUGGCCAUGUG	----	----
		I11	2188	hsa-miR-943	CUGACUGUUGCCGUCCUCCAG	----	----
		I12	2189	hsa-miR-944	AAAUUAUUGUACAUCGGAUGAG	----	----
		I13	2196	hsa-miR-99b#	CAAGCUCGUGUCUGUGGGUCCG	----	----
		I14	2197	hsa-miR-124#	CGUGUUCACAGCGGACCUUGAU	----	----
		I15	2200	hsa-miR-541#	AAAGGAUUCUGCUGUCGGUCCCACU	----	----
		I16	2203	hsa-miR-875-5p	UAUACCUCAGUUUUAUCAGGUG	----	----
		I17	2213	hsa-miR-888#	GACUGACACCUCUUUGGGUGAA	----	----
		I18	2214	hsa-miR-892b	CACUGGCUCCUUUCUGGGUAGA	----	----
		I19	2231	hsa-miR-9#	AUAAAGCUAGAUAACCGAAAGU	----	----
		I20	2238	hsa-miR-411#	UAUGUAACACGGUCCACUAACC	----	----
		I21	2243	hsa-miR-378	ACUGGACUUGGAGUCAGAAGG	----	‡
		I22	2254	hsa-miR-151-3p	CUAGACUGAAGCUCCUUGAGG	----	----
		I23	2259	hsa-miR-340#	UCCGUCUCAGUUACUUUAUAGC	----	----
		I24	2263	hsa-miR-190b	UGAUAUGUUUGAUAUUGGGUU	----	----
		J1	2266	hsa-miR-545#	UCAGUAAAUGUUUAUUAGAUGA	----	----
		J2	2270	hsa-miR-183#	GUGAAUUACCGAAGGGCCAUAA	----	----
		J3	2272	hsa-miR-192#	CUGCCAAUUCCAUAGGUCACAG	----	----
		J4	2274	hsa-miR-200b#	CAUCUUACUGGGCAGCAUUGGA	----	‡
		J5	2286	hsa-miR-200c#	CGUCUUACCCAGCAGUGUUUGG	----	----
		J6	2287	hsa-miR-155#	CUCCUACAUAUUAGCAUUAACA	----	----
		J7	2288	hsa-miR-10a#	CAAAUUCGUAUCUAGGGGAAUA	----	----
		J8	2293	hsa-miR-214#	UGCCUGUCUACACUUGCUGUGC	----	----
		J9	2294	hsa-miR-218-2#	CAUGGUUCUGUCAAGCACCGCG	----	----
		J10	2298	hsa-miR-129#	AAGCCCUUACCCCAAAAAGUAU	----	----
		J11	2301	hsa-miR-22#	AGUUCUUCAGUGGCAAGCUUUA	----	----
		J12	2302	hsa-miR-425#	AUCGGGAAUGUCGUGUCCGCCC	----	----
		J13	2305	hsa-miR-30d#	CUUUCAGUCAGAUGUUUGCUGC	----	----
		J14	2307	hsa-let-7a#	CUAUACAAUCUACUGUCUUUC	----	‡
		J15	2309	hsa-miR-424#	CAAAACGUGAGGCGCUGCUAU	----	----
		J16	2310	hsa-miR-18b#	UGCCCUAAAUGCCCCUUCUGGC	----	----
		J17	2311	hsa-miR-20b#	ACUGUAGUAUGGGCACUUCCAG	----	----
		J18	2312	hsa-miR-431#	CAGGUCGUCUUGCAGGGCUUCU	----	----
		J19	2314	hsa-miR-7-2#	CAACAAAUCCCAGUCUACCUAA	----	----
		J20	2315	hsa-miR-10b#	ACAGAUUCGAUUCUAGGGGAAU	----	----
		J21	2316	hsa-miR-34a#	CAAUCAGCAAGUAUACUGCCCU	----	----
		J22	2317	hsa-miR-181a-2#	ACCACUGACCGUUGACUGUACC	----	----
		J23	2325	hsa-miR-744#	CUGUUGCCACUAACCUCAACCU	----	----
		J24	2330	hsa-miR-452#	CUCAUCUGCAAAGAAGUAAGUG	----	----
		K1	2332	hsa-miR-409-3p	GAAUGUUGCUCGGUGAACCCCU	----	----
		K2	2333	hsa-miR-181c#	AACCAUCGACCGUUGAGUGGAC	----	----
		K3	2336	hsa-miR-196a#	CGGCAACAAGAAACUGCCUGAG	----	----
		K4	2339	hsa-miR-483-3p	UCACUCCUCUCCUCCCGUCUU	----	----
		K5	2342	hsa-miR-708#	CAACUAGACUGUGAGCUUCUAG	----	----
		K6	2343	hsa-miR-92b#	AGGGACGGGACGCGGUGCAGUG	----	----
		K7	2346	hsa-miR-551b#	GAAAUCAAGCGUGGGUGAGACC	----	----
		K8	2362	hsa-miR-202#	UUCCUAUGCAUAUACUUCUUUG	----	----
		K9	2366	hsa-miR-193b#	CGGGGUUUUGAGGGCGAGAUGA	----	----
		K10	2368	hsa-miR-497#	CAAACCACACUGUGGUGUUAGA	----	----
		K11	2371	hsa-miR-518e#	CUCUAGAGGGAAGCGCUUUCUG	----	----
		K12	2376	hsa-miR-543	AAACAUUCGCGGUGCACUUCUU	----	----
		K13	2378	hsa-miR-125b-1#	ACGGGUUAGGCUCUUGGGAGCU	----	----
		K14	2379	hsa-miR-194#	CCAGUGGGGCUGCUGUUAUCUG	----	----
		K15	2380	hsa-miR-106b#	CCGCACUGUGGGUACUUGCUGC	----	----
		K16	2381	hsa-miR-302a#	ACUUAAACGUGGAUGUACUUGCU	----	----
		K17	2384	hsa-miR-519b-3p	AAAGUGCAUCCUUUUAGAGGUU	----	----
		K18	2387	hsa-miR-518f#	CUCUAGAGGGAAGCACUUUCUC	----	----
		K19	2391	hsa-miR-374b#	CUUAGCAGGUUGUAUUAUCAUU	----	----
		K20	2400	hsa-miR-520c-3p	AAAGUGCUUCCUUUUAGAGGGU	----	‡
		K21	2404	hsa-let-7b#	CUAUACAACCUACUGCCUUCCC	----	‡
		K22	2405	hsa-let-7c#	UAGAGUUACACCCUGGGAGUUA	----	----
		K23	2407	hsa-let-7e#	CUAUACGGCCUCCUAGCUUUCC	----	----
		K24	2410	hsa-miR-550	AGUGCCUGAGGGAGUAAGAGCCC	----	----
		L1	2411	hsa-miR-593	UGUCUCUGCUGGGGUUUCU	----	----
		L2	2417	hsa-let-7f-1#	CUAUACAAUCUAUUGCCUUCCC	----	----
		L3	2418	hsa-let-7f-2#	CUAUACAGUCUACUGUCUUUCC	----	----
		L4	2419	hsa-miR-15a#	CAGGCCAUAUUGUGCUGCCUCA	----	----
		L5	2420	hsa-miR-16-1#	CCAGUAUUAACUGUGCUGCUGA	----	----
		L6	2421	hsa-miR-17#	ACUGCAGUGAAGGCACUUGUAG	----	----
		L7	2423	hsa-miR-18a#	ACUGCCCUAAGUGCUCCUUCUGG	----	----
		L8	2424	hsa-miR-19a#	AGUUUUGCAUAGUUGCACUACA	----	----
		L9	2425	hsa-miR-19b-1#	AGUUUUGCAGGUUUGCAUCCAGC	----	‡
		L10	2432	hsa-miR-625#	GACUAUAGAACUUUCCCCCUCA	----	‡
		L11	2434	hsa-miR-628-3p	UCUAGUAAGAGUGGCAGUCGA	----	----
		L12	2437	hsa-miR-20a#	ACUGCAUUAUGAGCACUUAAAG	----	----
		L13	2438	hsa-miR-21#	CAACACCAGUCGAUGGGCUGU	----	----
		L14	2439	hsa-miR-23a#	GGGGUUCCUGGGGAUGGGAUUU	----	----
		L15	2440	hsa-miR-24-1#	UGCCUACUGAGCUGAUAUCAGU	----	----
		L16	2441	hsa-miR-24-2#	UGCCUACUGAGCUGAAACACAG	----	----
		L17	2442	hsa-miR-25#	AGGCGGAGACUUGGGCAAUUG	----	----
		L18	2443	hsa-miR-26a-1#	CCUAUUCUUGGUUACUUGCACG	----	----
		L19	2444	hsa-miR-26b#	CCUGUUCUCCAUUACUUGGCUC	----	----
		L20	2445	hsa-miR-27a#	AGGGCUUAGCUGCUUGUGAGCA	----	----
		L21	2447	hsa-miR-29a#	ACUGAUUUCUUUUGGUGUUCAG	----	----
		L22	2642	hsa-miR-151-5P	UCGAGGAGCUCACAGUCUAGU	----	----
		L23	2643	hsa-miR-765	UGGAGGAGAAGGAAGGUGAUG	----	----
		L24	2658	hsa-miR-338-5P	AACAAUAUCCUGGUGCUGAGUG	‡	‡
		M1	2672	hsa-miR-620	AUGGAGAUAGAUAUAGAAAU	----	----
		M2	2675	hsa-miR-577	UAGAUAAAAUAUUGGUACCUG	----	----
		M3	2676	hsa-miR-144	UACAGUAUAGAUGAUGUACU	----	----
		M4	2677	hsa-miR-590-3P	UAAUUUUAUGUAUAAGCUAGU	----	----
		M5	2678	hsa-miR-191#	GCUGCGCUUGGAUUUCGUCCCC	----	----
		M6	2681	hsa-miR-665	ACCAGGAGGCUGAGGCCCCU	----	----
		M7	2743	hsa-miR-520D-3P	AAAGUGCUUCUCUUUGGUGGGU	----	----
		M8	2752	hsa-miR-1224-3P	CCCCACCUCCUCUCUCCUCAG	----	----
		M9	2867	hsa-miR-1305	UUUUCAACUCUAAUGGGAGAGA	----	‡
		M10	2756	hsa-miR-513C	UUCUCAAGGAGGUGUCGUUUAU	----	----
		M11	2757	hsa-miR-513B	UUCACAAGGAGGUGUCAUUUAU	----	----
		M12	2758	hsa-miR-1226#	GUGAGGGCAUGCAGGCCUGGAUGGGG	----	----
		M13	2761	hsa-miR-1236	CCUCUUCCCCUUGUCUCUCCAG	----	----
		M14	2763	hsa-miR-1228#	GUGGGCGGGGGCAGGUGUGUG	----	----
		M15	2766	hsa-miR-1225-3P	UGAGCCCCUGUGCCGCCCCCAG	----	----
		M16	2768	hsa-miR-1233	UGAGCCCUGUCCUCCCGCAG	----	----
		M17	2769	hsa-miR-1227	CGUGCCACCCUUUUCCCCAG	----	----
		M18	2773	hsa-miR-1286	UGCAGGACCAAGAUGAGCCCU	----	----
		M19	2775	hsa-miR-548M	CAAAGGUAUUUGUGGUUUUUG	----	----
		M20	2776	hsa-miR-1179	AAGCAUUCUUUCAUUGGUUGG	----	----
		M21	2777	hsa-miR-1178	UUGCUCACUGUUCUUCCCUAG	----	----
		M22	2778	hsa-miR-1205	UCUGCAGGGUUUGCUUUGAG	----	----
		M23	2779	hsa-miR-1271	CUUGGCACCUAGCAAGCACUCA	----	----
		M24	2781	hsa-miR-1201	AGCCUGAUUAAACACAUGCUCUGA	----	----
		N1	2783	hsa-miR-548J	AAAAGUAAUUGCGGUCUUUGGU	----	----
		N2	2784	hsa-miR-1263	AUGGUACCCUGGCAUACUGAGU	----	----
		N3	2785	hsa-miR-1294	UGUGAGGUUGGCAUUGUUGUCU	----	----
		N4	2789	hsa-miR-1269	CUGGACUGAGCCGUGCUACUGG	----	----
		N5	2790	hsa-miR-1265	CAGGAUGUGGUCAAGUGUUGUU	----	----
		N6	2791	hsa-miR-1244	AAGUAGUUGGUUUGUAUGAGAUGGUU	----	----
		N7	2792	hsa-miR-1303	UUUAGAGACGGGGUCUUGCUCU	----	----
		N8	2796	hsa-miR-1259	AUAUAUGAUGACUUAGCUUUU	----	----
		N9	2798	hsa-miR-548P	UAGCAAAAACUGCAGUUACUUU	----	----
		N10	2799	hsa-miR-1264	CAAGUCUUAUUUGAGCACCUGUU	----	----
		N11	2801	hsa-miR-1255B	CGGAUGAGCAAAGAAAGUGGUU	----	----
		N12	2803	hsa-miR-1282	UCGUUUGCCUUUUUCUGCUU	----	----
		N13	2805	hsa-miR-1255A	AGGAUGAGCAAAGAAAGUAGAUU	----	----
		N14	2807	hsa-miR-1270	CUGGAGAUAUGGAAGAGCUGUGU	----	----
		N15	2810	hsa-miR-1197	UAGGACACAUGGUCUACUUCU	----	----
		N16	2815	hsa-miR-1324	CCAGACAGAAUUCUAUGCACUUUC	----	----
		N17	2816	hsa-miR-548H	AAAAGUAAUCGCGGUUUUUGUC	----	----
		N18	2818	hsa-miR-1254	AGCCUGGAAGCUGGAGCCUGCAGU	----	----
		N19	2819	hsa-miR-548K	AAAAGUACUUGCGGAUUUUGCU	----	----
		N20	2820	hsa-miR-1251	ACUCUAGCUGCCAAAGGCGCU	----	----
		N21	2822	hsa-miR-1285	UCUGGGCAACAAAGUGAGACCU	----	----
		N22	2823	hsa-miR-1245	AAGUGAUCUAAAGGCCUACAU	----	----
		N23	2824	hsa-miR-1292	UGGGAACGGGUUCCGGCAGACGCUG	----	----
		N24	2827	hsa-miR-1301	UUGCAGCUGCCUGGGAGUGACUUC	----	----
		O1	2829	hsa-miR-1200	CUCCUGAGCCAUUCUGAGCCUC	----	----
		O2	2830	hsa-miR-1182	GAGGGUCUUGGGAGGGAUGUGAC	----	----
		O3	2832	hsa-miR-1288	UGGACUGCCCUGAUCUGGAGA	----	----
		O4	2838	hsa-miR-1291	UGGCCCUGACUGAAGACCAGCAGU	----	----
		O5	2840	hsa-miR-1275	GUGGGGGAGAGGCUGUC	----	----
		O6	2841	hsa-miR-1183	CACUGUAGGUGAUGGUGAGAGUGGGCA	----	----
		O7	2842	hsa-miR-1184	CCUGCAGCGACUUGAUGGCUUCC	----	----
		O8	2843	hsa-miR-1276	UAAAGAGCCCUGUGGAGACA	----	----
		O9	2844	hsa-miR-320B	AAAAGCUGGGUUGAGAGGGCAA	----	----
		O10	2845	hsa-miR-1272	GAUGAUGAUGGCAGCAAAUUCUGAAA	----	----
		O11	2847	hsa-miR-1180	UUUCCGGCUCGCGUGGGUGUGU	----	----
		O12	2850	hsa-miR-1256	AGGCAUUGACUUCUCACUAGCU	----	----
		O13	2851	hsa-miR-1278	UAGUACUGUGCAUAUCAUCUAU	----	----
		O14	2852	hsa-miR-1262	AUGGGUGAAUUUGUAGAAGGAU	----	----
		O15	2854	hsa-miR-1243	AACUGGAUCAAUUAUAGGAGUG	----	----
		O16	2857	hsa-miR-663B	GGUGGCCCGGCCGUGCCUGAGG	----	----
		O17	2860	hsa-miR-1252	AGAAGGAAAUUGAAUUCAUUUA	‡	----
		O18	2861	hsa-miR-1298	UUCAUUCGGCUGUCCAGAUGUA	----	----
		O19	2863	hsa-miR-1290	UGGAUUUUUGGAUCAGGGA	----	----
		O20	2868	hsa-miR-1249	ACGCCCUUCCCCCCCUUCUUCA	----	----
		O21	2870	hsa-miR-1248	ACCUUCUUGUAUAAGCACUGUGCUAAA	----	----
		O22	2871	hsa-miR-1289	UGGAGUCCAGGAAUCUGCAUUUU	‡	----
		O23	2872	hsa-miR-1204	UCGUGGCCUGGUCUCCAUUAU	----	----
		O24	2873	hsa-miR-1826	AUUGAUCAUCGACACUUCGAACGCAAU	----	----
		P1	2874	hsa-miR-1304	UUUGAGGCUACAGUGAGAUGUG	----	----
		P2	2877	hsa-miR-1203	CCCGGAGCCAGGAUGCAGCUC	----	----
		P3	2878	hsa-miR-1206	UGUUCAUGUAGAUGUUUAAGC	----	----
		P4	2879	hsa-miR-548G	AAAACUGUAAUUACUUUUGUAC	----	‡
		P5	2880	hsa-miR-1208	UCACUGUUCAGACAGGCGGA	----	----
		P6	2881	hsa-miR-548E	AAAAACUGAGACUACUUUUGCA	----	----
		P7	2883	hsa-miR-1274A	GUCCCUGUUCAGGCGCCA	----	‡
		P8	2884	hsa-miR-1274B	UCCCUGUUCGGGCGCCA	----	----
		P9	2885	hsa-miR-1267	CCUGUUGAAGUGUAAUCCCCA	----	----
		P10	2887	hsa-miR-1250	ACGGUGCUGGAUGUGGCCUUU	----	----
		P11	2888	hsa-miR-548N	CAAAAGUAAUUGUGGAUUUUGU	----	----
		P12	2890	hsa-miR-1283	UCUACAAAGGAAAGCGCUUUCU	----	----
		P13	2893	hsa-miR-1247	ACCCGUCCCGUUCGUCCCCGGA	----	----
		P14	2894	hsa-miR-1253	AGAGAAGAAGAUCAGCCUGCA	----	----
		P15	2895	hsa-miR-720	UCUCGCUGGGGCCUCCA	----	----
		P16	2896	hsa-miR-1260	AUCCCACCUCUGCCACCA	----	----
		P17	2897	hsa-miR-664	UAUUCAUUUAUCCCCAGCCUACA	----	----
		P18	2901	hsa-miR-1302	UUGGGACAUACUUAUGCUAAA	----	----
		P19	2902	hsa-miR-1300	UUGAGAAGGAGGCUGCUG	----	----
		P20	2903	hsa-miR-1284	UCUAUACAGACCCUGGCUUUUC	----	----
		P21	2904	hsa-miR-548L	AAAAGUAUUUGCGGGUUUUGUC	----	----
		P22	2905	hsa-miR-1293	UGGGUGGUCUGGAGAUUUGUGC	----	----
		P23	2907	hsa-miR-1825	UCCAGUGCCCUCCUCUCC	----	‡
		P24	2908	hsa-miR-1296	UUAGGGCCCUGGCUCCAUCUCC	----	----
